# Supplementary material for: Prophage-encoded Hm-oscar gene recapitulates Wolbachia-induced male-killing in the tea tortrix moth Homona magnanima
Source: eLife. 2025 Apr 14;13:RP101101. doi: 10.7554/eLife.101101 (PMC11996169; doi:10.7554/eLife.101101)
Supplement: Figure 1—source data 1. [file elife-101101-fig1-data1.xlsx]

## Sheet: Sheet1
ID	Accession ID	#Protein sequences
wFur-Oscar	URG39950.1	MEDRHIPFLSSLAILLWYGINKADRYGYTPLHLAVQSGNLEIVNALVGRGADVDKADRYERTPLHLAVQSGNLEIINALVGRGADVDKADRYERTPLHLAVQSGNLEIINALVGRGADVNKADKYGSTPLNFAAQIGNAEIINALVAHEVGDDICTPLHLAVLRNDMELVNSLIKQGANVCQESRGRYIPLHLAARAGNVEMINALIEQGAKINQMNNDRFTPLHFAVQVGDVDVVNALLARSANVNEVGKYGFTPLHLATQVSNAEVIRALIERGADVNKADKYGYTPLHLAVQSGNLEIINALVGRGADINKADKYERAPLHLAVQVGDVNVVNALLARSANVNKVDRYGHTPLHLAVQSGNLEIINALVGRGADINKADKYERAPLHLAVQVGDVN…
wHmt-Hm-oscar	BDG76756.1	MIEDRNVPLSLAIQLGDVDMANALVAGGADVNKVDKCGSTPLHLAVQLVNLEMVNALIARGADVNKVDKCGSTPLHLAVQLVNLEMVNALIARGADVNKVDKCGSTPLHFAAQIGNAEIINALIAHEVGDDRCTPLHLAVLRNDMELVNSLIKLGANVCQESRGGYVPLHLAARAGNVEMINALIERGAKINQMNDDRFTPLHFAVQVGDVEVVNILLARGASVHRVDKYGFTPLHFATQVSNAEVIRALIERGADVNQTNSDKYVCGNSCRYANRNTPLHLAIERGNLEAVNCLLAEGADINQTDRNGFTPLHLAVQAGDVEVVNALVGRGADVNKVYKRGSTPLHFATQIGSNAEIINALIAHEVGDDRCTPLHLAVLRNDMELVNSLIERGADVNK…
wHmt-wmk-1	BDH38485.1	MANISIRYQIAQKVRSWRLKRGYTQKDLAGKIGVTYQIVLQYEKGTRKISIEKLYSIAKVLSIGIVDLIPVSNEKICLKTEEEEILNLIRKYRKINDQELRKIFCLLTKFVQVSERSSRKAEKVKIAKGLVKAGVSVDTVSKTIGLSADECVEEKTGSIYYQIGKKIKEWTGIYSEGFSRKNEYNT
wHmt-wmk-2	BDH38486.1	MSTTRDEISNYEQGRVAIPLEKLYAIAETLSISIIDLLIEEDEIVENELPDLIKEYKKIESQELRNALIRSLFEGIRICEEKVKRAEKIKIAKDLVKKGISINIILKTIGISLDEIQQI
wHmt-wmk-3	BDH38483.1	MERSLDYEVGQKVKNWRLERGYTQKDLAEKLGVKYWVILQYEKGNRRISIERLYAIAEVLSISITDLIPVSKSCLEDGGEEILNLVREYKKINDQELRRMFCLLTQFVQVSEKSSRKAEKVKIAKGLVEAGVSVDIVAKTIGLSADECVEEKTGSIYCQIGKKIKEWRLVREYTQKDLAEKMNTTRHEISNYEQGRTAVPLDKLYEMAEALSINITDLLIEEGSKVKNELPDLIKEYKEIESQELRNALIKFLFEGIRLCEEKVREVERIKVGRDLVKGGIPLDIILQVVDLSADQIG
wHmt-wmk-4	BDH38484.1	MFVSVRDVSPISYKIGQKMENSRLMRGHTQIELASKIGLTYQEVNSYENGYSSIPIEVLYVIARVLSVDVVDLLPEPVIVREDSYEDEEILYLTKIYENQKLGKIVPSLVRFVHISEKINQEEARLEVAKNLVKEGVSVDIISQATGLSIYEYNDTRKEVCTDSIYYRVGQRIREWRLIRRYTQKDLADKVDLTLKEIHEYEKGYTAISFDKLYEIARELSVNIKVLLPETRESKEENKLLSLIKALLPKITECEDENSKKLLSLMDEYREDENQESLDALVKSLSEDMKSGKEKVKKAEKIRVAKNLSKADVSIDIILRASGLTVGELGECEN
