# Supplementary material for: Prophage-encoded Hm-oscar gene recapitulates Wolbachia-induced male-killing in the tea tortrix moth Homona magnanima
Source: eLife. 2025 Apr 14;13:RP101101. doi: 10.7554/eLife.101101 (PMC11996169; doi:10.7554/eLife.101101)
Supplement: Figure 1—source data 2. [file elife-101101-fig1-data2.xlsx]

## Sheet: source data Fig.1
Genes	ID	Total	Female	Male	Female ratio	Male ratio		ID	Accession ID	#Codon-optimised nucleotide sequences for each gene
wmk-1	1	12	6	6	0.5	0.5		Constract wHmt-wmk-1	LC701688.1	ATGGCCAATATCAGTATCCGCTACCAAATTGCCCAGAAGGTCCGTTCGTGGCGCTTGAAACGTGGTTATACTCAGAAAGACCTCGCCGGCAAAATTGGCGTCACCTATCAGATCGTACTCCAGTACGAAAAAGGCACCCGCAAGATATCCATTGAGAAGCTCTATTCCATTGCTAAGGTGTTGTCCATCGGCATCGTGGATTTGATCCCCGTCAGTAACGAGAAAATTTGTCTGAAGACGGAGGAAGAGGAAATCCTGAATCTGATCCGGAAGTATAGGAAGATCAATGACCAAGAGCTGCGAAAGATCTTTTGCCTGCTGACCAAGTTCGTGCAGGTGAGCGAGCGGAGCAGCCGCAAAGCGGAGAAGGTTAAAATAGCGAAAGGTCTGGTGAAGGCC…
wmk-1	2	23	12	11	0.521739	0.478261		Constract wHmt-wmk-1-t2a-wmk-2	LC701692.1	ATGGCCAATATCAGTATCCGCTACCAAATTGCCCAGAAGGTCCGTTCGTGGCGCTTGAAACGTGGTTATACTCAGAAAGACCTCGCCGGCAAAATTGGCGTCACCTATCAGATCGTACTCCAGTACGAAAAAGGCACCCGCAAGATATCCATTGAGAAGCTCTATTCCATTGCTAAGGTGTTGTCCATCGGCATCGTGGATTTGATCCCCGTCAGTAACGAGAAAATTTGTCTGAAGACGGAGGAAGAGGAAATCCTGAATCTGATCCGGAAGTATAGGAAGATCAATGACCAAGAGCTGCGAAAGATCTTTTGCCTGCTGACCAAGTTCGTGCAGGTGAGCGAGCGGAGCAGCCGCAAAGCGGAGAAGGTTAAAATAGCGAAAGGTCTGGTGAAGGCC…
wmk-1	3	18	11	7	0.611111	0.388889		Constract wHmt-wmk-2	LC701689.1	ATGTCCACCACCCGTGACGAAATCAGCAACTATGAACAAGGTCGCGTTGCAATCCCGTTGGAAAAGCTGTACGCCATCGCCGAGACACTCAGCATCAGCATCATCGACCTGCTGATCGAAGAGGACGAAATCGTGGAAAATGAGCTGCCCGATCTGATCAAGGAGTACAAGAAGATTGAGTCGCAGGAGCTGCGCAACGCTCTGATCCGGTCCTTGTTCGAGGGAATAAGGATTTGCGAGGAGAAGGTCAAACGAGCCGAGAAGATAAAGATAGCGAAGGATTTGGTGAAAAAAGGCATTAGTATCAATATAATTCTCAAAACGATTGGCATTTCGCTCGATGAGATTCAGCAGATTTAA
wmk-1	4	10	5	5	0.5	0.5		Constract wHmt-wmk-3	LC701690.1	ATGGAACGTAGTTTGGATTATGAGGTAGGTCAGAAGGTGAAGAACTGGCGGTTGGAGCGCGGCTATACGCAGAAAGATCTGGCCGAAAAGCTGGGCGTGAAATACTGGGTGATTCTGCAATATGAGAAGGGTAATCGCCGCATCAGCATCGAGCGCTTGTACGCAATCGCCGAAGTGCTGTCCATCAGCATCACGGATCTGATACCCGTGAGCAAAAGCTGCCTGGAGGATGGCGGAGAAGAAATTCTGAACTTGGTTCGCGAGTATAAAAAGATTAATGATCAAGAACTGCGCCGAATGTTCTGTTTGTTGACGCAGTTCGTCCAAGTATCGGAGAAGAGTAGCCGCAAAGCTGAAAAGGTGAAGATTGCCAAGGGCCTCGTTGAAGCGGGTGTGTCC…
wmk-1	5	13	5	8	0.384615	0.615385		Constract wHmt-wmk-3-t2a-wmk-4	LC701693.1	ATGGAACGTAGTTTGGATTATGAGGTAGGTCAGAAGGTGAAGAACTGGCGGTTGGAGCGCGGCTATACGCAGAAAGATCTGGCCGAAAAGCTGGGCGTGAAATACTGGGTGATTCTGCAATATGAGAAGGGTAATCGCCGCATCAGCATCGAGCGCTTGTACGCAATCGCCGAAGTGCTGTCCATCAGCATCACGGATCTGATACCCGTGAGCAAAAGCTGCCTGGAGGATGGCGGAGAAGAAATTCTGAACTTGGTTCGCGAGTATAAAAAGATTAATGATCAAGAACTGCGCCGAATGTTCTGTTTGTTGACGCAGTTCGTCCAAGTATCGGAGAAGAGTAGCCGCAAAGCTGAAAAGGTGAAGATTGCCAAGGGCCTCGTTGAAGCGGGTGTGTCC…
wmk-1	6	19	8	11	0.421053	0.578947		Constract wHmt-wmk-4	LC701691.1	ATGTTCGTTAGTGTACGTGACGTGTCCCCCATTAGCTACAAAATTGGTCAGAAAATGGAAAACAGCCGTTTGATGCGCGGCCATACCCAAATCGAGCTGGCGTCCAAAATCGGTCTGACCTATCAAGAAGTTAACTCCTATGAAAATGGCTACAGCAGCATTCCCATTGAGGTCCTGTATGTGATCGCTCGTGTATTGAGTGTCGACGTCGTAGATCTGCTGCCGGAACCGGTCATAGTGCGCGAGGATTCGTACGAGGACGAAGAGATTTTGTATCTGACTAAGATCTATGAGAATCAGAAGTTGGGAAAGATTGTGCCTAGCCTGGTGCGATTTGTGCACATCAGCGAAAAAATTAACCAGGAAGAGGCTCGCTTGGAAGTCGCCAAAAACTTGGTG…
wmk-2	1	13	5	8	0.384615	0.615385		Constract wHmt-Hm-oscar	LC701694.1	ATGATCGAGGACCGAAATGTCCCATTGAGCTTGGCAATACAACTCGGCGATGTCGACATGGCAAACGCTCTCGTGGCGGGAGGCGCGGATGTCAATAAAGTCGATAAATGCGGCTCCACCCCACTGCATCTCGCAGTTCAGCTGGTTAACCTCGAAATGGTCAATGCGCTCATCGCGAGGGGAGCTGACGTAAATAAAGTCGACAAGTGCGGTTCCACCCCGTTGCATCTCGCGGTACAGTTGGTCAACCTGGAAATGGTCAACGCATTGATAGCCCGAGGAGCAGATGTGAATAAGGTGGATAAATGTGGATCGACACCACTCCATTTTGCAGCCCAAATCGGAAATGCAGAAATCATCAACGCCCTCATAGCTCATGAAGTTGGTGATGACCGCTGC…
wmk-2	2	27	13	14	0.481481	0.518519
wmk-2	3	20	9	11	0.45	0.55
wmk-2	4	46	23	23	0.5	0.5
wmk-2	5	23	12	11	0.521739	0.478261
wmk1-2	1	34	16	18	0.470588	0.529412
wmk1-2	2	42	20	22	0.47619	0.52381
wmk1-2	3	11	6	5	0.545455	0.454545
wmk1-2	4	25	13	12	0.52	0.48
wmk1-2	5	33	17	16	0.515152	0.484848
wmk-3	1	33	14	19	0.424242	0.575758
wmk-3	2	12	4	8	0.333333	0.666667
wmk-3	3	92	49	43	0.532609	0.467391
wmk-3	4	22	11	11	0.5	0.5
wmk-3	5	11	6	5	0.545455	0.454545
wmk-4	1	10	5	5	0.5	0.5
wmk-4	2	14	6	8	0.428571	0.571429
wmk-4	3	25	11	14	0.44	0.56
wmk-4	4	32	15	17	0.46875	0.53125
wmk-4	5	25	13	12	0.52	0.48
wmk-3-4	1	35	15	20	0.428571	0.571429
wmk-3-4	2	53	30	23	0.566038	0.433962
wmk-3-4	3	11	4	7	0.363636	0.636364
wmk-3-4	4	13	5	8	0.384615	0.615385
wmk-3-4	5	50	18	32	0.36	0.64
GFP	1	20	10	10	0.5	0.5
GFP	2	16	8	8	0.5	0.5
GFP	3	14	7	7	0.5	0.5
GFP	4	13	7	6	0.538462	0.461538
GFP	5	11	6	5	0.545455	0.454545
GFP	6	17	8	9	0.470588	0.529412
GFP	7	31	16	15	0.516129	0.483871
GFP	8	53	26	27	0.490566	0.509434
GFP	9	33	17	16	0.515152	0.484848
GFP	10	41	21	20	0.512195	0.487805
HmOscar	1	16	12	4	0.75	0.25
HmOscar	2	15	13	2	0.866667	0.133333
HmOscar	3	10	7	3	0.7	0.3
HmOscar	4	8	8	0	1	0
HmOscar	5	19	15	4	0.789474	0.210526
HmOscar	6	36	22	14	0.611111	0.388889
HmOscar	7	14	12	2	0.857143	0.142857
HmOscar	8	40	36	4	0.9	0.1
HmOscar	9	12	11	1	0.916667	0.0833333
HmOscar	10	15	11	4	0.733333	0.266667
HmOscar	11	10	9	1	0.9	0.1
HmOscar	12	25	23	2	0.92	0.08
HmOscar	13	10	9	1	0.9	0.1
HmOscar	14	18	18	0	1	0
HmOscar	15	12	12	0	1	0
NSR	1	43	22	21	0.511628	0.488372
NSR	2	35	17	18	0.485714	0.514286
NSR	3	68	32	36	0.470588	0.529412
NSR	4	87	41	46	0.471264	0.528736
NSR	5	31	13	18	0.419355	0.580645
NSR	6	32	17	15	0.53125	0.46875
NSR	7	45	22	23	0.488889	0.511111
NSR	8	35	18	17	0.514286	0.485714
NSR	9	40	19	21	0.475	0.525
WT12	1	23	23	0	1	0
WT12	2	26	25	1	0.961538	0.0384615
WT12	3	19	19	0	1	0
WT12	4	31	31	0	1	0
WT12	5	27	27	0	1	0
WT12	6	26	26	0	1	0
WT12	7	12	11	1	0.916667	0.0833333
WT12	8	23	23	0	1	0
