# Supplementary material for: Prophage-encoded Hm-oscar gene recapitulates Wolbachia-induced male-killing in the tea tortrix moth Homona magnanima
Source: eLife. 2025 Apr 14;13:RP101101. doi: 10.7554/eLife.101101 (PMC11996169; doi:10.7554/eLife.101101)
Supplement: Figure 1—source data 3. [file elife-101101-fig1-data3.xlsx]

## Sheet: Steel.Dwass Fig.1
ID	comparison	t.value	p.value
1	8.GFP:9.HmOscar	4.1715	0.00125139
2	0.NSR:9.HmOscar	4.03811	0.00218709
3	2.wmk-1:9.HmOscar	3.47676	0.0182164
4	4.wmk1-2:9.HmOscar	3.28564	0.0342677
5	7.wmk-3-4:9.HmOscar	3.28564	0.0342677
6	3.wmk-2:9.HmOscar	3.2844	0.0344035
7	5.wmk-3:9.HmOscar	3.2844	0.0344035
8	6.wmk-4:9.HmOscar	3.2844	0.0344035
9	1.WT12:9.HmOscar	3.1003	0.0603593
10	0.NSR:1.WT12	3.69645	0.00831692
11	1.WT12:8.GFP	3.77667	0.00615436
12	1.WT12:2.wmk-1	3.35743	0.0271794
13	1.WT12:4.wmk1-2	3.20764	0.0437367
14	1.WT12:7.wmk-3-4	3.20764	0.0437367
15	1.WT12:3.wmk-2	3.20362	0.0442805
16	1.WT12:5.wmk-3	3.20362	0.0442805
17	1.WT12:6.wmk-4	3.20362	0.0442805
18	7.wmk-3-4:8.GFP	1.84704	0.70491
19	0.NSR:8.GFP	1.77345	0.752184
20	6.wmk-4:8.GFP	1.73808	0.773703
21	0.NSR:7.wmk-3-4	1.67964	0.807281
22	3.wmk-2:8.GFP	1.67447	0.810123
23	4.wmk1-2:7.wmk-3-4	1.57628	0.859879
24	4.wmk1-2:6.wmk-4	1.48492	0.898509
25	6.wmk-4:7.wmk-3-4	1.4712	0.903659
26	2.wmk-1:7.wmk-3-4	1.37874	0.933936
27	3.wmk-2:4.wmk1-2	1.27279	0.959723
28	3.wmk-2:7.wmk-3-4	1.26103	0.962049
29	0.NSR:4.wmk1-2	1.21752	0.969797
30	2.wmk-1:8.GFP	0.662589	0.999695
31	2.wmk-1:3.wmk-2	0.555348	0.99993
32	2.wmk-1:4.wmk1-2	0.554055	0.999931
33	0.NSR:6.wmk-4	0.540509	0.999944
34	5.wmk-3:7.wmk-3-4	0.523823	0.999957
35	5.wmk-3:8.GFP	0.495233	0.999974
36	0.NSR:3.wmk-2	0.469774	0.999983
37	4.wmk1-2:5.wmk-3	0.420342	0.999994
38	3.wmk-2:5.wmk-3	0.419058	0.999994
39	0.NSR:2.wmk-1	0.296755	1
40	2.wmk-1:6.wmk-4	0.277027	1
41	5.wmk-3:6.wmk-4	0.209529	1
42	0.NSR:5.wmk-3	0.201782	1
43	2.wmk-1:5.wmk-3	0.0923425	1
44	3.wmk-2:6.wmk-4	0.105085	1
45	4.wmk1-2:8.GFP	0	1
