# Supplementary material for: Prophage-encoded Hm-oscar gene recapitulates Wolbachia-induced male-killing in the tea tortrix moth Homona magnanima
Source: eLife. 2025 Apr 14;13:RP101101. doi: 10.7554/eLife.101101 (PMC11996169; doi:10.7554/eLife.101101)
Supplement: Figure 2—source data 1. [file elife-101101-fig2-data1.xlsx]

## Sheet: source data Fig.2
Line	Status	Female	Male
NSR	Hatched	23	25
	Unhatched	28	28
WT12	Hatched	34	6
	Unhatched	27	47
Hm-Oscar	Hatched	21	3
	Unhatched	18	38
