# Supplementary material for: Prophage-encoded Hm-oscar gene recapitulates Wolbachia-induced male-killing in the tea tortrix moth Homona magnanima
Source: eLife. 2025 Apr 14;13:RP101101. doi: 10.7554/eLife.101101 (PMC11996169; doi:10.7554/eLife.101101)
Supplement: Figure 3—source data 1. [file elife-101101-fig3-data1.xlsx]

## Sheet: source data Fig.3
Fig.3a
chromosome	Log2[OscM-OscF]
Chr01	1.22339
Chr01	1.55357
Chr01	-0.0908064
Chr01	0.143101
Chr01	-1.36073
Chr01	0.0852265
Chr01	0.482322
Chr01	1.6019
Chr01	-0.0770396
Chr01	0.680707
Chr01	1.08982
Chr01	-0.777603
Chr01	0.77439
Chr01	0.745957
Chr01	0.304964
Chr01	-0.0830937
Chr01	1.48039
Chr01	0.478218
Chr01	3.71757
Chr01	1.00699
Chr01	-0.583023
Chr01	0.472241
Chr01	2.09391
Chr01	0.491315
Chr01	2.22246
Chr01	1.87676
Chr01	0.426742
Chr01	0.786251
Chr01	0.30058
Chr01	0.30058
Chr01	0.936562
Chr01	0.936562
Chr01	0.600808
Chr01	-0.562109
Chr01	-1.37338
Chr01	-0.885567
Chr01	-0.0308173
Chr01	-0.398165
Chr01	-0.0442443
Chr01	-0.533161
Chr01	0.907813
Chr01	-0.531532
Chr01	-0.0921963
Chr01	-0.270694
Chr01	0.987264
Chr01	0.431334
Chr01	-0.192638
Chr01	0.175252
Chr01	0.0220743
Chr01	-0.402155
Chr01	2.91297
Chr01	0.431905
Chr01	1.05784
Chr01	0.724552
Chr01	0.724552
Chr01	0.276034
Chr01	-0.120493
Chr01	1.15703
Chr01	0.532912
Chr01	-0.0576182
Chr01	0.443999
Chr01	0.10362
Chr01	0.445937
Chr01	0.445937
Chr01	0.585502
Chr01	0.585502
Chr01	0.79197
Chr01	0.79197
Chr01	0.296647
Chr01	0.692186
Chr01	0.692186
Chr01	0.40013
Chr01	-0.0459592
Chr01	0.197627
Chr01	-0.381104
Chr01	0.924866
Chr01	-0.696471
Chr01	10.8163
Chr01	0.549136
Chr01	0.745548
Chr01	0.485101
Chr01	0.290456
Chr01	0.256785
Chr01	0.39748
Chr01	0.171966
Chr01	0.566116
Chr01	0.566116
Chr01	-1.06331
Chr01	1.05484
Chr01	1.05484
Chr01	0.469292
Chr01	0.609039
Chr01	0.390051
Chr01	1.24293
Chr01	1.16294
Chr01	-0.182184
Chr01	3.53106
Chr01	1.26716
Chr01	0.407828
Chr01	0.589529
Chr01	1.19958
Chr01	0.393177
Chr01	-11.9159
Chr01	-0.454738
Chr01	0.478444
Chr01	0.352291
Chr01	0.541596
Chr01	-0.942548
Chr01	12.4539
Chr01	11.7077
Chr01	0.0451397
Chr01	0.703591
Chr01	0.0606836
Chr01	0.310412
Chr01	0.357341
Chr01	0.221212
Chr01	-1.07979
Chr01	-0.35745
Chr01	1.60785
Chr01	0.553796
Chr01	0.217155
Chr01	0.0930015
Chr01	-0.465863
Chr01	0.395415
Chr01	-0.0810102
Chr01	-0.333975
Chr01	-0.0166707
Chr01	0.235749
Chr01	0.27864
Chr01	1.00899
Chr01	0.0796338
Chr01	0.494973
Chr01	0.0554652
Chr01	1.32321
Chr01	0.500076
Chr01	0.185401
Chr01	2.08824
Chr01	0.706122
Chr01	-0.189165
Chr01	0.752807
Chr01	0.752807
Chr01	0.261818
Chr01	0.18442
Chr01	0.342401
Chr01	0.701437
Chr01	1.56973
Chr01	0.515579
Chr01	-0.707288
Chr01	0.0998048
Chr01	0.31736
Chr01	0.31736
Chr01	-0.629823
Chr01	0.0100217
Chr01	0.0100217
Chr01	-0.597871
Chr01	0.341409
Chr01	1.44804
Chr01	1.44804
Chr01	0.262943
Chr01	0.603939
Chr01	0.573388
Chr01	1.52223
Chr01	-0.00113102
Chr01	-1.08699
Chr01	-0.124359
Chr01	0.263695
Chr01	0.263695
Chr01	1.19064
Chr01	0.643081
Chr01	0.562819
Chr01	0.357151
Chr01	0.546662
Chr01	0.0804011
Chr01	0.275148
Chr01	0.540882
Chr01	0.393298
Chr01	-2.39086
Chr01	0.756773
Chr01	-0.75259
Chr01	0.213628
Chr01	0.0850029
Chr01	0.15634
Chr01	0.0378313
Chr01	-0.140676
Chr01	0.212641
Chr01	0.543576
Chr01	0.711685
Chr01	0.636811
Chr01	0.201609
Chr01	0.196334
Chr01	0.427382
Chr01	0.127539
Chr01	-0.077546
Chr01	0.626313
Chr01	1.78228
Chr01	0.67231
Chr01	2.61239
Chr01	0.163964
Chr01	0.95563
Chr01	0.629915
Chr01	0.629915
Chr01	0.307241
Chr01	0.718993
Chr01	0.718993
Chr01	1.24273
Chr01	0.63676
Chr01	0.552239
Chr01	0.552239
Chr01	0.259548
Chr01	0.76946
Chr01	1.27835
Chr01	0.186071
Chr01	0.253118
Chr01	-0.119374
Chr01	-0.231655
Chr01	1.33146
Chr01	0.0720566
Chr01	0.478524
Chr01	0.595992
Chr01	0.875861
Chr01	0.382661
Chr01	0.382661
Chr01	0.616293
Chr01	2.75775
Chr01	2.75775
Chr01	0.691473
Chr01	0.691473
Chr01	0.668283
Chr01	1.07863
Chr01	1.18424
Chr01	0.263224
Chr01	-0.316297
Chr01	-0.488916
Chr01	0.0407742
Chr01	0.260686
Chr01	-0.609743
Chr01	0.464631
Chr01	0.464631
Chr01	0.860046
Chr01	1.39022
Chr01	0.138112
Chr01	0.177941
Chr01	-1.25077
Chr01	1.15597
Chr01	1.12357
Chr01	0.0186816
Chr01	-0.282376
Chr01	-0.673359
Chr01	0.26583
Chr01	0.182641
Chr01	0.360997
Chr01	0.270548
Chr01	-10.9959
Chr01	0.46035
Chr01	0.519402
Chr01	0.87608
Chr01	-0.164137
Chr01	-0.438713
Chr01	-0.438713
Chr01	0.370538
Chr01	0.273127
Chr01	1.04749
Chr01	1.89769
Chr01	2.76571
Chr01	2.85068
Chr01	0.596955
Chr01	-0.0539079
Chr01	0.345628
Chr01	0.345628
Chr01	0.420038
Chr01	0.607875
Chr01	0.607875
Chr01	7.18588
Chr01	0.381368
Chr01	-0.0294317
Chr01	0.449019
Chr01	0.203446
Chr01	0.11067
Chr01	0.697783
Chr01	0.212581
Chr01	0.212581
Chr01	0.0504448
Chr01	1.01488
Chr01	0.302375
Chr01	-0.394524
Chr01	1.43757
Chr01	-0.194905
Chr01	0.312074
Chr01	0.312074
Chr01	0.235041
Chr01	-2.18453
Chr01	11.4456
Chr01	-0.58613
Chr01	0.306163
Chr01	0.724848
Chr01	0.734594
Chr01	1.81345
Chr01	-0.0846135
Chr01	0.812345
Chr01	0.315851
Chr01	0.597664
Chr01	0.114398
Chr01	0.54969
Chr01	0.34026
Chr01	0.424135
Chr01	0.110885
Chr01	0.975767
Chr01	-0.323563
Chr01	-0.122838
Chr01	-0.189758
Chr01	0.438873
Chr01	0.329568
Chr01	0.241971
Chr01	0.52659
Chr01	0.559772
Chr01	0.559772
Chr01	0.787377
Chr01	-0.258448
Chr01	0.597346
Chr01	0.31024
Chr01	0.251609
Chr01	0.705427
Chr01	0.342702
Chr01	0.992936
Chr01	0.796206
Chr01	1.59945
Chr01	0.414729
Chr01	1.11419
Chr01	0.247043
Chr01	-0.174911
Chr01	-0.0194008
Chr01	0.454348
Chr01	-0.867655
Chr01	-0.340414
Chr01	0.350329
Chr01	0.350329
Chr01	1.01684
Chr01	1.01684
Chr01	1.01684
Chr01	0.769965
Chr01	0.902009
Chr01	0.429583
Chr01	0.547916
Chr01	2.74044
Chr01	0.534799
Chr01	0.215491
Chr01	-0.631064
Chr01	-0.0695872
Chr01	0.619282
Chr01	0.724867
Chr01	0.241057
Chr01	1.204
Chr01	1.4452
Chr01	0.417214
Chr01	1.52876
Chr01	1.00474
Chr01	0.112101
Chr01	1.41924
Chr01	0.0197422
Chr01	0.0229675
Chr01	0.362227
Chr01	0.449267
Chr01	0.531917
Chr01	0.622968
Chr01	1.94398
Chr01	0.289474
Chr01	0.855623
Chr01	0.398833
Chr01	0.659492
Chr01	0.143419
Chr01	1.01856
Chr01	0.456484
Chr01	0.0472131
Chr01	0.619105
Chr01	-0.949659
Chr01	0.0685993
Chr01	-0.216023
Chr01	0.227568
Chr01	0.487494
Chr01	1.05234
Chr01	0.307617
Chr01	1.2952
Chr01	-0.275409
Chr01	0.286039
Chr01	1.93166
Chr01	1.51744
Chr01	1.51744
Chr01	1.303
Chr01	1.303
Chr01	0.730858
Chr01	0.730858
Chr01	-0.00483422
Chr01	0.4804
Chr01	1.65701
Chr01	0.0591572
Chr01	0.0591572
Chr01	-0.315799
Chr01	0.41596
Chr01	0.469603
Chr01	-0.20941
Chr01	-0.113257
Chr01	-0.00101206
Chr01	1.00402
Chr01	-0.79339
Chr01	0.198817
Chr01	0.0464984
Chr01	-0.364876
Chr01	0.665377
Chr01	0.61431
Chr01	0.603033
Chr01	1.02675
Chr01	0.0992003
Chr01	0.622598
Chr01	3.73786
Chr01	3.73786
Chr01	0.964119
Chr01	9.58147
Chr01	0.0190499
Chr01	1.19467
Chr01	0.797797
Chr01	0.871286
Chr01	-0.4431
Chr01	0.701872
Chr01	-0.187359
Chr01	-0.0337652
Chr01	0.338547
Chr01	10.1218
Chr01	0.365234
Chr01	-0.340664
Chr01	1.27672
Chr01	0.791704
Chr01	0.0931831
Chr01	0.351393
Chr01	0.694794
Chr01	-0.178082
Chr01	0.265054
Chr01	0.284464
Chr01	1.16638
Chr01	0.96514
Chr01	0.817875
Chr01	-0.352601
Chr01	-0.554823
Chr01	0.345151
Chr01	1.33662
Chr01	1.03758
Chr01	-0.0844617
Chr01	-0.0678261
Chr01	0.212117
Chr01	-0.553754
Chr01	1.51773
Chr01	0.55716
Chr01	0.140672
Chr01	0.0318003
Chr01	0.556814
Chr01	0.745526
Chr01	1.16366
Chr01	1.01418
Chr01	0.403042
Chr01	-0.0276006
Chr01	0.450517
Chr01	1.31817
Chr01	-0.310568
Chr01	0.587581
Chr01	0.587581
Chr01	0.30091
Chr01	-0.939234
Chr01	2.62243
Chr01	0.613604
Chr01	0.882671
Chr01	0.882671
Chr01	0.386065
Chr01	0.0727661
Chr01	-0.462204
Chr01	-0.462204
Chr01	1.28617
Chr01	-0.336896
Chr01	1.12274
Chr01	0.17295
Chr01	0.718083
Chr01	0.353023
Chr01	0.472879
Chr01	-23.691
Chr01	-0.428546
Chr01	8.99441
Chr01	0.390812
Chr01	0.421944
Chr01	-0.00203601
Chr01	0.555805
Chr01	1.18833
Chr01	1.00957
Chr01	-0.180242
Chr01	0.478493
Chr01	0.325093
Chr01	1.91438
Chr01	0.58246
Chr01	0.516744
Chr01	0.208007
Chr01	0.685067
Chr01	-0.557755
Chr01	1.00365
Chr01	1.00365
Chr01	0.564484
Chr01	0.242625
Chr01	0.572337
Chr01	0.484667
Chr01	0.740765
Chr01	1.07782
Chr01	0.350114
Chr01	-0.29996
Chr01	-0.195934
Chr01	0.590334
Chr01	0.590334
Chr01	0.752894
Chr01	0.773718
Chr01	-17.0336
Chr01	0.9986
Chr01	-16.7039
Chr01	-0.622437
Chr01	0.373649
Chr01	0.0131955
Chr01	-25.1854
Chr01	0.56827
Chr01	1.2183
Chr01	1.2183
Chr01	0.510311
Chr01	0.510311
Chr01	22.9472
Chr01	22.9472
Chr01	0.204208
Chr01	0.204208
Chr01	0.543837
Chr01	0.543837
Chr01	1.05134
Chr01	1.05134
Chr01	0.598424
Chr01	-0.250002
Chr01	-0.783739
Chr01	0.55718
Chr01	0.728214
Chr01	0.728214
Chr01	0.728214
Chr01	-0.900494
Chr01	1.02065
Chr01	0.149994
Chr01	0.149994
Chr01	0.149994
Chr01	0.149994
Chr01	0.149994
Chr01	0.149994
Chr01	0.149994
Chr01	0.149994
Chr01	0.149994
Chr01	0.149994
Chr01	0.149994
Chr01	0.149994
Chr01	24.0934
Chr01	-5.8576
Chr01	-5.8576
Chr01	-5.8576
Chr01	-5.8576
Chr01	-5.8576
Chr01	-5.8576
Chr01	-5.8576
Chr01	-5.8576
Chr01	-5.8576
Chr01	-5.8576
Chr01	-5.8576
Chr01	-5.8576
Chr01	-0.930292
Chr01	0.15497
Chr01	0.15497
Chr01	0.15497
Chr01	0.15497
Chr01	0.15497
Chr01	0.15497
Chr01	1.26643
Chr01	-0.274639
Chr01	0.106337
Chr01	2.50387
Chr01	-1.14752
Chr01	0.849072
Chr01	1.02064
Chr01	-1.35458
Chr01	-1.35458
Chr01	1.87991
Chr01	0.925655
Chr01	0.925655
Chr01	0.925655
Chr01	0.925655
Chr01	0.925655
Chr01	2.68507
Chr01	0.562079
Chr01	-0.1276
Chr01	-0.1276
Chr01	-0.1276
Chr01	-0.1276
Chr01	-0.064522
Chr01	0.995581
Chr01	-0.596142
Chr01	0.46358
Chr01	0.458482
Chr01	1.76622
Chr01	1.76622
Chr01	0.734579
Chr01	0.48349
Chr01	0.864451
Chr01	0.324731
Chr01	0.518727
Chr01	0.518727
Chr01	-0.237503
Chr01	0.620829
Chr01	-20.1535
Chr01	-13.7851
Chr01	-0.490679
Chr01	0.922753
Chr01	0.849989
Chr01	0.641
Chr01	-0.458372
Chr01	1.81336
Chr01	0.389508
Chr01	0.845763
Chr01	1.18432
Chr01	3.22895
Chr01	3.22895
Chr01	0.614246
Chr01	-3.54277
Chr01	0.235498
Chr01	0.357702
Chr01	1.53839
Chr01	-0.00638729
Chr01	0.33208
Chr01	0.385254
Chr01	0.410519
Chr01	0.107618
Chr01	0.371153
Chr01	-0.0443529
Chr01	-0.331339
Chr02	0.514637
Chr02	-0.230577
Chr02	0.1274
Chr02	0.0729714
Chr02	-0.301581
Chr02	0.00157718
Chr02	-0.257376
Chr02	-0.197368
Chr02	0.017355
Chr02	-0.99244
Chr02	-0.99244
Chr02	-0.99244
Chr02	-0.99244
Chr02	-0.99244
Chr02	-0.99244
Chr02	-0.99244
Chr02	-0.491718
Chr02	-0.491718
Chr02	-0.491718
Chr02	-0.491718
Chr02	-0.491718
Chr02	-0.491718
Chr02	-0.491718
Chr02	-0.738716
Chr02	-0.885611
Chr02	-0.885611
Chr02	-0.885611
Chr02	-0.885611
Chr02	-0.33704
Chr02	-0.232468
Chr02	-0.552581
Chr02	0.55247
Chr02	0.803947
Chr02	-0.286815
Chr02	0.11467
Chr02	-0.915657
Chr02	0.480739
Chr02	0.679752
Chr02	-1.10262
Chr02	0.869755
Chr02	0.670801
Chr02	0.732199
Chr02	0.389669
Chr02	0.411365
Chr02	0.100894
Chr02	-0.301547
Chr02	1.34857
Chr02	1.32854
Chr02	-0.00426506
Chr02	-0.00426506
Chr02	0.222517
Chr02	0.466992
Chr02	0.444866
Chr02	-0.132084
Chr02	0.917083
Chr02	0.192484
Chr02	0.192484
Chr02	1.4632
Chr02	0.613562
Chr02	-1.63649
Chr02	0.465568
Chr02	-0.129045
Chr02	-0.156396
Chr02	-0.0429969
Chr02	0.288393
Chr02	1.27163
Chr02	0.00785299
Chr02	-0.385686
Chr02	-0.385686
Chr02	0.457302
Chr02	0.104403
Chr02	-0.411759
Chr02	0.0857809
Chr02	0.250437
Chr02	0.17103
Chr02	-0.3143
Chr02	0.22496
Chr02	0.937148
Chr02	0.731588
Chr02	0.570191
Chr02	0.169944
Chr02	-0.39578
Chr02	-0.790838
Chr02	-0.0167614
Chr02	0.962544
Chr02	-0.793271
Chr02	0.286103
Chr02	0.776032
Chr02	0.540405
Chr02	0.432452
Chr02	0.115823
Chr02	-0.150887
Chr02	0.625565
Chr02	0.111192
Chr02	0.275505
Chr02	-1.08989
Chr02	-1.39624
Chr02	0.241717
Chr02	-1.67559
Chr02	0.406566
Chr02	-0.0806084
Chr02	0.091576
Chr02	-1.98626
Chr02	0.00386382
Chr02	0.13721
Chr02	-0.572646
Chr02	1.29717
Chr02	0.181985
Chr02	0.556117
Chr02	-0.535906
Chr02	0.139762
Chr02	0.329815
Chr02	0.0750446
Chr02	0.137055
Chr02	-0.209343
Chr02	0.659869
Chr02	0.871339
Chr02	0.602355
Chr02	-0.426975
Chr02	0.446735
Chr02	0.252811
Chr02	-0.62015
Chr02	-0.530557
Chr02	0.363973
Chr02	0.649502
Chr02	0.649502
Chr02	0.12264
Chr02	-0.173387
Chr02	-0.202689
Chr02	-0.588875
Chr02	0.126871
Chr02	1.0035
Chr02	-0.242697
Chr02	0.427758
Chr02	0.356399
Chr02	0.0665089
Chr02	-0.15165
Chr02	1.19717
Chr02	0.000732731
Chr02	0.283909
Chr02	-0.330067
Chr02	0.205258
Chr02	0.668322
Chr02	0.3333
Chr02	-0.606861
Chr02	-0.0510242
Chr02	-1.09219
Chr02	0.0433017
Chr02	-0.244996
Chr02	0.60778
Chr02	0.490033
Chr02	1.29756
Chr02	1.1755
Chr02	0.416622
Chr02	0.192973
Chr02	0.0465837
Chr02	0.437302
Chr02	0.1573
Chr02	0.0916386
Chr02	1.11674
Chr02	0.185511
Chr02	0.185511
Chr02	-1.39422
Chr02	0.957202
Chr02	0.365236
Chr02	0.417155
Chr02	-0.511391
Chr02	0.362576
Chr02	0.312941
Chr02	0.0338883
Chr02	-1.00697
Chr02	1.10198
Chr02	-0.0208815
Chr02	0.782827
Chr02	-1.32533
Chr02	0.988069
Chr02	-0.0294533
Chr02	-0.0250788
Chr02	-0.373773
Chr02	0.455088
Chr02	0.0207929
Chr02	-0.75826
Chr02	0.625374
Chr02	0.625374
Chr02	2.5192
Chr02	2.5192
Chr02	0.436719
Chr02	0.436719
Chr02	0.111288
Chr02	1.10079
Chr02	0.474622
Chr02	-0.0689969
Chr02	-0.0689969
Chr02	-0.0689969
Chr02	0.460704
Chr02	0.460704
Chr02	0.86271
Chr02	0.758935
Chr02	-0.298303
Chr02	0.17562
Chr02	-0.510296
Chr02	0.334242
Chr02	0.383206
Chr02	0.191525
Chr02	-0.335529
Chr02	0.887979
Chr03	0.91532
Chr03	0.481865
Chr03	-0.383177
Chr03	-0.081211
Chr03	0.805971
Chr03	0.343506
Chr03	0.318603
Chr03	-2.02709
Chr03	-0.521329
Chr03	-2.28606
Chr03	0.245435
Chr03	0.245435
Chr03	0.415257
Chr03	0.415257
Chr03	0.0850795
Chr03	-0.058577
Chr03	-0.15561
Chr03	-0.475638
Chr03	-0.0631088
Chr03	-0.573482
Chr03	0.376986
Chr03	0.322215
Chr03	0.469568
Chr03	0.0320309
Chr03	0.545683
Chr03	-0.44004
Chr03	-0.0854559
Chr03	0.503999
Chr03	0.182892
Chr03	0.988721
Chr03	0.586724
Chr03	0.109072
Chr03	-2.46769
Chr03	-0.327917
Chr03	0.759616
Chr03	1.10786
Chr03	-0.309751
Chr03	0.0603954
Chr03	0.318973
Chr03	0.0993743
Chr03	0.329594
Chr03	0.213934
Chr03	-0.225875
Chr03	-0.810553
Chr03	1.35934
Chr03	-0.658395
Chr03	1.07093
Chr03	0.0864554
Chr03	0.461156
Chr03	0.548312
Chr03	0.376732
Chr03	-0.374392
Chr03	0.0553106
Chr03	1.09915
Chr03	-0.810281
Chr03	0.54668
Chr03	0.579932
Chr03	-0.0020693
Chr03	-0.0020693
Chr03	0.0223402
Chr03	-0.270332
Chr03	0.201262
Chr03	0.356849
Chr03	-0.0207216
Chr03	0.19395
Chr03	1.90426
Chr03	0.113676
Chr03	-0.758096
Chr03	0.632723
Chr03	0.137547
Chr03	-0.314862
Chr03	1.1647
Chr03	-0.364756
Chr03	0.0678511
Chr03	0.0678511
Chr03	-0.383536
Chr03	0.376033
Chr03	-0.0757797
Chr03	1.02718
Chr03	-0.2702
Chr03	0.0277629
Chr03	0.0156119
Chr03	0.0156119
Chr03	-0.0508311
Chr03	1.2562
Chr03	0.372531
Chr03	-0.782777
Chr03	-0.25929
Chr03	-0.337564
Chr03	-0.564014
Chr03	0.469683
Chr03	-0.622255
Chr03	0.0029426
Chr03	-0.146134
Chr03	-0.126035
Chr03	0.0584673
Chr03	0.038362
Chr03	0.13978
Chr03	0.110234
Chr03	-0.246192
Chr03	-0.484331
Chr03	1.0849
Chr03	0.473046
Chr03	0.588058
Chr03	-0.223454
Chr03	-0.433117
Chr03	-0.314584
Chr03	-0.046239
Chr03	0.497884
Chr03	1.15677
Chr03	0.537473
Chr03	0.0474393
Chr03	-0.318168
Chr03	-1.5051
Chr03	-0.116341
Chr03	-0.0634946
Chr03	-0.298713
Chr03	-0.142809
Chr03	0.454012
Chr03	0.0172497
Chr03	0.186994
Chr03	0.418232
Chr03	1.49268
Chr03	2.90668
Chr03	0.288628
Chr03	-5.59126
Chr03	0.205044
Chr03	-0.562183
Chr03	0.289772
Chr03	-0.121692
Chr03	0.165395
Chr03	13.4792
Chr03	-21.6175
Chr03	0.0428618
Chr03	0.469618
Chr03	-0.540375
Chr03	0.0470709
Chr03	0.0403781
Chr03	0.228884
Chr03	0.269258
Chr03	-0.518631
Chr03	-0.305304
Chr03	-0.376307
Chr03	0.33116
Chr03	0.706488
Chr03	0.939765
Chr03	-0.0757262
Chr03	-0.2905
Chr03	0.79964
Chr03	-1.21599
Chr03	0.252939
Chr03	0.486246
Chr03	-0.107453
Chr03	0.688677
Chr03	0.0180684
Chr03	0.0246642
Chr03	0.138919
Chr03	0.0447838
Chr03	0.309878
Chr03	0.404892
Chr03	0.119329
Chr03	0.0358911
Chr03	0.0617873
Chr03	-0.0229348
Chr03	-1.07824
Chr03	0.250243
Chr03	0.120718
Chr03	0.416176
Chr03	0.416176
Chr03	0.542259
Chr03	0.0546569
Chr03	0.386595
Chr03	1.53495
Chr03	0.35665
Chr03	0.219846
Chr03	0.901703
Chr03	0.668393
Chr03	0.825362
Chr03	-0.0219246
Chr03	-0.895155
Chr03	0.231017
Chr03	-0.015902
Chr03	1.07093
Chr03	-0.317333
Chr03	0.142846
Chr03	0.55504
Chr03	0.198422
Chr03	0.180567
Chr03	0.637415
Chr03	0.0392024
Chr03	0.0355249
Chr03	-5.69122
Chr03	0.104464
Chr03	0.411101
Chr03	0.103082
Chr03	-0.1439
Chr03	0.110505
Chr03	0.334548
Chr03	0.0646481
Chr03	0.487113
Chr03	0.692652
Chr03	-0.779561
Chr03	0.371017
Chr03	0.0494136
Chr03	-0.469912
Chr03	0.30822
Chr03	-0.126014
Chr03	-0.211335
Chr03	0.315106
Chr03	0.152945
Chr03	0.127524
Chr03	0.134492
Chr03	0.0931068
Chr03	0.0931068
Chr03	-0.234192
Chr03	0.793703
Chr03	1.4872
Chr03	0.834295
Chr03	-0.0209801
Chr03	0.0157336
Chr03	-0.042244
Chr03	0.167906
Chr03	0.291428
Chr03	0.0994631
Chr03	0.996363
Chr03	0.491296
Chr03	0.122124
Chr03	0.601548
Chr03	0.215456
Chr03	0.215456
Chr03	1.10637
Chr03	-0.36121
Chr03	0.122171
Chr03	-1.31176
Chr03	-0.251369
Chr03	0.0953964
Chr03	0.1964
Chr03	0.585496
Chr03	0.585496
Chr03	-0.572208
Chr03	0.53907
Chr03	0.53907
Chr03	-0.129363
Chr03	-0.129363
Chr03	0.00287682
Chr03	0.317733
Chr03	0.638719
Chr03	-0.0456935
Chr03	0.317971
Chr03	0.0284627
Chr03	0.424251
Chr03	-0.128357
Chr03	0.329815
Chr03	-0.0303911
Chr03	0.76938
Chr03	0.400817
Chr03	16.1194
Chr03	-0.643295
Chr03	0.250288
Chr03	0.0238857
Chr03	0.0238857
Chr03	-0.0863733
Chr03	1.1236
Chr03	-0.121372
Chr03	-0.487296
Chr03	0.486632
Chr03	1.78524
Chr03	2.73673
Chr03	-0.667399
Chr03	1.0179
Chr03	-2.83152
Chr03	-0.234871
Chr03	1.17694
Chr03	-1.87097
Chr03	1.21308
Chr03	0.70879
Chr03	0.176076
Chr03	0.152617
Chr03	0.163827
Chr03	0.163827
Chr03	0.163827
Chr03	0.163827
Chr03	0.0519492
Chr03	-0.329378
Chr03	-0.329378
Chr03	0.091491
Chr03	-1.33263
Chr03	0.235423
Chr03	-0.0175854
Chr03	0.175768
Chr03	-0.712072
Chr03	0.335246
Chr03	0.335246
Chr03	0.0583071
Chr03	0.120575
Chr03	0.17508
Chr03	-0.117034
Chr03	0.454711
Chr03	-0.391755
Chr03	0.249104
Chr03	1.2297
Chr03	-0.68629
Chr03	0.903905
Chr03	0.190548
Chr03	0.309676
Chr03	1.12711
Chr03	0.352306
Chr03	7.46608
Chr03	0.0772463
Chr03	0.0703995
Chr03	1.0571
Chr03	0.0507429
Chr03	0.379947
Chr03	0.546594
Chr03	0.390089
Chr03	0.967255
Chr03	-0.287027
Chr03	-0.926041
Chr03	0.106582
Chr03	0.696407
Chr03	-0.0372511
Chr03	-0.0418314
Chr03	1.48708
Chr03	0.137815
Chr03	-0.0887975
Chr03	0.0530862
Chr03	-0.0789338
Chr03	0.36769
Chr03	0.239449
Chr03	0.333518
Chr03	0.232235
Chr03	0.402812
Chr03	0.69891
Chr03	0.217419
Chr03	0.252566
Chr03	0.187891
Chr03	-1.18311
Chr03	0.19467
Chr03	0.120095
Chr03	0.391173
Chr03	-0.260686
Chr03	1.1021
Chr03	-0.348874
Chr03	0.280253
Chr03	-0.0170241
Chr03	0.175022
Chr03	-0.291694
Chr03	-0.674645
Chr03	0.878002
Chr03	0.188773
Chr03	0.895778
Chr03	0.416771
Chr03	-0.075246
Chr03	0.096246
Chr03	-0.205296
Chr03	-0.0226153
Chr03	0.158639
Chr03	-0.754729
Chr03	-0.0671154
Chr03	0.461648
Chr03	0.885285
Chr03	0.514897
Chr03	0.336539
Chr03	0.189626
Chr03	-0.138125
Chr03	0.16125
Chr03	0.0446302
Chr03	0.0446302
Chr03	-0.0535534
Chr03	-0.416541
Chr03	1.11035
Chr03	-0.36394
Chr03	0.0477437
Chr03	0.577303
Chr03	-0.169247
Chr03	0.357116
Chr03	0.0396295
Chr03	0.0246111
Chr03	0.464425
Chr03	-0.243136
Chr03	0.581042
Chr03	0.139247
Chr03	-0.0253384
Chr03	0.04458
Chr03	0.21506
Chr03	-0.151854
Chr03	-0.317296
Chr03	0.0387183
Chr03	-0.23396
Chr03	0.719735
Chr03	-0.451244
Chr03	-0.000247478
Chr03	-0.189725
Chr03	-0.0702663
Chr03	0.326417
Chr03	-0.990171
Chr03	-0.990171
Chr03	-0.169267
Chr03	0.162697
Chr03	0.073263
Chr03	-0.10785
Chr03	-0.141637
Chr03	0.177018
Chr03	-0.223566
Chr03	0.15394
Chr03	0.461504
Chr03	-0.034238
Chr03	-0.00487528
Chr03	-0.624862
Chr03	0.382651
Chr03	0.207259
Chr03	-0.224779
Chr03	0.124817
Chr03	0.562842
Chr03	0.127258
Chr03	0.241366
Chr03	0.548376
Chr03	-0.251227
Chr03	-0.0643326
Chr03	0.0759903
Chr03	0.888717
Chr03	0.459521
Chr03	0.181861
Chr03	0.479398
Chr03	-0.618438
Chr03	0.905852
Chr03	0.371526
Chr03	0.0819278
Chr03	-0.0394401
Chr03	-0.0680095
Chr03	0.404166
Chr03	-0.110529
Chr03	-0.284537
Chr03	0.591466
Chr03	-1.86328
Chr03	1.17809
Chr03	0.756668
Chr03	0.743991
Chr03	-0.239801
Chr03	0.802157
Chr03	1.29863
Chr03	0.0310816
Chr03	-0.0156325
Chr03	0.614482
Chr03	0.0820864
Chr03	0.369614
Chr03	0.44515
Chr03	0.331808
Chr03	0.137953
Chr03	0.0720611
Chr03	0.391567
Chr03	-0.00040232
Chr03	0.380556
Chr03	0.152252
Chr03	-0.162516
Chr03	0.130198
Chr03	0.77067
Chr03	0.640606
Chr03	0.766843
Chr03	0.0391237
Chr03	0.125489
Chr03	0.0935615
Chr03	2.22168
Chr03	2.22168
Chr03	2.22168
Chr03	2.22168
Chr03	-1.03416
Chr03	-1.03416
Chr03	-1.03416
Chr03	-1.03416
Chr03	-0.926063
Chr03	-0.926063
Chr03	-0.926063
Chr03	-0.926063
Chr03	-0.171611
Chr03	-0.171611
Chr03	-0.171611
Chr03	-0.171611
Chr03	-0.171611
Chr03	-0.171611
Chr03	-0.171611
Chr03	-0.171611
Chr03	2.18921
Chr03	-0.182477
Chr03	-0.182749
Chr03	-0.429265
Chr03	0.251782
Chr03	0.83895
Chr03	0.00616822
Chr03	0.966759
Chr03	0.306887
Chr03	-7.03393
Chr03	-0.00676585
Chr03	0.392533
Chr03	0.288586
Chr03	0.390539
Chr03	0.214487
Chr03	-0.346004
Chr03	0.354216
Chr03	0.354216
Chr03	-0.154624
Chr03	0.419757
Chr03	0.28037
Chr03	1.30529
Chr03	0.22792
Chr03	0.22792
Chr03	0.22792
Chr03	0.22792
Chr03	-0.552505
Chr03	-0.552505
Chr03	-0.552505
Chr03	-0.552505
Chr03	-0.289921
Chr03	-1.16641
Chr03	0.416505
Chr03	0.895793
Chr03	0.35487
Chr03	-1.50521
Chr03	0.873771
Chr03	-0.0354066
Chr03	-1.06892
Chr03	0.996627
Chr03	0.326365
Chr03	0.326365
Chr03	-16.2473
Chr03	-16.2473
Chr03	0.115836
Chr03	-0.585673
Chr03	0.626127
Chr03	0.704355
Chr03	0.0386035
Chr03	0.716755
Chr03	-0.437627
Chr03	0.0981437
Chr03	-0.29911
Chr03	-0.306204
Chr03	0.369764
Chr03	-1.59751
Chr03	0.287896
Chr04	-0.922476
Chr04	0.0728449
Chr04	-1.8544
Chr04	-0.217345
Chr04	0.849338
Chr04	-0.289476
Chr04	-0.283505
Chr04	0.0155836
Chr04	-0.00316547
Chr04	-0.0046985
Chr04	-0.0322527
Chr04	0.564887
Chr04	-0.0675624
Chr04	0.413372
Chr04	-0.346732
Chr04	0.142702
Chr04	-1.40491
Chr04	-0.688942
Chr04	-0.361005
Chr04	1.67464
Chr04	1.13617
Chr04	0.825257
Chr04	0.0170795
Chr04	-0.858053
Chr04	-0.858053
Chr04	-0.0769729
Chr04	0.228242
Chr04	0.406998
Chr04	0.225066
Chr04	0.8109
Chr04	0.509189
Chr04	0.261067
Chr04	-0.192041
Chr04	-0.322677
Chr04	1.07964
Chr04	0.144914
Chr04	0.182286
Chr04	0.173991
Chr04	0.0676701
Chr04	0.365775
Chr04	-0.313067
Chr04	0.360221
Chr04	-0.0159459
Chr04	-0.711678
Chr04	0.216077
Chr04	1.86439
Chr04	-0.151604
Chr04	2.00507
Chr04	-0.0282972
Chr04	-1.47145
Chr04	0.0862567
Chr04	0.502389
Chr04	0.459277
Chr04	0.0269784
Chr04	0.373917
Chr04	0.108322
Chr04	0.524434
Chr04	-0.931235
Chr04	-0.0119065
Chr04	-0.19068
Chr04	-0.624729
Chr04	0.959684
Chr04	0.297865
Chr04	-0.03611
Chr04	0.269028
Chr04	0.115064
Chr04	-0.541472
Chr04	-0.349634
Chr04	0.205393
Chr04	0.426447
Chr04	0.411169
Chr04	-0.19173
Chr04	0.400614
Chr04	-0.184383
Chr04	-0.672198
Chr04	-0.25698
Chr04	-0.02153
Chr04	0.259381
Chr04	-0.318896
Chr04	0.694197
Chr04	1.46895
Chr04	1.46895
Chr04	7.66468
Chr04	7.66468
Chr04	7.93066
Chr04	7.93066
Chr04	0.815787
Chr04	0.299466
Chr04	0.299466
Chr04	0.79347
Chr04	0.123785
Chr04	-0.113558
Chr04	-0.430138
Chr04	0.737335
Chr04	0.737335
Chr04	0.056314
Chr04	0.367393
Chr04	0.138822
Chr04	-0.224182
Chr04	0.735469
Chr04	0.132786
Chr04	0.123596
Chr04	0.116844
Chr04	0.193422
Chr04	0.0257984
Chr04	0.300003
Chr04	-0.263795
Chr04	-0.255888
Chr04	-0.173195
Chr04	-0.688206
Chr04	-0.27799
Chr04	0.435944
Chr04	0.0573892
Chr04	-0.129138
Chr04	0.0209915
Chr04	-0.228028
Chr04	-1.33477
Chr04	-1.33477
Chr04	-1.33477
Chr04	0.515497
Chr04	1.3544
Chr04	-1.25244
Chr04	-0.130598
Chr04	-0.130598
Chr04	0.0261975
Chr04	0.105104
Chr04	0.0818535
Chr04	0.347636
Chr04	0.0807951
Chr04	0.272877
Chr04	0.598676
Chr04	0.324109
Chr04	-0.180613
Chr04	-0.136081
Chr04	0.120326
Chr04	0.0272386
Chr04	0.153012
Chr04	0.10781
Chr04	0.086328
Chr04	0.210999
Chr04	0.537158
Chr04	-0.286037
Chr04	-0.255864
Chr04	1.34726
Chr04	1.34726
Chr04	-2.17038
Chr04	0.589817
Chr04	0.415549
Chr04	-0.540646
Chr04	0.0263428
Chr04	0.84974
Chr04	-0.677157
Chr04	0.181458
Chr04	0.321956
Chr04	-0.0566118
Chr04	0.20472
Chr04	0.0253482
Chr04	0.359014
Chr04	1.01517
Chr04	0.536982
Chr04	-0.881951
Chr04	-0.825931
Chr04	0.749516
Chr04	0.809962
Chr04	0.676406
Chr04	-0.258018
Chr04	-0.174275
Chr04	-0.44337
Chr04	-0.108363
Chr04	0.0567252
Chr04	0.651654
Chr04	0.334833
Chr04	-0.0738674
Chr04	0.0520277
Chr04	-0.389729
Chr04	-0.97965
Chr04	0.140137
Chr04	-0.0223847
Chr04	1.23382
Chr04	0.853651
Chr04	-0.113588
Chr04	0.601151
Chr04	-0.156325
Chr04	-0.156325
Chr04	0.766355
Chr04	1.10915
Chr04	-0.68757
Chr04	-0.68757
Chr04	1.41642
Chr04	1.41642
Chr04	1.04488
Chr04	1.04488
Chr04	-0.996893
Chr04	0.414038
Chr04	0.414038
Chr04	0.1339
Chr04	0.0548536
Chr04	0.841479
Chr04	-0.121328
Chr04	-0.109368
Chr04	1.23944
Chr04	0.390057
Chr04	0.2871
Chr04	-0.465523
Chr04	0.341834
Chr04	0.585406
Chr04	0.585406
Chr04	0.0781461
Chr04	-0.669004
Chr04	0.273781
Chr04	0.192569
Chr04	-0.392292
Chr04	-0.26077
Chr04	0.503041
Chr04	0.503041
Chr04	0.120852
Chr04	0.412443
Chr04	0.205158
Chr04	0.0175837
Chr04	0.465278
Chr04	0.140436
Chr04	0.0973076
Chr04	-0.307637
Chr04	-0.129122
Chr04	-0.278953
Chr04	0.0413842
Chr04	0.0413842
Chr04	0.0413842
Chr04	0.0413842
Chr04	-0.0948168
Chr04	0.674609
Chr04	-0.0844524
Chr04	-0.234818
Chr04	-0.0163408
Chr04	0.458471
Chr04	-0.12042
Chr04	0.393669
Chr04	0.0151209
Chr04	0.319815
Chr04	0.319815
Chr04	0.431027
Chr04	0.245843
Chr04	0.717215
Chr04	-0.000238528
Chr04	0.0544903
Chr04	0.121492
Chr04	0.373029
Chr04	0.040029
Chr04	0.303151
Chr04	-0.0415455
Chr04	0.780621
Chr04	0.0278611
Chr04	-0.0488684
Chr04	0.354211
Chr04	0.703083
Chr04	-1.184
Chr04	0.699987
Chr04	-0.0514838
Chr04	-0.147311
Chr04	0.121199
Chr04	0.625496
Chr04	0.551817
Chr04	1.19018
Chr04	0.116201
Chr04	-0.294604
Chr04	0.56695
Chr04	0.518926
Chr04	2.43193
Chr04	-0.325037
Chr04	-0.518797
Chr04	0.262253
Chr04	0.229576
Chr04	0.667858
Chr04	0.0802859
Chr04	0.451194
Chr04	0.68025
Chr04	0.368407
Chr04	0.226829
Chr04	-0.32925
Chr04	1.0423
Chr04	0.428336
Chr04	1.63979
Chr04	0.0497089
Chr04	-1.50875
Chr04	0.651636
Chr04	0.651636
Chr04	-0.00849313
Chr04	0.0862399
Chr04	-0.871348
Chr04	0.306839
Chr04	0.80849
Chr04	-0.261397
Chr04	1.04823
Chr04	0.0393057
Chr04	0.159516
Chr04	5.42274
Chr04	-0.120896
Chr04	0.0107843
Chr04	-0.293832
Chr04	0.0757424
Chr04	0.941157
Chr04	-0.0329058
Chr04	-0.680263
Chr04	0.919178
Chr04	-0.164304
Chr04	0.546272
Chr04	-0.123408
Chr04	0.642647
Chr04	0.0719987
Chr04	0.466892
Chr04	-0.0182387
Chr04	1.26873
Chr04	1.26873
Chr04	-0.107951
Chr04	0.83845
Chr04	0.00734375
Chr04	-2.02609
Chr04	-0.0858878
Chr04	-0.147763
Chr04	0.46136
Chr04	-0.13898
Chr04	-0.13898
Chr04	0.103271
Chr04	-0.217605
Chr04	0.138752
Chr04	0.00256795
Chr04	0.548384
Chr04	0.671904
Chr04	-2.94525
Chr04	0.601783
Chr04	0.24272
Chr04	-0.138042
Chr04	-0.685147
Chr04	0.190137
Chr04	0.17927
Chr04	-1.26211
Chr04	0.342966
Chr04	0.272271
Chr04	-0.125568
Chr04	0.158305
Chr04	-1.31699
Chr04	0.364397
Chr04	-0.0605403
Chr04	0.196908
Chr04	-0.12902
Chr04	-0.12902
Chr04	0.149447
Chr04	0.146837
Chr04	0.309127
Chr04	0.00675312
Chr04	0.388623
Chr04	0.53681
Chr04	0.742352
Chr04	0.290592
Chr04	0.290592
Chr04	0.321761
Chr04	0.167088
Chr04	0.449378
Chr04	0.378972
Chr04	0.246609
Chr04	-0.156263
Chr04	-0.915145
Chr04	-0.0412336
Chr04	-0.133716
Chr04	1.16395
Chr04	-0.897681
Chr04	0.780144
Chr04	0.662899
Chr04	-0.350685
Chr04	0.04446
Chr04	0.04446
Chr04	0.04446
Chr04	0.0570389
Chr04	0.354766
Chr04	-2.42242
Chr04	-0.342595
Chr04	0.00821888
Chr04	0.0464411
Chr04	0.142356
Chr04	0.43669
Chr04	0.573536
Chr04	-0.0251006
Chr04	0.663752
Chr04	-0.419199
Chr04	0.198102
Chr04	0.839574
Chr04	-3.08565
Chr04	-0.84529
Chr04	-0.101958
Chr04	0.339743
Chr04	0.783235
Chr04	-0.50338
Chr04	0.411149
Chr04	0.241336
Chr04	0.450309
Chr04	0.0881003
Chr04	-0.419428
Chr04	0.093721
Chr04	0.320816
Chr04	0.642168
Chr04	0.257931
Chr04	0.696674
Chr04	-0.697776
Chr04	0.851566
Chr04	0.988346
Chr04	0.262784
Chr04	-0.612244
Chr04	0.732912
Chr04	0.411909
Chr04	-0.035233
Chr04	0.341567
Chr04	0.0844166
Chr04	0.363521
Chr04	0.425981
Chr04	0.463444
Chr04	0.975999
Chr04	0.0683782
Chr04	-0.134039
Chr04	-0.134039
Chr04	0.0855304
Chr04	-0.108754
Chr04	1.13559
Chr04	0.646108
Chr04	-0.196263
Chr04	5.95501
Chr04	-0.813696
Chr04	-0.813696
Chr04	0.0469312
Chr04	3.06626
Chr04	0.422994
Chr04	0.744514
Chr04	0.101028
Chr04	0.266323
Chr04	1.95525
Chr04	-0.227188
Chr04	-0.483854
Chr04	-0.0561694
Chr04	-0.14093
Chr04	0.0715467
Chr04	-0.471724
Chr04	0.647719
Chr04	0.31759
Chr04	0.0861168
Chr04	0.129111
Chr04	0.223775
Chr04	0.44699
Chr04	0.303311
Chr04	0.303311
Chr04	0.0906767
Chr04	-0.97335
Chr04	-0.232263
Chr04	-0.230219
Chr04	0.432041
Chr04	0.0868281
Chr04	0.0310672
Chr04	0.337374
Chr04	0.195187
Chr04	-2.36011
Chr04	0.277469
Chr04	0.167386
Chr04	1.54099
Chr04	-0.238178
Chr04	-0.502703
Chr04	1.11294
Chr04	0.117256
Chr04	0.674895
Chr04	1.53759
Chr04	0.36048
Chr04	0.249308
Chr04	0.21018
Chr04	0.128815
Chr04	0.602916
Chr04	0.553886
Chr04	-0.534087
Chr04	-0.534087
Chr04	0.295469
Chr04	0.324117
Chr04	0.23087
Chr04	-0.660694
Chr04	0.366741
Chr04	0.106503
Chr04	-0.751186
Chr04	-1.48706
Chr04	-16.8004
Chr04	-31.963
Chr04	0.314418
Chr04	-0.284021
Chr04	0.336006
Chr04	-0.199583
Chr04	1.01428
Chr04	0.416097
Chr04	0.131252
Chr04	0.0882162
Chr04	0.0465708
Chr04	0.310084
Chr04	-0.0341452
Chr04	-0.520994
Chr04	-0.373658
Chr04	-0.314946
Chr04	-0.0802881
Chr04	0.976678
Chr04	-0.48937
Chr04	0.654279
Chr04	0.539398
Chr04	0.146268
Chr04	0.337597
Chr04	1.01363
Chr04	0.0903279
Chr04	-0.0555569
Chr04	0.0278881
Chr04	-0.0751687
Chr04	0.423125
Chr04	0.332195
Chr04	0.203319
Chr04	0.201802
Chr04	-0.270055
Chr04	-0.269821
Chr04	-0.0484375
Chr04	0.13389
Chr04	0.0138221
Chr04	0.0211724
Chr04	-0.105342
Chr04	0.0126532
Chr04	0.0126532
Chr04	-0.500289
Chr04	-0.605813
Chr04	0.619106
Chr04	-0.130893
Chr04	1.22584
Chr04	-0.730114
Chr04	-0.730114
Chr04	-0.730114
Chr04	-0.730114
Chr04	-0.730114
Chr04	-0.730114
Chr04	-0.387482
Chr04	0.790727
Chr04	-0.214978
Chr04	-0.214978
Chr04	0.659569
Chr04	-0.0254956
Chr04	0.0728196
Chr04	-1.44035
Chr04	0.774918
Chr04	0.166591
Chr04	0.166591
Chr04	0.406258
Chr04	0.858352
Chr04	0.0611445
Chr04	0.203162
Chr04	0.203162
Chr04	0.641858
Chr04	0.36409
Chr04	-0.00392511
Chr04	-0.273667
Chr04	-0.273667
Chr04	-0.119136
Chr04	-1.05467
Chr04	0.134059
Chr04	0.0403886
Chr04	1.09493
Chr04	0.209244
Chr04	0.266459
Chr04	0.266459
Chr04	0.489064
Chr04	0.568021
Chr04	0.568021
Chr04	0.638968
Chr04	0.754725
Chr04	0.110684
Chr04	0.272425
Chr04	-2.25217
Chr04	-0.793043
Chr04	-0.0439674
Chr04	0.50176
Chr04	0.353767
Chr04	0.789991
Chr04	0.286057
Chr04	0.125652
Chr04	0.252887
Chr04	0.559924
Chr04	0.36645
Chr04	0.36645
Chr04	0.252932
Chr04	0.226659
Chr04	0.226659
Chr04	0.456265
Chr04	0.230051
Chr04	-0.00607519
Chr04	0.268221
Chr04	0.0301016
Chr04	-0.0430244
Chr04	0.235692
Chr04	-0.115806
Chr04	-0.0353346
Chr04	1.41163
Chr04	0.404133
Chr04	0.404133
Chr04	0.404133
Chr04	0.404133
Chr04	-0.931177
Chr04	-0.544677
Chr04	-0.544677
Chr04	0.0376149
Chr04	0.0376149
Chr04	0.334604
Chr04	0.0109243
Chr04	-0.204748
Chr04	0.278642
Chr04	0.996897
Chr04	0.176498
Chr04	0.641962
Chr04	0.219121
Chr04	-0.558186
Chr04	0.685162
Chr04	0.211345
[truncated: 14,604 more rows]
