# Supplementary material for: Prophage-encoded Hm-oscar gene recapitulates Wolbachia-induced male-killing in the tea tortrix moth Homona magnanima
Source: eLife. 2025 Apr 14;13:RP101101. doi: 10.7554/eLife.101101 (PMC11996169; doi:10.7554/eLife.101101)
Supplement: Figure 3—source data 2. [file elife-101101-fig3-data2.xlsx]

## Sheet: Steel.Dwass Fig.3a-Osc
	comparison	t.value	p.value		Label	Comparison	Chr01	Chr02	Chr03	Chr04	Chr05	Chr06	Chr07	Chr08	Chr09	Chr10	Chr11	Chr12	Chr13	Chr14	Chr15	Chr16	Chr17	Chr18	Chr19	Chr20	Chr21	Chr22	Chr23	Chr24	Chr25	Chr26	Chr27	Chr28
1	Chr01:Chr02	6.03398	5.9936e-07		A	Chr01	NA	Yes	Yes	Yes	Yes	Yes	Yes	Yes	Yes	Yes	Yes	Yes	Yes	Yes	No	Yes	Yes	Yes	No	Yes	Yes	Yes	Yes	Yes	Yes	Yes	No	Yes
2	Chr01:Chr03	8.21585	4.03677e-13		BCD	Chr02	Yes	NA	No	No	No	No	No	No	No	No	No	No	No	No	Yes	No	No	No	Yes	No	No	No	No	No	No	No	Yes	No
3	Chr01:Chr04	7.40052	5.14221e-11		D	Chr03	Yes	No	NA	No	No	No	No	No	No	No	No	No	No	No	Yes	No	No	No	Yes	No	No	No	No	No	Yes	No	Yes	No
4	Chr01:Chr05	7.86927	1.75093e-12		BDE	Chr04	Yes	No	No	NA	No	No	No	No	No	No	No	No	No	Yes	Yes	No	No	No	No	No	No	No	No	No	No	No	Yes	No
5	Chr01:Chr06	7.92279	1.27076e-12		BCD	Chr05	Yes	No	No	No	NA	No	No	No	No	No	No	No	No	No	Yes	No	No	No	Yes	No	No	No	No	No	No	No	Yes	No
6	Chr01:Chr07	7.49333	2.554e-11		D	Chr06	Yes	No	No	No	No	NA	No	No	No	No	No	No	No	No	Yes	No	No	No	Yes	No	No	No	No	No	Yes	No	Yes	No
7	Chr01:Chr08	8.17538	4.43756e-13		BCD	Chr07	Yes	No	No	No	No	No	NA	No	No	No	No	No	No	No	Yes	No	No	No	Yes	No	No	No	No	No	No	No	Yes	No
8	Chr01:Chr09	7.75702	3.44702e-12		D	Chr08	Yes	No	No	No	No	No	No	NA	No	No	No	No	No	No	Yes	No	No	No	Yes	No	No	No	No	No	Yes	No	Yes	No
9	Chr01:Chr10	8.45647	2.85105e-13		BCD	Chr09	Yes	No	No	No	No	No	No	No	NA	No	No	No	No	No	Yes	No	No	No	Yes	No	No	No	No	No	No	No	Yes	No
10	Chr01:Chr11	8.9084	2.01283e-13		BCD	Chr10	Yes	No	No	No	No	No	No	No	No	NA	No	No	No	No	Yes	No	No	No	Yes	No	No	No	No	No	No	No	Yes	No
11	Chr01:Chr12	7.42921	4.14468e-11		D	Chr11	Yes	No	No	No	No	No	No	No	No	No	NA	No	No	No	Yes	No	No	No	Yes	No	No	No	No	No	Yes	No	Yes	No
12	Chr01:Chr13	7.88498	1.59306e-12		BCD	Chr12	Yes	No	No	No	No	No	No	No	No	No	No	NA	No	No	Yes	No	No	No	Yes	No	No	No	No	No	No	No	Yes	No
13	Chr01:Chr14	9.001	1.88405e-13		D	Chr13	Yes	No	No	No	No	No	No	No	No	No	No	No	NA	No	Yes	No	No	No	Yes	No	No	No	No	No	Yes	No	Yes	No
14	Chr01:Chr15	1.26771	0.999984		DE	Chr14	Yes	No	No	Yes	No	No	No	No	No	No	No	No	No	NA	Yes	No	No	No	Yes	No	No	Yes	No	No	Yes	No	Yes	No
15	Chr01:Chr16	7.07194	5.77183e-10		A	Chr15	No	Yes	Yes	Yes	Yes	Yes	Yes	Yes	Yes	Yes	Yes	Yes	Yes	Yes	NA	Yes	Yes	Yes	No	Yes	Yes	No	Yes	Yes	Yes	Yes	No	Yes
16	Chr01:Chr17	8.10657	5.42899e-13		BCD	Chr16	Yes	No	No	No	No	No	No	No	No	No	No	No	No	No	Yes	NA	No	No	Yes	No	No	No	No	No	No	No	Yes	No
17	Chr01:Chr18	6.99173	1.0254e-09		BCD	Chr17	Yes	No	No	No	No	No	No	No	No	No	No	No	No	No	Yes	No	NA	No	Yes	No	No	No	No	No	No	No	Yes	No
18	Chr01:Chr19	3.61347	0.069766		BD	Chr18	Yes	No	No	No	No	No	No	No	No	No	No	No	No	No	Yes	No	No	NA	No	No	No	No	No	No	No	No	Yes	No
19	Chr01:Chr20	7.685	5.94258e-12		AB	Chr19	No	Yes	Yes	No	Yes	Yes	Yes	Yes	Yes	Yes	Yes	Yes	Yes	Yes	No	Yes	Yes	No	NA	Yes	Yes	No	Yes	Yes	No	No	No	Yes
20	Chr01:Chr21	8.94399	1.95066e-13		D	Chr20	Yes	No	No	No	No	No	No	No	No	No	No	No	No	No	Yes	No	No	No	Yes	NA	No	No	No	No	Yes	No	Yes	No
21	Chr01:Chr22	5.84352	1.90687e-06		D	Chr21	Yes	No	No	No	No	No	No	No	No	No	No	No	No	No	Yes	No	No	No	Yes	No	NA	No	No	No	Yes	No	Yes	No
22	Chr01:Chr23	8.06512	6.34715e-13		BCDF	Chr22	Yes	No	No	No	No	No	No	No	No	No	No	No	No	Yes	No	No	No	No	No	No	No	NA	No	No	No	No	No	No
23	Chr01:Chr24	8.54507	2.61902e-13		D	Chr23	Yes	No	No	No	No	No	No	No	No	No	No	No	No	No	Yes	No	No	No	Yes	No	No	No	NA	No	Yes	No	Yes	No
24	Chr01:Chr25	4.94762	0.00026526		D	Chr24	Yes	No	No	No	No	No	No	No	No	No	No	No	No	No	Yes	No	No	No	Yes	No	No	No	No	NA	Yes	No	Yes	No
25	Chr01:Chr26	5.25266	5.44405e-05		BC	Chr25	Yes	No	Yes	No	No	Yes	No	Yes	No	No	Yes	No	Yes	Yes	Yes	No	No	No	No	Yes	Yes	No	Yes	Yes	NA	No	No	No
26	Chr01:Chr27	3.22914	0.210408		BD	Chr26	Yes	No	No	No	No	No	No	No	No	No	No	No	No	No	Yes	No	No	No	No	No	No	No	No	No	No	NA	Yes	No
27	Chr01:Chr28	6.38359	6.51156e-08		AC	Chr27	No	Yes	Yes	Yes	Yes	Yes	Yes	Yes	Yes	Yes	Yes	Yes	Yes	Yes	No	Yes	Yes	Yes	No	Yes	Yes	No	Yes	Yes	No	Yes	NA	Yes
28	Chr11:Chr15	8.35614	3.13971e-13		BCD	Chr28	Yes	No	No	No	No	No	No	No	No	No	No	No	No	No	Yes	No	No	No	Yes	No	No	No	No	No	No	No	Yes	NA
29	Chr15:Chr21	8.34265	3.24185e-13
30	Chr14:Chr15	8.29134	3.4539e-13
31	Chr15:Chr24	7.88976	1.54099e-12
32	Chr10:Chr15	7.87919	1.64924e-12
33	Chr03:Chr15	7.5035	2.36491e-11
34	Chr08:Chr15	7.47981	2.82939e-11
35	Chr15:Chr17	7.41077	4.76107e-11
36	Chr15:Chr23	7.37353	6.29521e-11
37	Chr06:Chr15	7.20879	2.13411e-10
38	Chr13:Chr15	7.16214	3.00189e-10
39	Chr05:Chr15	7.15435	3.1771e-10
40	Chr15:Chr20	7.09458	4.90174e-10
41	Chr09:Chr15	7.05314	6.60757e-10
42	Chr07:Chr15	6.74374	5.82427e-09
43	Chr12:Chr15	6.71654	7.02065e-09
44	Chr04:Chr15	6.60663	1.48237e-08
45	Chr15:Chr16	6.33121	9.15194e-08
46	Chr15:Chr18	6.2033	2.07712e-07
47	Chr15:Chr28	5.71277	4.13109e-06
48	Chr02:Chr15	5.36191	3.01204e-05
49	Chr15:Chr22	4.92019	0.000304297
50	Chr15:Chr26	4.46062	0.00266159
51	Chr15:Chr25	3.944	0.0220878
52	Chr15:Chr19	2.45181	0.783614
53	Chr15:Chr27	2.30753	0.869272
54	Chr14:Chr27	7.46496	3.16531e-11
55	Chr21:Chr27	7.242	1.67178e-10
56	Chr11:Chr27	6.5343	2.40847e-08
57	Chr24:Chr27	6.36478	7.36041e-08
58	Chr17:Chr27	6.34467	8.38731e-08
59	Chr03:Chr27	6.28292	1.24948e-07
60	Chr20:Chr27	6.21298	1.95333e-07
61	Chr10:Chr27	6.1966	2.16724e-07
62	Chr06:Chr27	6.19545	2.18314e-07
63	Chr08:Chr27	6.16834	2.59123e-07
64	Chr23:Chr27	5.95058	9.99464e-07
65	Chr13:Chr27	5.9317	1.121e-06
66	Chr09:Chr27	5.80161	2.4478e-06
67	Chr05:Chr27	5.73404	3.64734e-06
68	Chr12:Chr27	5.59535	8.14779e-06
69	Chr07:Chr27	5.56557	9.65755e-06
70	Chr18:Chr27	5.31292	3.93393e-05
71	Chr27:Chr28	5.04417	0.000162504
72	Chr04:Chr27	5.00702	0.000196468
73	Chr16:Chr27	4.82545	0.000485697
74	Chr02:Chr27	4.37052	0.00394991
75	Chr26:Chr27	3.8479	0.0314058
76	Chr22:Chr27	3.60811	0.0709759
77	Chr25:Chr27	1.92967	0.981761
78	Chr19:Chr27	0.433801	1
79	Chr14:Chr19	6.23926	1.65234e-07
80	Chr11:Chr19	5.35819	3.07391e-05
81	Chr19:Chr21	5.18976	7.61016e-05
82	Chr08:Chr19	5.01401	0.000189596
83	Chr19:Chr20	4.93699	0.000279786
84	Chr19:Chr24	4.91903	0.000306065
85	Chr19:Chr23	4.87929	0.00037284
86	Chr03:Chr19	4.87902	0.000373343
87	Chr06:Chr19	4.75336	0.000688397
88	Chr17:Chr19	4.67558	0.000996054
89	Chr13:Chr19	4.66932	0.0010258
90	Chr10:Chr19	4.65661	0.00108881
91	Chr07:Chr19	4.39274	0.00358696
92	Chr16:Chr19	4.21057	0.00775599
93	Chr05:Chr19	4.34323	0.0044424
94	Chr09:Chr19	4.315	0.00501152
95	Chr19:Chr28	3.93049	0.0232275
96	Chr12:Chr19	4.02515	0.0162346
97	Chr02:Chr19	3.90394	0.0256219
98	Chr04:Chr19	3.63049	0.0660371
99	Chr18:Chr19	3.60324	0.0720914
100	Chr19:Chr26	2.55761	0.707469
101	Chr19:Chr22	2.40301	0.815191
102	Chr19:Chr25	1.3672	0.999931
103	Chr14:Chr25	5.56672	9.59462e-06
104	Chr11:Chr25	4.1655	0.00932208
105	Chr21:Chr25	4.22137	0.00741843
106	Chr20:Chr25	4.04423	0.0150795
107	Chr08:Chr25	4.02842	0.0160312
108	Chr03:Chr25	3.94016	0.0224067
109	Chr06:Chr25	3.84761	0.0314386
110	Chr23:Chr25	3.83323	0.0330995
111	Chr13:Chr25	3.77477	0.0406663
112	Chr24:Chr25	3.76843	0.0415716
113	Chr17:Chr25	3.71721	0.0495429
114	Chr10:Chr25	3.49745	0.100129
115	Chr07:Chr25	3.43245	0.121338
116	Chr25:Chr28	3.29679	0.176724
117	Chr09:Chr25	3.29531	0.177419
118	Chr05:Chr25	3.24333	0.202996
119	Chr02:Chr25	3.1875	0.23321
120	Chr16:Chr25	3.11336	0.277704
121	Chr12:Chr25	3.10065	0.285817
122	Chr18:Chr25	2.76106	0.543319
123	Chr04:Chr25	2.47364	0.768709
124	Chr25:Chr26	1.70107	0.996973
125	Chr22:Chr25	1.34868	0.999947
126	Chr04:Chr14	3.74778	0.04464
127	Chr14:Chr22	4.09167	0.0125242
128	Chr10:Chr14	3.1658	0.245724
129	Chr14:Chr18	2.93031	0.406954
130	Chr14:Chr26	2.90188	0.429078
131	Chr05:Chr14	2.83437	0.483107
132	Chr14:Chr24	2.82	0.494823
133	Chr09:Chr14	2.81302	0.500532
134	Chr12:Chr14	2.69329	0.599263
135	Chr08:Chr22	2.56718	0.70015
136	Chr21:Chr22	2.56226	0.703918
137	Chr11:Chr22	2.50049	0.749766
138	Chr20:Chr22	2.72293	0.574838
139	Chr14:Chr21	2.46936	0.771667
140	Chr06:Chr22	2.44781	0.786293
141	Chr22:Chr23	2.43141	0.797115
142	Chr03:Chr22	2.37774	0.830526
143	Chr14:Chr17	2.37587	0.831633
144	Chr13:Chr22	2.3098	0.86811
145	Chr11:Chr14	2.29151	0.877286
146	Chr14:Chr16	2.27591	0.884795
147	Chr22:Chr28	2.22603	0.906814
148	Chr02:Chr22	2.20409	0.915548
149	Chr17:Chr22	2.17549	0.926079
150	Chr04:Chr20	2.09126	0.951719
151	Chr07:Chr22	2.07703	0.955307
152	Chr22:Chr24	2.07174	0.956587
153	Chr07:Chr14	2.03347	0.965058
154	Chr13:Chr14	2.02896	0.965965
155	Chr14:Chr23	2.00955	0.969674
156	Chr03:Chr14	2.00901	0.969772
157	Chr04:Chr08	1.99902	0.971549
158	Chr06:Chr14	1.89643	0.985487
159	Chr10:Chr22	1.84463	0.990045
160	Chr04:Chr06	1.83816	0.990521
161	Chr03:Chr04	1.82066	0.991714
162	Chr04:Chr11	1.80187	0.992853
163	Chr04:Chr23	1.78857	0.993578
164	Chr16:Chr22	1.76603	0.994666
165	Chr08:Chr14	1.75945	0.994953
166	Chr04:Chr13	1.75536	0.995124
167	Chr04:Chr21	1.75314	0.995215
168	Chr04:Chr28	1.71042	0.996706
169	Chr02:Chr04	1.70747	0.996792
170	Chr20:Chr26	1.68912	0.997287
171	Chr12:Chr22	1.66843	0.997764
172	Chr05:Chr22	1.65479	0.998038
173	Chr09:Chr22	1.65003	0.998126
174	Chr02:Chr26	1.60033	0.998862
175	Chr26:Chr28	1.51163	0.999569
176	Chr08:Chr26	1.51025	0.999576
177	Chr04:Chr07	1.50132	0.999618
178	Chr04:Chr17	1.4923	0.999657
179	Chr06:Chr26	1.45371	0.999785
180	Chr21:Chr26	1.39744	0.999896
181	Chr03:Chr26	1.39222	0.999903
182	Chr05:Chr20	1.35316	0.999944
183	Chr02:Chr10	1.35176	0.999945
184	Chr04:Chr24	1.35109	0.999945
185	Chr18:Chr22	1.34983	0.999946
186	Chr23:Chr26	1.32243	0.999964
187	Chr18:Chr20	1.31967	0.999965
188	Chr13:Chr26	1.30623	0.999972
189	Chr11:Chr26	1.30587	0.999972
190	Chr14:Chr20	1.25187	0.999988
191	Chr07:Chr26	1.22424	0.999992
192	Chr02:Chr18	1.20911	0.999994
193	Chr09:Chr20	1.20771	0.999994
194	Chr10:Chr20	1.19123	0.999996
195	Chr08:Chr18	1.18264	0.999996
196	Chr02:Chr05	1.16374	0.999997
197	Chr10:Chr28	1.15986	0.999997
198	Chr18:Chr28	1.15924	0.999998
199	Chr14:Chr28	1.14677	0.999998
200	Chr05:Chr08	1.12766	0.999999
201	Chr12:Chr20	1.12322	0.999999
202	Chr04:Chr16	1.11746	0.999999
203	Chr08:Chr10	1.11612	0.999999
204	Chr17:Chr26	1.10042	0.999999
205	Chr05:Chr28	1.09048	0.999999
206	Chr06:Chr18	1.08749	0.999999
207	Chr16:Chr20	1.06328	1
208	Chr02:Chr12	1.0424	1
209	Chr03:Chr10	1.0402	1
210	Chr05:Chr06	1.039	1
211	Chr20:Chr24	1.03496	1
212	Chr03:Chr18	1.0297	1
213	Chr04:Chr10	1.00776	1
214	Chr09:Chr28	1.00323	1
215	Chr02:Chr14	1.00309	1
216	Chr08:Chr09	0.995001	1
217	Chr05:Chr21	0.994979	1
218	Chr13:Chr18	0.983058	1
219	Chr18:Chr23	0.974891	1
220	Chr24:Chr26	0.972687	1
221	Chr02:Chr24	0.971005	1
222	Chr12:Chr28	0.963725	1
223	Chr02:Chr09	0.95706	1
224	Chr08:Chr12	0.952497	1
225	Chr03:Chr05	0.952173	1
226	Chr06:Chr09	0.951127	1
227	Chr02:Chr16	0.938673	1
228	Chr16:Chr26	0.934325	1
229	Chr04:Chr12	0.928004	1
230	Chr05:Chr23	0.909415	1
231	Chr18:Chr21	0.907634	1
232	Chr04:Chr09	0.899079	1
233	Chr04:Chr05	0.893662	1
234	Chr05:Chr13	0.885269	1
235	Chr06:Chr10	0.878643	1
236	Chr04:Chr22	0.873003	1
237	Chr06:Chr12	0.860826	1
238	Chr10:Chr13	0.860121	1
239	Chr10:Chr23	0.853461	1
240	Chr03:Chr09	0.848723	1
241	Chr11:Chr18	0.841071	1
242	Chr08:Chr24	0.838981	1
243	Chr05:Chr11	0.836472	1
244	Chr24:Chr28	0.835988	1
245	Chr07:Chr10	0.829997	1
246	Chr16:Chr28	0.82326	1
247	Chr02:Chr17	0.804578	1
248	Chr03:Chr12	0.801112	1
249	Chr09:Chr21	0.793485	1
250	Chr17:Chr20	0.789384	1
251	Chr11:Chr20	0.774026	1
252	Chr07:Chr18	0.772899	1
253	Chr09:Chr13	0.770326	1
254	Chr09:Chr23	0.753758	1
255	Chr12:Chr26	0.753643	1
256	Chr10:Chr26	0.742178	1
257	Chr09:Chr26	0.728279	1
258	Chr10:Chr11	0.724243	1
259	Chr12:Chr13	0.720728	1
260	Chr12:Chr23	0.718789	1
261	Chr17:Chr18	0.714701	1
262	Chr05:Chr07	0.692004	1
263	Chr17:Chr28	0.674779	1
264	Chr05:Chr26	0.673515	1
265	Chr09:Chr11	0.670698	1
266	Chr06:Chr24	0.664674	1
267	Chr12:Chr21	0.664137	1
268	Chr02:Chr23	0.655921	1
269	Chr04:Chr18	0.655818	1
270	Chr07:Chr20	0.653596	1
271	Chr02:Chr11	0.650056	1
272	Chr03:Chr24	0.644314	1
273	Chr22:Chr26	0.640469	1
274	Chr11:Chr28	0.63784	1
275	Chr07:Chr09	0.626005	1
276	Chr05:Chr17	0.625019	1
277	Chr02:Chr21	0.62087	1
278	Chr13:Chr24	0.617288	1
279	Chr11:Chr12	0.612342	1
280	Chr20:Chr23	0.607762	1
281	Chr02:Chr03	0.522975	1
282	Chr02:Chr06	0.440209	1
283	Chr02:Chr07	0.446114	1
284	Chr02:Chr08	0.450484	1
285	Chr02:Chr13	0.587526	1
286	Chr02:Chr20	0.0154733	1
287	Chr02:Chr28	0.088144	1
288	Chr03:Chr06	0.10878	1
289	Chr03:Chr07	0.0925535	1
290	Chr03:Chr08	0.186119	1
291	Chr03:Chr11	0.211722	1
292	Chr03:Chr13	0.0282569	1
293	Chr03:Chr16	0.50077	1
294	Chr03:Chr17	0.368121	1
295	Chr03:Chr20	0.499928	1
296	Chr03:Chr21	0.215598	1
297	Chr03:Chr23	0.049088	1
298	Chr03:Chr28	0.385023	1
299	Chr04:Chr26	0.0440784	1
300	Chr05:Chr09	0.0615314	1
301	Chr05:Chr10	0.203669	1
302	Chr05:Chr12	0.136675	1
303	Chr05:Chr16	0.315386	1
304	Chr05:Chr18	0.107967	1
305	Chr05:Chr24	0.462861	1
306	Chr06:Chr07	0.26251	1
307	Chr06:Chr08	0.0861072	1
308	Chr06:Chr11	0.374186	1
309	Chr06:Chr13	0.0894129	1
310	Chr06:Chr16	0.593311	1
311	Chr06:Chr17	0.463696	1
312	Chr06:Chr20	0.377449	1
313	Chr06:Chr21	0.268949	1
314	Chr06:Chr23	0.161602	1
315	Chr06:Chr28	0.280963	1
316	Chr07:Chr08	0.295268	1
317	Chr07:Chr11	0.0597106	1
318	Chr07:Chr12	0.574793	1
319	Chr07:Chr13	0.0682002	1
320	Chr07:Chr16	0.405136	1
321	Chr07:Chr17	0.182087	1
322	Chr07:Chr21	0.0478955	1
323	Chr07:Chr23	0.0668479	1
324	Chr07:Chr24	0.385854	1
325	Chr07:Chr28	0.504471	1
326	Chr08:Chr11	0.372963	1
327	Chr08:Chr13	0.207251	1
328	Chr08:Chr16	0.60066	1
329	Chr08:Chr17	0.531372	1
330	Chr08:Chr20	0.415981	1
331	Chr08:Chr21	0.421369	1
332	Chr08:Chr23	0.213785	1
333	Chr08:Chr28	0.272023	1
334	Chr09:Chr10	0.0147224	1
335	Chr09:Chr12	0.0541953	1
336	Chr09:Chr16	0.148918	1
337	Chr09:Chr17	0.545169	1
338	Chr09:Chr18	0.157382	1
339	Chr09:Chr24	0.29586	1
340	Chr10:Chr12	0.0695273	1
341	Chr10:Chr16	0.371579	1
342	Chr10:Chr17	0.50988	1
343	Chr10:Chr18	0.343993	1
344	Chr10:Chr21	0.370266	1
345	Chr10:Chr24	0.018871	1
346	Chr11:Chr13	0.164183	1
347	Chr11:Chr16	0.433416	1
348	Chr11:Chr17	0.159284	1
349	Chr11:Chr21	0.211965	1
350	Chr11:Chr23	0.123733	1
351	Chr11:Chr24	0.380229	1
352	Chr12:Chr16	0.22353	1
353	Chr12:Chr17	0.451707	1
354	Chr12:Chr18	0.233136	1
355	Chr12:Chr24	0.269692	1
356	Chr13:Chr16	0.429122	1
357	Chr13:Chr17	0.311202	1
358	Chr13:Chr20	0.55567	1
359	Chr13:Chr21	0.208305	1
360	Chr13:Chr23	0.00427197	1
361	Chr13:Chr28	0.431321	1
362	Chr16:Chr17	0.182122	1
363	Chr16:Chr18	0.437835	1
364	Chr16:Chr21	0.504834	1
365	Chr16:Chr23	0.398103	1
366	Chr16:Chr24	0.000472323	1
367	Chr17:Chr21	0.217981	1
368	Chr17:Chr23	0.310099	1
369	Chr17:Chr24	0.261166	1
370	Chr18:Chr24	0.511419	1
371	Chr18:Chr26	0.522212	1
372	Chr20:Chr21	0.504493	1
373	Chr20:Chr28	0.0123346	1
374	Chr21:Chr23	0.0895503	1
375	Chr21:Chr24	0.244757	1
376	Chr21:Chr28	0.517076	1
377	Chr23:Chr24	0.590031	1
378	Chr23:Chr28	0.487153	1
