# Supplementary material for: Prophage-encoded Hm-oscar gene recapitulates Wolbachia-induced male-killing in the tea tortrix moth Homona magnanima
Source: eLife. 2025 Apr 14;13:RP101101. doi: 10.7554/eLife.101101 (PMC11996169; doi:10.7554/eLife.101101)
Supplement: Figure 3—source data 3. [file elife-101101-fig3-data3.xlsx]

## Sheet: Sheet1
Fig.3b
chromosome	Log2[GFPM-GFPF]
Chr01	-0.00456385
Chr01	-0.61343
Chr01	-0.0145733
Chr01	-0.344078
Chr01	0.410923
Chr01	0.0335614
Chr01	-0.196876
Chr01	-0.129673
Chr01	-0.649095
Chr01	-0.0724122
Chr01	-0.169583
Chr01	-0.0943541
Chr01	0.579973
Chr01	0.236593
Chr01	0.398714
Chr01	-0.445574
Chr01	-0.258727
Chr01	-0.127068
Chr01	2.52986
Chr01	0.0105862
Chr01	0.235372
Chr01	-0.0192429
Chr01	-0.143724
Chr01	0.17191
Chr01	0.633953
Chr01	0.328543
Chr01	0.367733
Chr01	0.307073
Chr01	-0.367114
Chr01	-0.367114
Chr01	1.47036
Chr01	1.47036
Chr01	-0.079167
Chr01	-0.235595
Chr01	0.763251
Chr01	-0.351236
Chr01	-0.0753841
Chr01	0.0489581
Chr01	0.0429775
Chr01	-0.290937
Chr01	1.05661
Chr01	-0.652889
Chr01	0.32281
Chr01	0.294491
Chr01	-1.47893
Chr01	0.181214
Chr01	-0.316621
Chr01	-0.341434
Chr01	-0.226224
Chr01	0.0198077
Chr01	-0.115361
Chr01	0.276626
Chr01	-0.467756
Chr01	8.72906
Chr01	8.72906
Chr01	0.0538028
Chr01	-0.312662
Chr01	-0.0672098
Chr01	-0.0704625
Chr01	-0.270416
Chr01	0.0563543
Chr01	1.17922
Chr01	0.38131
Chr01	0.38131
Chr01	-0.701625
Chr01	-0.701625
Chr01	-0.97771
Chr01	-0.97771
Chr01	-0.376266
Chr01	-0.211123
Chr01	-0.211123
Chr01	-0.795021
Chr01	0.123874
Chr01	-0.0867314
Chr01	-0.0755768
Chr01	0.373373
Chr01	0.289982
Chr01	0.000538479
Chr01	0.441121
Chr01	-0.0301348
Chr01	0.186309
Chr01	-0.191876
Chr01	0.382307
Chr01	-0.338501
Chr01	-0.635846
Chr01	-0.204848
Chr01	-0.204848
Chr01	0.00179095
Chr01	-0.299453
Chr01	-0.299453
Chr01	0.310892
Chr01	0.448975
Chr01	0.09542
Chr01	0.34482
Chr01	-1.10111
Chr01	-0.603257
Chr01	-1.61213
Chr01	0.695166
Chr01	-0.354487
Chr01	0.248381
Chr01	0.265428
Chr01	-0.517002
Chr01	-0.0943465
Chr01	-0.132002
Chr01	0.231147
Chr01	-0.29972
Chr01	0.106465
Chr01	-0.379703
Chr01	0.0719363
Chr01	5.50807
Chr01	-0.821615
Chr01	-2.16895
Chr01	-0.621926
Chr01	0.0235784
Chr01	0.133211
Chr01	-0.125491
Chr01	-0.237275
Chr01	0.508544
Chr01	0.496152
Chr01	-0.196425
Chr01	-0.438281
Chr01	-0.8247
Chr01	-0.0739189
Chr01	-0.269972
Chr01	-0.0995208
Chr01	-0.329819
Chr01	-0.704947
Chr01	0.275389
Chr01	-0.607759
Chr01	-0.642057
Chr01	-0.413727
Chr01	0.0227828
Chr01	0.124761
Chr01	-0.786895
Chr01	0.356703
Chr01	0.734699
Chr01	1.23993
Chr01	0.527614
Chr01	0.591864
Chr01	0.0152089
Chr01	0.0152089
Chr01	-0.219264
Chr01	0.0212042
Chr01	-0.345167
Chr01	0.303166
Chr01	0.15595
Chr01	0.367253
Chr01	-0.111946
Chr01	-0.633157
Chr01	-0.442726
Chr01	-0.442726
Chr01	0.0256554
Chr01	0.147491
Chr01	0.147491
Chr01	-0.961247
Chr01	0.25719
Chr01	-0.00422502
Chr01	-0.00422502
Chr01	-0.157961
Chr01	1.15224
Chr01	-0.508131
Chr01	-1.18723
Chr01	-0.567005
Chr01	-0.720558
Chr01	1.00146
Chr01	-0.115165
Chr01	-0.115165
Chr01	-14.0758
Chr01	-0.0287431
Chr01	-0.180328
Chr01	0.604933
Chr01	-0.202254
Chr01	-0.386977
Chr01	-0.119678
Chr01	-0.179666
Chr01	0.281185
Chr01	0.621809
Chr01	-0.967289
Chr01	0.187726
Chr01	0.0641321
Chr01	0.136096
Chr01	0.0689304
Chr01	0.0587941
Chr01	0.205606
Chr01	0.213679
Chr01	0.198321
Chr01	0.0590688
Chr01	-0.0336356
Chr01	0.908505
Chr01	0.041284
Chr01	-0.179284
Chr01	-0.165407
Chr01	-0.123227
Chr01	0.10664
Chr01	-0.499322
Chr01	-0.370882
Chr01	-16.605
Chr01	1.02344
Chr01	-0.511373
Chr01	0.167229
Chr01	0.167229
Chr01	-0.477621
Chr01	0.0106427
Chr01	0.0106427
Chr01	0.205204
Chr01	-0.247601
Chr01	0.244948
Chr01	0.244948
Chr01	0.061248
Chr01	-0.283375
Chr01	-0.264483
Chr01	0.0127607
Chr01	0.0646849
Chr01	-0.247315
Chr01	-0.569863
Chr01	-0.304343
Chr01	-0.339125
Chr01	-0.227755
Chr01	-0.224165
Chr01	0.196003
Chr01	0.0918381
Chr01	0.0918381
Chr01	0.189825
Chr01	-0.55796
Chr01	-0.55796
Chr01	-0.0864634
Chr01	-0.0864634
Chr01	-0.901579
Chr01	0.165333
Chr01	5.32771
Chr01	-0.0668088
Chr01	-0.544096
Chr01	-1.06007
Chr01	0.814218
Chr01	0.117977
Chr01	-0.480519
Chr01	0.479991
Chr01	0.479991
Chr01	-0.224842
Chr01	-4.23762
Chr01	1.36518
Chr01	0.239998
Chr01	-0.0725465
Chr01	0.0983823
Chr01	-0.305017
Chr01	-0.0974883
Chr01	0.287028
Chr01	-0.961633
Chr01	-0.749469
Chr01	0.00110332
Chr01	-0.035197
Chr01	0.289062
Chr01	0.061304
Chr01	-0.673038
Chr01	-1.45061
Chr01	0.866805
Chr01	-0.105025
Chr01	0.0273378
Chr01	0.0273378
Chr01	0.550628
Chr01	0.0251708
Chr01	0.337416
Chr01	0.304945
Chr01	0.0762095
Chr01	0.00313088
Chr01	0.13753
Chr01	-0.932633
Chr01	-0.354963
Chr01	-0.354963
Chr01	0.0398258
Chr01	0.474249
Chr01	0.474249
Chr01	0.733076
Chr01	-0.194294
Chr01	-0.31795
Chr01	-0.24024
Chr01	0.562682
Chr01	-0.120856
Chr01	0.766824
Chr01	0.0456514
Chr01	0.0456514
Chr01	-0.589471
Chr01	-0.356044
Chr01	-0.264377
Chr01	-0.26051
Chr01	-14.0675
Chr01	-0.31907
Chr01	-0.367572
Chr01	-0.367572
Chr01	0.01826
Chr01	0.760836
Chr01	-0.896687
Chr01	1.14068
Chr01	1.95145
Chr01	-0.245006
Chr01	-0.175756
Chr01	-0.420571
Chr01	-0.197989
Chr01	-0.0342389
Chr01	-0.681081
Chr01	-0.150233
Chr01	-0.0193364
Chr01	-0.557255
Chr01	-0.549518
Chr01	-0.0752287
Chr01	-0.415204
Chr01	-0.30259
Chr01	-0.496415
Chr01	0.348671
Chr01	0.0973014
Chr01	-0.225903
Chr01	-0.242301
Chr01	-0.108851
Chr01	0.0904537
Chr01	-1.37191
Chr01	-1.37191
Chr01	-0.076433
Chr01	-0.207397
Chr01	-0.522403
Chr01	-0.0756672
Chr01	0.0509888
Chr01	-0.333202
Chr01	-0.536115
Chr01	-0.736017
Chr01	-0.337063
Chr01	0.114685
Chr01	-0.352134
Chr01	0.516058
Chr01	0.0876735
Chr01	-0.333266
Chr01	0.274826
Chr01	-0.46213
Chr01	0.442844
Chr01	0.863411
Chr01	1.25404
Chr01	1.25404
Chr01	1.4057
Chr01	1.4057
Chr01	1.4057
Chr01	0.0294452
Chr01	-0.111861
Chr01	0.0301372
Chr01	-0.220809
Chr01	-0.287881
Chr01	0.774528
Chr01	0.586715
Chr01	-0.0106113
Chr01	-0.239927
Chr01	0.102149
Chr01	0.0281542
Chr01	0.0855277
Chr01	0.148021
Chr01	0.514864
Chr01	-0.325755
Chr01	0.0664968
Chr01	0.00468716
Chr01	0.0290976
Chr01	0.264113
Chr01	0.373858
Chr01	0.0214752
Chr01	0.784159
Chr01	-0.131798
Chr01	0.715967
Chr01	-0.220637
Chr01	-4.53312
Chr01	-0.134402
Chr01	-0.0104547
Chr01	0.686258
Chr01	0.165004
Chr01	-0.0170107
Chr01	0.0489592
Chr01	0.0578472
Chr01	-0.197054
Chr01	-0.228041
Chr01	8.56345
Chr01	0.344376
Chr01	0.33223
Chr01	0.385602
Chr01	0.660885
Chr01	-0.39199
Chr01	-0.129784
Chr01	-0.321352
Chr01	1.32684
Chr01	-0.203598
Chr01	0.313528
Chr01	-0.111914
Chr01	-0.111914
Chr01	0.0376001
Chr01	0.0376001
Chr01	-0.383431
Chr01	-0.383431
Chr01	-0.516009
Chr01	0.130096
Chr01	-0.602678
Chr01	0.0725944
Chr01	0.0725944
Chr01	0.233782
Chr01	-0.0766357
Chr01	-0.950941
Chr01	-0.250802
Chr01	-0.171695
Chr01	-0.217989
Chr01	-0.459243
Chr01	-0.402222
Chr01	-0.511552
Chr01	0.006618
Chr01	-0.143302
Chr01	0.0688026
Chr01	-0.000901737
Chr01	1.37599
Chr01	0.47646
Chr01	-0.261439
Chr01	-0.749285
Chr01	11.12
Chr01	11.12
Chr01	0.451095
Chr01	-1.25376
Chr01	0.899528
Chr01	-0.112592
Chr01	-0.218172
Chr01	-0.120339
Chr01	0.187393
Chr01	0.118182
Chr01	-1.78245
Chr01	-0.0725568
Chr01	-0.261492
Chr01	-1.54416
Chr01	-0.0652652
Chr01	-0.651593
Chr01	-0.374343
Chr01	5.7191
Chr01	-0.0444246
Chr01	-0.427047
Chr01	0.348133
Chr01	-0.400696
Chr01	-0.548695
Chr01	-1.29526
Chr01	1.50917
Chr01	-0.0922792
Chr01	0.0813251
Chr01	-0.257549
Chr01	-0.182184
Chr01	-0.208078
Chr01	-0.182312
Chr01	0.351846
Chr01	-0.126187
Chr01	-0.405009
Chr01	-0.0285441
Chr01	-0.365172
Chr01	-0.952793
Chr01	-0.166376
Chr01	-0.154366
Chr01	1.1267
Chr01	-0.728753
Chr01	-0.222788
Chr01	-0.383698
Chr01	-0.645296
Chr01	-0.0199049
Chr01	-0.478194
Chr01	0.66077
Chr01	-0.206014
Chr01	0.165384
Chr01	0.153994
Chr01	0.153994
Chr01	0.00533862
Chr01	-13.5594
Chr01	3.28809
Chr01	-2.00966
Chr01	0.248459
Chr01	0.248459
Chr01	0.730263
Chr01	-0.0500992
Chr01	-0.441658
Chr01	-0.441658
Chr01	-0.697245
Chr01	-0.275256
Chr01	-1.69559
Chr01	0.140112
Chr01	-0.674683
Chr01	-3.63431
Chr01	-0.257113
Chr01	0.938034
Chr01	-6.91149
Chr01	0.80394
Chr01	-0.017393
Chr01	-0.143574
Chr01	-0.133602
Chr01	-0.977306
Chr01	0.400738
Chr01	-0.358355
Chr01	-0.113648
Chr01	-0.249978
Chr01	0.134274
Chr01	0.198504
Chr01	-0.357768
Chr01	0.380898
Chr01	-0.100979
Chr01	0.182128
Chr01	-1.08332
Chr01	0.188279
Chr01	0.188279
Chr01	-0.22153
Chr01	0.254696
Chr01	1.11939
Chr01	-0.221945
Chr01	-1.847
Chr01	0.51881
Chr01	-0.433074
Chr01	-0.0926355
Chr01	0.0968426
Chr01	-0.0604114
Chr01	-0.0604114
Chr01	-0.0435684
Chr01	0.0709847
Chr01	0.342624
Chr01	-0.294647
Chr01	0.658678
Chr01	0.173865
Chr01	-2.39731
Chr01	-0.243135
Chr01	-2.79156
Chr01	-0.102441
Chr01	0.231423
Chr01	0.231423
Chr01	-0.509164
Chr01	-0.509164
Chr01	10.3668
Chr01	10.3668
Chr01	0.40572
Chr01	0.40572
Chr01	0.118211
Chr01	0.118211
Chr01	0.409749
Chr01	0.409749
Chr01	0.00142582
Chr01	-0.269216
Chr01	0.613718
Chr01	-0.393069
Chr01	0.154577
Chr01	0.154577
Chr01	0.154577
Chr01	-0.157415
Chr01	-1.46333
Chr01	-0.107087
Chr01	-0.107087
Chr01	-0.107087
Chr01	-0.107087
Chr01	-0.107087
Chr01	-0.107087
Chr01	-0.107087
Chr01	-0.107087
Chr01	-0.107087
Chr01	-0.107087
Chr01	-0.107087
Chr01	-0.107087
Chr01	1.14839
Chr01	-0.367945
Chr01	-0.367945
Chr01	-0.367945
Chr01	-0.367945
Chr01	-0.367945
Chr01	-0.367945
Chr01	-0.367945
Chr01	-0.367945
Chr01	-0.367945
Chr01	-0.367945
Chr01	-0.367945
Chr01	-0.367945
Chr01	0.428202
Chr01	-0.278426
Chr01	-0.278426
Chr01	-0.278426
Chr01	-0.278426
Chr01	-0.278426
Chr01	-0.278426
Chr01	-1.81285
Chr01	-0.277861
Chr01	-0.187721
Chr01	-0.271739
Chr01	-0.289455
Chr01	-0.0586372
Chr01	-0.106808
Chr01	0.0195466
Chr01	0.0195466
Chr01	0.106497
Chr01	0.309646
Chr01	0.309646
Chr01	0.309646
Chr01	0.309646
Chr01	0.309646
Chr01	0.569109
Chr01	-8.09583
Chr01	-0.220823
Chr01	-0.220823
Chr01	-0.220823
Chr01	-0.220823
Chr01	-0.139461
Chr01	-0.0421173
Chr01	13.5738
Chr01	0.159607
Chr01	-0.407065
Chr01	0.327073
Chr01	0.327073
Chr01	0.476786
Chr01	-0.20957
Chr01	-0.105739
Chr01	-0.983682
Chr01	-0.194704
Chr01	-0.194704
Chr01	-0.28882
Chr01	-1.21049
Chr01	-4.25261
Chr01	0.243012
Chr01	0.0217417
Chr01	0.0267453
Chr01	4.0563
Chr01	0.164979
Chr01	3.96812
Chr01	0.655353
Chr01	-0.158551
Chr01	0.0838552
Chr01	0.777952
Chr01	1.39797
Chr01	1.39797
Chr01	0.224456
Chr01	-0.656468
Chr01	0.0451777
Chr01	-0.146213
Chr01	0.570484
Chr01	-0.170469
Chr01	-0.328772
Chr01	0.0483852
Chr01	0.526777
Chr01	-0.301338
Chr01	0.19625
Chr01	-0.248335
Chr01	-0.530158
Chr02	-0.305157
Chr02	-0.35644
Chr02	-0.200212
Chr02	0.0145682
Chr02	0.0693911
Chr02	-0.711288
Chr02	0.0825223
Chr02	0.136125
Chr02	-0.501351
Chr02	-0.705014
Chr02	-0.705014
Chr02	-0.705014
Chr02	-0.705014
Chr02	-0.705014
Chr02	-0.705014
Chr02	-0.705014
Chr02	-1.10066
Chr02	-1.10066
Chr02	-1.10066
Chr02	-1.10066
Chr02	-1.10066
Chr02	-1.10066
Chr02	-1.10066
Chr02	-1.22882
Chr02	-1.38313
Chr02	-1.38313
Chr02	-1.38313
Chr02	-1.38313
Chr02	-0.0408077
Chr02	-0.0513053
Chr02	-0.838801
Chr02	-0.590239
Chr02	0.231465
Chr02	-0.0450756
Chr02	-10.6816
Chr02	0.332664
Chr02	-0.239677
Chr02	0.400397
Chr02	0.281999
Chr02	0.451955
Chr02	-0.188103
Chr02	-0.264931
Chr02	-0.642175
Chr02	-0.875977
Chr02	0.000644794
Chr02	-0.188399
Chr02	1.21758
Chr02	0.404547
Chr02	-0.152096
Chr02	-0.152096
Chr02	-0.252278
Chr02	-0.530206
Chr02	0.162172
Chr02	-0.486113
Chr02	-0.0162503
Chr02	0.426365
Chr02	0.426365
Chr02	-1.52764
Chr02	-0.188304
Chr02	-1.03089
Chr02	-0.488557
Chr02	-0.284262
Chr02	-0.518666
Chr02	0.1012
Chr02	-0.0205073
Chr02	-0.368792
Chr02	0.191716
Chr02	-0.181572
Chr02	-0.181572
Chr02	-0.248744
Chr02	0.0438759
Chr02	0.117586
Chr02	-0.233668
Chr02	-0.2207
Chr02	-0.512803
Chr02	0.246045
Chr02	-0.267815
Chr02	-0.615327
Chr02	-1.53027
Chr02	-0.471756
Chr02	-0.133349
Chr02	-0.0932001
Chr02	0.0448639
Chr02	-0.112219
Chr02	-1.17555
Chr02	-0.358566
Chr02	-0.798563
Chr02	0.0667269
Chr02	-0.365447
Chr02	-0.433153
Chr02	-0.0216673
Chr02	0.326514
Chr02	-0.174989
Chr02	0.0079016
Chr02	-0.0785416
Chr02	1.07145
Chr02	0.645082
Chr02	0.225441
Chr02	0.588926
Chr02	0.786549
Chr02	-0.160741
Chr02	0.36113
Chr02	0.2012
Chr02	-0.0100608
Chr02	-0.494766
Chr02	-0.0124226
Chr02	-0.437435
Chr02	-0.474161
Chr02	-0.208096
Chr02	-0.353697
Chr02	0.0192517
Chr02	-1.13091
Chr02	-0.4104
Chr02	-0.0720217
Chr02	-0.489656
Chr02	-0.301619
Chr02	0.175426
Chr02	-0.305264
Chr02	0.141737
Chr02	-0.416503
Chr02	-0.685291
Chr02	-0.325006
Chr02	0.153464
Chr02	0.0254325
Chr02	-0.231253
Chr02	-0.231253
Chr02	0.0334952
Chr02	0.442852
Chr02	0.174398
Chr02	0.120451
Chr02	0.0838264
Chr02	0.01857
Chr02	0.0253972
Chr02	-0.311521
Chr02	-0.368548
Chr02	-0.0688196
Chr02	-0.155656
Chr02	-1.11108
Chr02	-0.619721
Chr02	-0.983427
Chr02	-0.777823
Chr02	-0.116661
Chr02	0.344124
Chr02	-0.337248
Chr02	0.0916891
Chr02	0.218
Chr02	-1.45517
Chr02	-0.182423
Chr02	0.247528
Chr02	-0.909314
Chr02	-0.144261
Chr02	-0.738916
Chr02	0.198522
Chr02	-1.29907
Chr02	0.049059
Chr02	-0.104603
Chr02	-0.0480186
Chr02	-0.000740096
Chr02	0.984473
Chr02	-1.29772
Chr02	0.195095
Chr02	0.195095
Chr02	-0.0369399
Chr02	-0.0490504
Chr02	-0.744411
Chr02	-0.267618
Chr02	-0.814562
Chr02	-0.325035
Chr02	-0.0932439
Chr02	-0.107422
Chr02	-0.253555
Chr02	-0.346895
Chr02	-0.310281
Chr02	-0.405537
Chr02	-0.582717
Chr02	0.39876
Chr02	-0.451887
Chr02	0.0857925
Chr02	-0.649088
Chr02	-0.150489
Chr02	-0.0137216
Chr02	0.0774521
Chr02	0.0457892
Chr02	0.0457892
Chr02	-8.7584
Chr02	-8.7584
Chr02	-0.147559
Chr02	-0.147559
Chr02	-0.493497
Chr02	-0.0405639
Chr02	-0.291427
Chr02	-0.0441313
Chr02	-0.0441313
Chr02	-0.0441313
Chr02	-0.346554
Chr02	-0.346554
Chr02	0.130468
Chr02	0.0754552
Chr02	0.838877
Chr02	-0.115473
Chr02	-0.468816
Chr02	-0.261485
Chr02	-0.200215
Chr02	-0.0253632
Chr02	-0.336361
Chr02	-0.208305
Chr03	-0.172756
Chr03	0.025094
Chr03	-0.501862
Chr03	-0.443554
Chr03	-0.422946
Chr03	0.221149
Chr03	0.0532398
Chr03	-0.269796
Chr03	-1.13881
Chr03	-1.57987
Chr03	-0.397869
Chr03	-0.397869
Chr03	-0.0394059
Chr03	-0.0394059
Chr03	-0.127248
Chr03	0.0954275
Chr03	-0.0275719
Chr03	0.0252941
Chr03	-0.69169
Chr03	-0.216911
Chr03	-0.0590287
Chr03	-0.198156
Chr03	-0.00897111
Chr03	-0.0527767
Chr03	-0.214485
Chr03	-0.51307
Chr03	-0.434596
Chr03	-0.782443
Chr03	-0.119741
Chr03	0.158343
Chr03	-0.340355
Chr03	-0.620575
Chr03	0.99007
Chr03	-0.126584
Chr03	-0.431683
Chr03	-0.100946
Chr03	-0.226716
Chr03	0.154446
Chr03	0.060981
Chr03	-0.446044
Chr03	-0.792221
Chr03	-0.280263
Chr03	-0.174189
Chr03	-1.36092
Chr03	-0.325578
Chr03	-0.40225
Chr03	0.849107
Chr03	-0.547329
Chr03	-0.361217
Chr03	-0.0804702
Chr03	0.668655
Chr03	0.189634
Chr03	0.438411
Chr03	-0.465782
Chr03	0.987328
Chr03	0.420644
Chr03	-0.159452
Chr03	-1.01261
Chr03	-1.01261
Chr03	0.00794293
Chr03	0.0141031
Chr03	-0.646409
Chr03	-0.412301
Chr03	0.268968
Chr03	-0.0850858
Chr03	0.413069
Chr03	-0.0899154
Chr03	0.567177
Chr03	0.161739
Chr03	0.184475
Chr03	0.0346474
Chr03	-0.194152
Chr03	0.750974
Chr03	-0.0858416
Chr03	-0.0858416
Chr03	0.281574
Chr03	-0.181256
Chr03	-0.0296641
Chr03	-0.230938
Chr03	-0.472102
Chr03	-0.0458235
Chr03	-0.0710738
Chr03	-0.0710738
Chr03	-0.898444
Chr03	-0.616351
Chr03	0.314513
Chr03	-0.315107
Chr03	-0.508165
Chr03	0.0584282
Chr03	0.712335
Chr03	-0.0980473
Chr03	0.0684697
Chr03	0.321096
Chr03	0.282121
Chr03	-0.085126
Chr03	-0.024448
Chr03	0.146999
Chr03	-0.0660971
Chr03	-0.0632193
Chr03	-0.149716
Chr03	-0.154756
Chr03	-0.504935
Chr03	-0.188957
Chr03	-0.100046
Chr03	0.0875695
Chr03	-0.293611
Chr03	0.0429603
Chr03	0.0329186
Chr03	0.180984
Chr03	-0.705391
Chr03	-0.514587
Chr03	0.191346
Chr03	0.324246
Chr03	1.44698
Chr03	-0.533312
Chr03	-0.712594
Chr03	0.205156
Chr03	0.0774954
Chr03	-0.0704716
Chr03	-0.375477
Chr03	-0.631178
Chr03	0.18089
Chr03	-0.480072
Chr03	-2.00195
Chr03	0.18297
Chr03	2.65021
Chr03	-0.0128272
Chr03	-0.118675
Chr03	-0.0977499
Chr03	-0.548324
Chr03	-0.83914
Chr03	-1.82069
Chr03	-1.594
Chr03	-0.281729
Chr03	0.178389
Chr03	-0.476691
Chr03	-0.139101
Chr03	0.546314
Chr03	-0.10587
Chr03	-0.347322
Chr03	-0.174137
Chr03	0.316376
Chr03	-0.143734
Chr03	-1.14037
Chr03	-1.09613
Chr03	-0.633412
Chr03	-0.316197
Chr03	-0.00213326
Chr03	-0.958516
Chr03	0.544154
Chr03	-0.124709
Chr03	0.0476891
Chr03	-0.639109
Chr03	0.0179878
Chr03	-0.225761
Chr03	-0.13446
Chr03	-0.347149
Chr03	-0.404629
Chr03	-0.35811
Chr03	-0.474259
Chr03	0.0665607
Chr03	-0.0878439
Chr03	-0.175207
Chr03	-0.20485
Chr03	-0.334121
Chr03	-0.155297
Chr03	-0.273849
Chr03	-0.486847
Chr03	-0.486847
Chr03	0.548331
Chr03	-0.250351
Chr03	0.070595
Chr03	-0.131012
Chr03	-0.898276
Chr03	-0.964522
Chr03	0.349805
Chr03	-0.0340712
Chr03	0.289521
Chr03	-0.152317
Chr03	0.290296
Chr03	0.00614067
Chr03	0.0927036
Chr03	0.688141
Chr03	0.359409
Chr03	0.00699712
Chr03	0.0111236
Chr03	-0.387383
Chr03	-0.616057
Chr03	-0.0844614
Chr03	-0.228121
Chr03	-3.12196
Chr03	4.78998
Chr03	0.0786195
Chr03	-0.0556933
Chr03	-0.198568
Chr03	-0.640038
Chr03	-0.197008
Chr03	-0.285902
Chr03	-0.0475083
Chr03	-0.313062
Chr03	0.225031
Chr03	-0.0036964
Chr03	-0.106985
Chr03	-0.18436
Chr03	-0.0927596
Chr03	-0.0701032
Chr03	-0.158967
Chr03	-0.0962217
Chr03	-0.142621
Chr03	-0.442655
Chr03	-0.48944
Chr03	-0.125725
Chr03	0.395217
Chr03	0.395217
Chr03	-0.0268318
Chr03	-0.323413
Chr03	0.0990704
Chr03	0.129934
Chr03	-0.308575
Chr03	-0.0574293
Chr03	0.117235
Chr03	-0.344791
Chr03	-0.510593
Chr03	-0.286225
Chr03	0.193884
Chr03	-0.0275907
Chr03	-0.128503
Chr03	-0.311903
Chr03	-0.11248
Chr03	-0.11248
Chr03	0.301728
Chr03	-0.38379
Chr03	-0.253033
Chr03	1.45135
Chr03	0.10971
Chr03	-0.0686263
Chr03	-0.112107
Chr03	0.0519374
Chr03	0.0519374
Chr03	-0.0693323
Chr03	0.0986186
Chr03	0.0986186
Chr03	-0.206152
Chr03	-0.206152
Chr03	-0.00872883
Chr03	-0.305192
Chr03	-0.322957
Chr03	-0.617348
Chr03	-0.244911
Chr03	0.353197
Chr03	-0.444721
Chr03	-0.204351
Chr03	-0.0961772
Chr03	0.0157332
Chr03	-0.0575065
Chr03	0.591885
Chr03	0.628695
Chr03	0.312529
Chr03	0.0427179
Chr03	-0.514834
Chr03	-0.514834
Chr03	-0.100863
Chr03	-0.211984
Chr03	-0.454222
Chr03	-0.263937
Chr03	1.01312
Chr03	-5.15371
Chr03	0.225449
Chr03	-0.729728
Chr03	-0.740093
Chr03	2.37053
Chr03	0.208007
Chr03	-5.04389
Chr03	13.3754
Chr03	0.392026
Chr03	-0.0697142
Chr03	-15.9537
Chr03	-0.0565246
Chr03	-0.0721078
Chr03	-0.0721078
Chr03	-0.0721078
Chr03	-0.0721078
Chr03	-0.272612
Chr03	-0.438686
Chr03	-0.438686
Chr03	-0.787093
Chr03	0.272416
Chr03	-0.175556
Chr03	0.0718949
Chr03	0.0525603
Chr03	-0.456196
Chr03	-1.55763
Chr03	-1.55763
Chr03	0.403787
Chr03	-3.0016
Chr03	0.0751211
Chr03	-3.5302
Chr03	-0.23815
Chr03	0.430519
Chr03	-0.778105
Chr03	-0.496571
Chr03	0.510779
Chr03	-0.823679
Chr03	1.27297
Chr03	-0.415149
Chr03	0.37966
Chr03	-1.36539
Chr03	0.618039
Chr03	-0.618543
Chr03	-0.484671
Chr03	-0.938194
Chr03	-0.966119
Chr03	-0.126389
Chr03	0.118764
Chr03	0.0456549
Chr03	0.772253
Chr03	-0.233064
Chr03	-0.431556
Chr03	-0.547715
Chr03	0.181914
Chr03	-0.257763
Chr03	-0.00843875
Chr03	0.616979
Chr03	-0.573327
Chr03	-0.581166
Chr03	0.0201015
Chr03	-0.11232
Chr03	-0.247826
Chr03	-0.526072
Chr03	-0.86369
Chr03	0.140908
Chr03	0.176338
Chr03	0.0266739
Chr03	-0.341818
Chr03	-0.0856143
Chr03	-0.0906626
Chr03	0.311399
Chr03	0.199105
Chr03	-0.0371214
Chr03	0.167615
Chr03	-0.105766
Chr03	0.111517
Chr03	-0.189
Chr03	-0.217586
Chr03	0.145339
Chr03	0.229225
Chr03	-0.189182
Chr03	0.570237
Chr03	-0.247091
Chr03	-0.296679
Chr03	0.360987
Chr03	-0.00770919
Chr03	-1.59497
Chr03	-0.482315
Chr03	-0.162555
Chr03	-0.126213
Chr03	-0.165561
Chr03	-0.673073
Chr03	-0.23028
Chr03	-0.380327
Chr03	-0.640767
Chr03	-0.313999
Chr03	-0.215577
Chr03	0.0910281
Chr03	0.222475
Chr03	-0.234336
Chr03	-0.0874929
Chr03	-0.0874929
Chr03	-0.421564
Chr03	-0.169078
Chr03	0.44838
Chr03	-1.78151
Chr03	-0.10108
Chr03	0.116843
Chr03	-0.152643
Chr03	-0.175599
Chr03	1.53579
Chr03	0.499053
Chr03	0.00391779
Chr03	-0.237646
Chr03	-0.199388
Chr03	0.00903002
Chr03	-0.476506
Chr03	-0.0574647
Chr03	-0.442852
Chr03	-0.0736909
Chr03	0.085385
Chr03	-0.0173353
Chr03	-0.72812
Chr03	0.157102
Chr03	-0.644244
Chr03	-0.121908
Chr03	-0.130952
Chr03	1.19483
Chr03	0.252337
Chr03	0.41762
Chr03	0.41762
Chr03	-0.323411
Chr03	-0.284792
Chr03	0.48501
Chr03	-0.414739
Chr03	-0.23721
Chr03	0.000583999
Chr03	0.0410625
Chr03	-0.144337
Chr03	-0.42834
Chr03	-0.0383157
Chr03	-0.052361
Chr03	-0.28058
Chr03	0.332511
Chr03	0.107875
Chr03	-0.279631
Chr03	-0.249091
Chr03	0.194295
Chr03	-0.0862374
Chr03	-0.249568
Chr03	-0.0557459
Chr03	-0.326092
Chr03	0.0196361
Chr03	-0.148482
Chr03	-0.0582055
Chr03	0.0835798
Chr03	-0.0884706
Chr03	-0.118191
Chr03	-12.2103
Chr03	-0.152654
Chr03	-0.378955
Chr03	-0.0721406
Chr03	-0.173224
Chr03	0.283629
Chr03	0.0462053
Chr03	0.0664965
Chr03	-0.294489
Chr03	-0.0786656
Chr03	-3.50609
Chr03	2.07048
Chr03	-0.299188
Chr03	-0.345901
Chr03	-0.111496
Chr03	-0.534836
Chr03	-0.407856
Chr03	-0.267513
Chr03	-0.0104269
Chr03	-0.0261621
Chr03	-0.16341
Chr03	-0.52054
Chr03	-0.2589
Chr03	-0.0884724
Chr03	0.0838506
Chr03	-0.0144534
Chr03	-0.437957
Chr03	-0.261395
Chr03	-0.371383
Chr03	-0.250329
Chr03	-0.23319
Chr03	-0.0532007
Chr03	0.183219
Chr03	-0.23538
Chr03	0.125777
Chr03	-0.211071
Chr03	-0.13676
Chr03	-0.0417484
Chr03	-2.12564
Chr03	-2.12564
Chr03	-2.12564
Chr03	-2.12564
Chr03	0.428311
Chr03	0.428311
Chr03	0.428311
Chr03	0.428311
Chr03	0.546355
Chr03	0.546355
Chr03	0.546355
Chr03	0.546355
Chr03	-0.327469
Chr03	-0.327469
Chr03	-0.327469
Chr03	-0.327469
Chr03	-0.327469
Chr03	-0.327469
Chr03	-0.327469
Chr03	-0.327469
Chr03	1.70731
Chr03	0.0223227
Chr03	-0.319568
Chr03	-0.440315
Chr03	1.85569
Chr03	0.620694
Chr03	-0.198226
Chr03	-0.805538
Chr03	-0.338074
Chr03	-0.52401
Chr03	0.00774949
Chr03	-0.404786
Chr03	-0.277763
Chr03	-0.244175
Chr03	-0.268354
Chr03	0.263609
Chr03	-0.0612549
Chr03	-0.0612549
Chr03	-0.507602
Chr03	0.0816983
Chr03	-1.39691
Chr03	-0.270759
Chr03	-0.0876869
Chr03	-0.0876869
Chr03	-0.0876869
Chr03	-0.0876869
Chr03	-0.221521
Chr03	-0.221521
Chr03	-0.221521
Chr03	-0.221521
Chr03	-0.547323
Chr03	-0.604975
Chr03	0.0610776
Chr03	0.46888
Chr03	-0.464895
Chr03	-0.102625
Chr03	0.382535
Chr03	-0.0714437
Chr03	0.628455
Chr03	-0.203296
Chr03	-0.371621
Chr03	-0.371621
Chr03	-10.3931
Chr03	-10.3931
Chr03	-0.0954267
Chr03	0.276978
Chr03	-0.467434
Chr03	-0.144564
Chr03	-0.609064
Chr03	0.036624
Chr03	0.000928703
Chr03	-0.727205
Chr03	-0.1306
Chr03	-0.11584
Chr03	-0.561086
Chr03	-0.0657491
Chr03	-0.15641
Chr04	-0.990987
Chr04	-0.0106497
Chr04	-0.367213
Chr04	-0.950021
Chr04	-0.420917
Chr04	0.246091
Chr04	-0.661296
Chr04	0.089943
Chr04	-0.116101
Chr04	-0.0710016
Chr04	0.0700615
Chr04	0.20118
Chr04	-0.0480395
Chr04	-0.0847633
Chr04	-1.20469
Chr04	0.461762
Chr04	-0.619959
Chr04	-0.103741
Chr04	0.824541
Chr04	0.986842
Chr04	-0.0140999
Chr04	-0.238779
Chr04	-0.0453482
Chr04	0.182714
Chr04	0.182714
Chr04	0.0345286
Chr04	0.0523718
Chr04	0.0419403
Chr04	-0.00780316
Chr04	0.111961
Chr04	0.634508
Chr04	-0.197586
Chr04	-0.359298
Chr04	0.32996
Chr04	0.193884
Chr04	0.391762
Chr04	0.452726
Chr04	-0.195112
Chr04	-0.161436
Chr04	-0.126585
Chr04	0.26022
Chr04	-0.010383
Chr04	-0.0638752
Chr04	-0.219434
Chr04	0.0247768
Chr04	0.262131
Chr04	-0.437306
Chr04	-0.313652
Chr04	-0.17322
Chr04	-0.455875
Chr04	0.194826
Chr04	0.0385745
Chr04	-0.264218
Chr04	-0.246376
Chr04	-0.278714
Chr04	-0.0647512
Chr04	-0.837277
Chr04	-0.482182
Chr04	-0.069305
Chr04	-0.345283
Chr04	-0.473309
Chr04	0.230993
Chr04	0.288464
Chr04	0.0336757
Chr04	0.652518
Chr04	-0.245335
Chr04	-0.110364
Chr04	-0.442637
Chr04	-0.618238
Chr04	-0.0321068
Chr04	-0.0974349
Chr04	-0.303797
Chr04	-0.112702
Chr04	-0.0112907
Chr04	0.0450819
Chr04	0.15384
Chr04	0.0166496
Chr04	-0.0651041
Chr04	-0.0248743
Chr04	-0.0890013
Chr04	0.0231289
Chr04	0.0231289
Chr04	-12.2365
Chr04	-12.2365
Chr04	-10.722
Chr04	-10.722
Chr04	0.770555
Chr04	0.0452349
Chr04	0.0452349
Chr04	-1.75696
Chr04	0.0495364
Chr04	-0.452639
Chr04	-0.229831
Chr04	0.727952
Chr04	0.727952
Chr04	-0.0378764
Chr04	-0.0914234
Chr04	0.176697
Chr04	-0.0207009
Chr04	0.406844
Chr04	0.0857079
Chr04	-0.0844703
Chr04	-0.0243998
Chr04	0.0140921
Chr04	-0.0398516
Chr04	-0.0828395
Chr04	0.0137623
Chr04	-0.187113
Chr04	-0.0797655
Chr04	-0.230755
Chr04	-0.551966
Chr04	-0.281156
Chr04	0.0274996
Chr04	-0.226479
Chr04	-0.199563
Chr04	0.23063
Chr04	0.235947
Chr04	0.235947
Chr04	0.235947
Chr04	-0.0995136
Chr04	0.194265
Chr04	-12.3968
Chr04	-0.227676
Chr04	-0.227676
Chr04	-0.0098059
Chr04	0.0678851
Chr04	0.00496174
Chr04	0.152105
Chr04	-0.261006
Chr04	-0.0768468
Chr04	0.727904
Chr04	0.0417664
Chr04	-0.0914708
Chr04	-0.0233469
Chr04	0.391618
Chr04	-0.210025
Chr04	-0.361909
Chr04	0.0547204
Chr04	-0.384133
Chr04	-0.125229
Chr04	-0.0011412
Chr04	-0.0186058
Chr04	-0.0882389
Chr04	-0.98417
Chr04	-0.98417
Chr04	-1.73416
Chr04	0.056614
Chr04	-0.0689264
Chr04	-0.316725
Chr04	-0.106276
Chr04	-0.222065
Chr04	-0.107641
Chr04	0.0382366
Chr04	-0.730978
Chr04	-0.774395
Chr04	-0.210624
Chr04	0.0447321
Chr04	-0.279327
Chr04	0.0424046
Chr04	-0.410543
Chr04	0.328948
Chr04	-0.0401398
Chr04	-0.100829
Chr04	0.143121
Chr04	-0.111454
Chr04	-0.111792
Chr04	0.020347
Chr04	-0.112294
Chr04	0.108884
Chr04	-0.0718842
Chr04	-0.704671
Chr04	-0.0308852
Chr04	-0.0141494
Chr04	-0.82904
Chr04	-0.418111
Chr04	-0.242182
Chr04	-0.119017
Chr04	-0.586937
Chr04	-0.0983682
Chr04	-0.0679478
Chr04	-0.0228094
Chr04	-0.0831019
Chr04	-0.445353
Chr04	-0.445353
Chr04	-0.287511
Chr04	0.396405
Chr04	-0.846852
Chr04	-0.846852
Chr04	0.130504
Chr04	0.130504
Chr04	-0.673333
Chr04	-0.673333
Chr04	-0.440177
Chr04	0.0579739
Chr04	0.0579739
Chr04	0.357674
Chr04	-0.106033
Chr04	0.391895
Chr04	0.263467
Chr04	-0.0467013
Chr04	-0.201063
Chr04	0.0501542
Chr04	0.863521
Chr04	0.288029
Chr04	-0.114376
Chr04	0.0471459
Chr04	0.0471459
Chr04	-0.123194
Chr04	-0.010442
Chr04	-0.179062
Chr04	0.291943
Chr04	0.196939
Chr04	-0.169661
Chr04	0.0303717
Chr04	0.0303717
Chr04	0.168921
Chr04	-0.206267
Chr04	-0.0479117
Chr04	-0.0542855
Chr04	0.116193
Chr04	0.0541661
Chr04	0.169078
Chr04	0.0194081
Chr04	0.0925808
Chr04	-0.129841
Chr04	0.0461706
Chr04	0.0461706
Chr04	0.0461706
Chr04	0.0461706
Chr04	-0.00511492
Chr04	-10.7511
Chr04	1.60057
Chr04	-0.116435
Chr04	-0.665371
Chr04	0.0828589
Chr04	-0.289733
Chr04	0.0520869
Chr04	-0.204344
Chr04	0.31147
Chr04	0.31147
Chr04	-0.501956
Chr04	0.0206402
Chr04	-0.0122258
Chr04	-0.767381
Chr04	0.102606
Chr04	0.167826
Chr04	-0.0701022
Chr04	-0.205521
Chr04	-0.767195
Chr04	-0.324187
Chr04	-0.311572
Chr04	0.0493311
Chr04	1.04958
Chr04	0.241613
Chr04	-0.478198
Chr04	-3.87359
Chr04	-0.037594
Chr04	-0.472209
Chr04	0.0436876
Chr04	-1.64313
Chr04	-0.263856
Chr04	-0.201674
Chr04	0.0976469
Chr04	-0.154651
Chr04	-0.0389317
Chr04	0.369555
Chr04	-0.55001
Chr04	0.551637
Chr04	-0.243851
Chr04	0.108589
Chr04	-0.210273
Chr04	-0.469565
Chr04	3.30904
Chr04	-0.169134
Chr04	-0.0729179
Chr04	-0.510646
Chr04	0.00721342
Chr04	-0.311178
Chr04	0.0917467
Chr04	1.44011
Chr04	-0.35725
Chr04	-0.153664
Chr04	0.0635499
Chr04	-0.456401
Chr04	0.468244
Chr04	0.468244
Chr04	0.0121785
Chr04	-0.407798
Chr04	0.348215
Chr04	0.0443375
Chr04	0.325004
Chr04	-0.334001
Chr04	-0.0906587
Chr04	-0.427541
Chr04	-0.412023
Chr04	-1.21554
Chr04	-0.0442344
Chr04	-0.061422
Chr04	-0.438558
Chr04	-0.398166
Chr04	-0.526228
Chr04	-0.254702
Chr04	0.090878
Chr04	-0.381123
Chr04	-0.477184
Chr04	-0.154271
Chr04	-0.0176325
Chr04	-0.190537
Chr04	-0.00999017
Chr04	-0.267117
Chr04	-0.0331748
Chr04	-2.78282
Chr04	-2.78282
Chr04	-0.0772382
Chr04	-0.736332
Chr04	0.0148603
Chr04	-1.15309
Chr04	-0.136999
Chr04	-0.153344
Chr04	-0.142039
Chr04	-0.390388
Chr04	-0.390388
Chr04	-0.715244
Chr04	-0.0805416
Chr04	0.193693
Chr04	0.0293531
Chr04	1.18189
Chr04	0.388291
Chr04	-0.570871
Chr04	-0.552331
Chr04	0.341221
Chr04	0.216477
Chr04	-0.371997
Chr04	0.279606
Chr04	-0.145593
Chr04	-2.1386
Chr04	-0.20492
Chr04	-0.0226805
Chr04	-0.929911
Chr04	-0.0238086
Chr04	-0.0208501
Chr04	-0.0624362
Chr04	0.00409941
Chr04	-0.204988
Chr04	-0.682198
Chr04	-0.682198
Chr04	0.11293
Chr04	0.128849
Chr04	0.0646694
Chr04	-0.207839
Chr04	-0.256096
Chr04	-0.122443
Chr04	0.617671
Chr04	-0.0707544
Chr04	-0.0707544
Chr04	0.195725
Chr04	-0.387491
Chr04	-0.476458
Chr04	-0.170791
Chr04	-0.0212026
Chr04	-0.13888
Chr04	-0.0901288
Chr04	-0.0522811
Chr04	-0.387495
Chr04	-1.8088
Chr04	-0.402978
Chr04	-0.207322
Chr04	-0.0646083
Chr04	0.374339
Chr04	-0.167441
Chr04	-0.167441
Chr04	-0.167441
Chr04	-0.011993
Chr04	0.0427503
Chr04	-0.221813
Chr04	0.78577
Chr04	-0.301099
Chr04	0.135661
Chr04	0.0792073
Chr04	-0.0649358
Chr04	-0.72451
Chr04	-0.129045
Chr04	0.268234
Chr04	-0.108556
Chr04	-0.21349
Chr04	-0.463829
Chr04	0.0882205
Chr04	-0.344014
Chr04	-0.340153
Chr04	0.0785276
Chr04	-0.368952
Chr04	0.00306534
Chr04	0.118168
Chr04	-0.206312
Chr04	-1.25897
Chr04	0.00768117
Chr04	-0.630696
Chr04	-0.199144
Chr04	-0.432727
Chr04	1.299
Chr04	-0.1558
Chr04	-0.433503
Chr04	-0.366324
Chr04	0.320939
Chr04	0.0436867
Chr04	0.864096
Chr04	-0.110045
Chr04	0.441733
Chr04	-0.204926
Chr04	-0.0680335
Chr04	0.263484
Chr04	-0.101277
Chr04	0.100611
Chr04	-0.0631496
Chr04	-0.390409
Chr04	0.269497
Chr04	0.0339995
Chr04	-0.363271
Chr04	-0.363271
Chr04	0.412784
Chr04	0.325448
Chr04	-0.421379
Chr04	0.289693
Chr04	-0.297258
Chr04	-0.108851
Chr04	-6.17495
Chr04	-6.17495
Chr04	0.67713
Chr04	0.347456
Chr04	0.0365181
Chr04	0.141292
Chr04	-0.209191
Chr04	-0.57084
Chr04	-0.317751
Chr04	-0.114292
Chr04	-0.065015
Chr04	0.0589872
Chr04	-0.377388
Chr04	-0.0486083
Chr04	0.991016
Chr04	-0.306058
Chr04	-0.725283
Chr04	-0.377008
Chr04	-0.321022
Chr04	-0.0339294
Chr04	0.0770302
Chr04	0.206956
Chr04	0.206956
Chr04	-0.210367
Chr04	2.28758
Chr04	-0.840797
Chr04	-0.490055
Chr04	-0.166766
Chr04	-0.9072
Chr04	-0.174937
Chr04	-0.0714537
Chr04	-0.0546248
Chr04	0.0614548
Chr04	0.195404
Chr04	-0.42526
Chr04	-2.45067
Chr04	-15.7635
Chr04	0.646152
Chr04	0.924972
Chr04	-0.186306
Chr04	-0.137291
Chr04	-0.44869
Chr04	-0.179806
Chr04	-0.316506
Chr04	0.327482
Chr04	-0.680374
Chr04	-0.784455
Chr04	1.03469
Chr04	-0.359816
Chr04	-0.359816
Chr04	-0.547266
Chr04	-0.187063
Chr04	-0.193114
Chr04	-1.0291
Chr04	-0.0598822
Chr04	-0.175895
Chr04	-0.621031
Chr04	-0.0785936
Chr04	-0.856593
Chr04	0.698028
Chr04	-0.374465
Chr04	-0.245142
Chr04	-0.176199
Chr04	0.0276657
Chr04	-0.319615
Chr04	-0.383055
Chr04	-0.0434602
Chr04	-0.212139
Chr04	0.0175391
Chr04	-0.179516
Chr04	-0.29472
Chr04	-0.399125
Chr04	-0.916535
Chr04	-0.336465
Chr04	-0.000597337
Chr04	-0.380235
Chr04	0.204044
Chr04	0.0394096
Chr04	-0.552188
Chr04	-0.0488115
Chr04	0.580468
Chr04	-0.281928
Chr04	0.236183
Chr04	-0.33121
Chr04	0.367875
Chr04	-0.0927006
Chr04	-0.224711
Chr04	-0.372791
Chr04	0.105957
Chr04	0.0531294
Chr04	0.389205
Chr04	-0.552305
Chr04	-0.0150421
Chr04	-0.0380113
Chr04	0.320906
Chr04	-0.0297596
Chr04	-0.51714
Chr04	-0.0792292
Chr04	-0.0792292
Chr04	0.0250957
Chr04	0.850571
Chr04	0.157078
Chr04	0.0400723
Chr04	0.333199
Chr04	-0.244036
Chr04	-0.244036
Chr04	-0.244036
Chr04	-0.244036
Chr04	-0.244036
Chr04	-0.244036
Chr04	-0.269794
Chr04	-0.517339
Chr04	-0.476527
Chr04	-0.476527
Chr04	-0.554539
Chr04	-0.0930118
Chr04	-0.201173
Chr04	-0.680891
Chr04	-0.527911
Chr04	-0.435295
Chr04	-0.435295
Chr04	-0.0352149
Chr04	0.232434
Chr04	-0.0263483
Chr04	-0.315711
Chr04	-0.315711
Chr04	-0.0872577
Chr04	-0.172568
Chr04	-0.221089
Chr04	-0.329809
Chr04	-0.329809
Chr04	-0.51804
Chr04	0.39007
Chr04	0.0712192
Chr04	-0.334374
Chr04	-0.688677
Chr04	-0.136328
Chr04	-0.0336967
Chr04	-0.0336967
Chr04	-0.153107
Chr04	-0.700307
Chr04	-0.700307
Chr04	0.0256145
Chr04	0.468027
Chr04	-0.153179
Chr04	-0.247496
Chr04	-1.06216
Chr04	0.116857
Chr04	-0.229872
Chr04	-0.4911
Chr04	-0.603163
Chr04	-0.169785
Chr04	-0.330205
Chr04	-0.20251
Chr04	-4.49235e-05
Chr04	0.0583725
Chr04	0.0651094
Chr04	0.0651094
Chr04	-0.00935711
Chr04	-0.899363
Chr04	-0.899363
Chr04	-1.20531
Chr04	-0.191022
Chr04	-0.0952826
Chr04	-0.0876295
Chr04	-0.438268
Chr04	-0.173569
Chr04	-0.117473
Chr04	-0.152774
Chr04	-0.243733
Chr04	-0.875109
Chr04	-0.32923
Chr04	-0.32923
Chr04	-0.32923
Chr04	-0.32923
Chr04	-0.300073
Chr04	-0.379656
Chr04	-0.379656
Chr04	0.437968
Chr04	0.437968
Chr04	-0.253632
Chr04	-0.473733
Chr04	-0.154158
Chr04	0.0804392
Chr04	-0.0743772
Chr04	0.0477272
Chr04	-0.258179
Chr04	0.0195502
Chr04	0.0698439
Chr04	-0.063003
Chr04	-0.0846897
[truncated: 14,604 more rows]
