# Supplementary material for: Prophage-encoded Hm-oscar gene recapitulates Wolbachia-induced male-killing in the tea tortrix moth Homona magnanima
Source: eLife. 2025 Apr 14;13:RP101101. doi: 10.7554/eLife.101101 (PMC11996169; doi:10.7554/eLife.101101)
Supplement: Figure 3—source data 4. [file elife-101101-fig3-data4.xlsx]

## Sheet: Steel.Dwass Fig.3b-GFP
	comparison	t.value	p.value		Label	Comparison	Chr01	Chr02	Chr03	Chr04	Chr05	Chr06	Chr07	Chr08	Chr09	Chr10	Chr11	Chr12	Chr13	Chr14	Chr15	Chr16	Chr17	Chr18	Chr19	Chr20	Chr21	Chr22	Chr23	Chr24	Chr25	Chr26	Chr27	Chr28
1	Chr01:Chr02	4.60177	0.00140484		CI	Chr01		Yes	No	No	Yes	No	Yes	No	No	Yes	No	No	No	Yes	No	No	No	No	No	No	No	No	Yes	Yes	Yes	No	Yes	No
2	Chr01:Chr03	3.34536	0.155078		AG	Chr02	Yes		No	No	No	No	No	No	No	No	No	No	Yes	No	Yes	No	No	No	No	No	Yes	No	No	No	No	No	No	No
3	Chr01:Chr04	2.57114	0.697097		BDGI	Chr03	No	No		No	No	No	No	No	No	No	No	No	No	No	No	No	No	No	No	No	Yes	No	No	No	Yes	No	No	No
4	Chr01:Chr05	4.06214	0.0140638		CDG	Chr04	No	No	No		No	No	No	No	No	No	No	No	No	No	No	No	No	No	No	No	No	No	No	No	Yes	No	Yes	No
5	Chr01:Chr06	2.84772	0.472284		BG	Chr05	Yes	No	No	No		No	No	No	No	No	No	No	No	No	Yes	No	No	No	No	No	Yes	No	No	No	Yes	No	No	No
6	Chr01:Chr07	3.91499	0.0245996		BCG	Chr06	No	No	No	No	No		No	No	No	No	No	No	No	No	No	No	No	No	No	No	No	No	No	No	Yes	No	No	No
7	Chr01:Chr08	2.77435	0.532337		ABDFGH	Chr07	Yes	No	No	No	No	No		No	No	No	No	No	No	No	Yes	No	No	No	No	No	Yes	No	No	No	No	No	No	No
8	Chr01:Chr09	3.2865	0.181584		CDG	Chr08	No	No	No	No	No	No	No		No	No	No	No	No	No	No	No	No	No	No	No	No	No	No	No	Yes	No	Yes	No
9	Chr01:Chr10	5.67426	5.17012e-06		DEFGI	Chr09	No	No	No	No	No	No	No	No		No	No	No	No	No	No	No	No	No	No	No	Yes	No	No	No	Yes	No	Yes	No
10	Chr01:Chr11	3.58539	0.0763017		AG	Chr10	Yes	No	No	No	No	No	No	No	No		No	No	Yes	No	Yes	No	No	No	No	No	Yes	No	No	No	No	No	No	No
11	Chr01:Chr12	1.94297	0.980072		DEGI	Chr11	No	No	No	No	No	No	No	No	No	No		No	No	No	No	No	No	No	No	No	Yes	No	No	No	Yes	No	Yes	No
12	Chr01:Chr13	1.06419	1		CDG	Chr12	No	No	No	No	No	No	No	No	No	No	No		No	No	No	No	No	No	No	No	No	No	No	No	Yes	No	Yes	No
13	Chr01:Chr14	4.40514	0.00339806		CEHI	Chr13	No	Yes	No	No	No	No	No	No	No	Yes	No	No		No	No	No	No	No	No	No	No	No	Yes	Yes	Yes	No	Yes	No
14	Chr01:Chr15	0.509875	1		ABDFGH	Chr14	Yes	No	No	No	No	No	No	No	No	No	No	No	No		Yes	No	No	No	No	No	Yes	No	No	No	No	No	No	No
15	Chr01:Chr16	3.03513	0.329819		CEI	Chr15	No	Yes	No	No	Yes	No	Yes	No	No	Yes	No	No	No	Yes		No	No	No	No	No	No	No	Yes	Yes	Yes	No	Yes	No
16	Chr01:Chr17	3.23751	0.206017		CDG	Chr16	No	No	No	No	No	No	No	No	No	No	No	No	No	No	No		No	No	No	No	No	No	No	No	Yes	No	Yes	No
17	Chr01:Chr18	2.64976	0.634814		DGI	Chr17	No	No	No	No	No	No	No	No	No	No	No	No	No	No	No	No		No	No	No	Yes	No	No	No	Yes	No	Yes	No
18	Chr01:Chr19	3.37056	0.144657		CDG	Chr18	No	No	No	No	No	No	No	No	No	No	No	No	No	No	No	No	No		No	No	No	No	No	No	Yes	No	Yes	No
19	Chr01:Chr20	1.63186	0.998433		DGI	Chr19	No	No	No	No	No	No	No	No	No	No	No	No	No	No	No	No	No	No		No	Yes	No	No	No	Yes	No	Yes	No
20	Chr01:Chr21	0.0591	1		CDG	Chr20	No	No	No	No	No	No	No	No	No	No	No	No	No	No	No	No	No	No	No		No	No	No	No	Yes	No	Yes	No
21	Chr01:Chr22	2.0749	0.955826		C	Chr21	No	Yes	Yes	No	Yes	No	Yes	No	Yes	Yes	Yes	No	No	Yes	No	No	Yes	No	Yes	No		No	Yes	Yes	Yes	No	Yes	No
22	Chr01:Chr23	5.31556	3.87785e-05		CDG	Chr22	No	No	No	No	No	No	No	No	No	No	No	No	No	No	No	No	No	No	No	No	No		No	No	Yes	No	Yes	No
23	Chr01:Chr24	4.87188	0.000386725		ABDF	Chr23	Yes	No	No	No	No	No	No	No	No	No	No	No	Yes	No	Yes	No	No	No	No	No	Yes	No		No	No	No	No	No
24	Chr01:Chr25	7.23108	1.81182e-10		ABDF	Chr24	Yes	No	No	No	No	No	No	No	No	No	No	No	Yes	No	Yes	No	No	No	No	No	Yes	No	No		No	No	No	No
25	Chr01:Chr26	2.98151	0.368335		A	Chr25	Yes	No	Yes	Yes	Yes	Yes	No	Yes	Yes	No	Yes	Yes	Yes	No	Yes	Yes	Yes	Yes	Yes	Yes	Yes	Yes	No	No		No	No	No
26	Chr01:Chr27	6.45286	4.13397e-08		ACDG	Chr26	No	No	No	No	No	No	No	No	No	No	No	No	No	No	No	No	No	No	No	No	No	No	No	No	No		No	No
27	Chr01:Chr28	2.62617	0.653814		AB	Chr27	Yes	No	No	Yes	No	No	No	Yes	Yes	No	Yes	Yes	Yes	No	Yes	Yes	Yes	Yes	Yes	Yes	Yes	Yes	No	No	No	No		No
28	Chr02:Chr15	4.50141	0.00221843		ACDG	Chr28	No	No	No	No	No	No	No	No	No	No	No	No	No	No	No	No	No	No	No	No	No	No	No	No	No	No	No
29	Chr03:Chr15	3.30746	0.171789
30	Chr04:Chr15	2.4095	0.811136
31	Chr05:Chr15	4.11092	0.0116047
32	Chr06:Chr15	2.7182	0.57874
33	Chr07:Chr15	3.92375	0.0238153
34	Chr08:Chr15	2.717	0.579731
35	Chr09:Chr15	3.19167	0.230859
36	Chr10:Chr15	5.97383	8.67277e-07
37	Chr11:Chr15	3.56386	0.0816537
38	Chr12:Chr15	1.74836	0.995406
39	Chr13:Chr15	0.737458	1
40	Chr14:Chr15	4.28008	0.00580892
41	Chr15:Chr16	2.90139	0.429461
42	Chr15:Chr17	3.05959	0.312978
43	Chr15:Chr18	2.51513	0.739171
44	Chr15:Chr19	3.22602	0.21206
45	Chr15:Chr20	1.42898	0.999843
46	Chr15:Chr21	0.448688	1
47	Chr15:Chr22	1.97327	0.97576
48	Chr15:Chr23	5.40354	2.39564e-05
49	Chr15:Chr24	4.95938	0.000250041
50	Chr15:Chr25	7.3497	7.52194e-11
51	Chr15:Chr26	2.94679	0.394347
52	Chr15:Chr27	6.7062	7.53599e-09
53	Chr15:Chr28	2.42143	0.803568
54	Chr21:Chr27	7.93583	1.17595e-12
55	Chr10:Chr21	6.96622	1.22948e-09
56	Chr21:Chr25	7.9425	1.13298e-12
57	Chr21:Chr23	6.35031	8.08601e-08
58	Chr21:Chr24	5.62008	7.07022e-06
59	Chr02:Chr21	4.93053	0.000288981
60	Chr05:Chr21	4.90619	0.000326278
61	Chr07:Chr21	4.83192	0.000470599
62	Chr14:Chr21	4.707	0.000858737
63	Chr11:Chr21	4.19265	0.00834695
64	Chr19:Chr21	4.10657	0.011807
65	Chr03:Chr21	4.0494	0.0147798
66	Chr09:Chr21	3.85495	0.0306205
67	Chr17:Chr21	3.8311	0.033351
68	Chr21:Chr26	3.65712	0.060539
69	Chr16:Chr21	3.52787	0.0912829
70	Chr08:Chr21	3.5204	0.0933942
71	Chr06:Chr21	3.45469	0.113715
72	Chr04:Chr21	3.36934	0.145151
73	Chr18:Chr21	3.23756	0.205987
74	Chr21:Chr28	2.90571	0.426074
75	Chr21:Chr22	2.753	0.54998
76	Chr12:Chr21	2.37404	0.832711
77	Chr20:Chr21	2.08054	0.95444
78	Chr13:Chr21	1.28601	0.999979
79	Chr13:Chr25	6.55592	2.08435e-08
80	Chr04:Chr25	5.57716	9.04036e-06
81	Chr12:Chr25	5.3414	3.36936e-05
82	Chr22:Chr25	5.16268	8.77913e-05
83	Chr20:Chr25	5.02722	0.000177235
84	Chr19:Chr25	4.9861	0.000218481
85	Chr11:Chr25	4.75234	0.000691776
86	Chr08:Chr25	4.66087	0.00106726
87	Chr17:Chr25	4.34114	0.00448234
88	Chr16:Chr25	4.30425	0.00524539
89	Chr18:Chr25	4.27524	0.00592816
90	Chr06:Chr25	4.18317	0.00867647
91	Chr09:Chr25	4.03789	0.0154548
92	Chr05:Chr25	3.90528	0.0254955
93	Chr03:Chr25	3.88655	0.0273065
94	Chr10:Chr25	3.112	0.278565
95	Chr25:Chr28	3.079	0.299966
96	Chr25:Chr26	2.96863	0.377888
97	Chr07:Chr25	2.7335	0.566098
98	Chr23:Chr25	2.4503	0.784632
99	Chr24:Chr25	2.30456	0.870784
100	Chr14:Chr25	1.93745	0.980788
101	Chr25:Chr27	0.753055	1
102	Chr02:Chr25	0.419409	1
103	Chr13:Chr27	5.99111	7.80239e-07
104	Chr04:Chr27	5.17037	8.43078e-05
105	Chr22:Chr27	5.00193	0.000201623
106	Chr12:Chr27	4.97792	0.000227716
107	Chr20:Chr27	4.68498	0.000952922
108	Chr08:Chr27	4.4256	0.00310673
109	Chr19:Chr27	4.06678	0.0138114
110	Chr11:Chr27	4.01795	0.0166901
111	Chr18:Chr27	3.96922	0.0200925
112	Chr09:Chr27	3.80701	0.0363246
113	Chr17:Chr27	3.77827	0.0401737
114	Chr16:Chr27	3.73032	0.0473873
115	Chr06:Chr27	3.64151	0.0637129
116	Chr03:Chr27	3.23796	0.205781
117	Chr05:Chr27	3.0764	0.30169
118	Chr26:Chr27	2.83083	0.485987
119	Chr27:Chr28	2.70821	0.586984
120	Chr07:Chr27	2.52004	0.73558
121	Chr10:Chr27	2.45107	0.784113
122	Chr24:Chr27	2.01156	0.969304
123	Chr14:Chr27	1.71213	0.996655
124	Chr23:Chr27	1.68218	0.997456
125	Chr02:Chr27	0.090999	1
126	Chr10:Chr13	4.69896	0.00089205
127	Chr13:Chr23	4.64664	0.00114076
128	Chr13:Chr24	4.04611	0.0149698
129	Chr02:Chr13	4.03403	0.0156873
130	Chr13:Chr14	3.60096	0.0726167
131	Chr04:Chr23	3.56166	0.0822169
132	Chr12:Chr23	3.54123	0.0876056
133	Chr02:Chr03	2.22892	0.905618
134	Chr02:Chr04	3.25007	0.199544
135	Chr02:Chr05	2.1081	0.947208
136	Chr02:Chr06	2.56758	0.699838
137	Chr02:Chr07	1.58378	0.999043
138	Chr02:Chr08	2.7523	0.550559
139	Chr02:Chr09	2.37447	0.832459
140	Chr02:Chr10	1.33148	0.999959
141	Chr02:Chr11	2.62506	0.654705
142	Chr02:Chr12	3.29932	0.175546
143	Chr02:Chr14	1.17954	0.999996
144	Chr02:Chr16	2.57664	0.69285
145	Chr02:Chr17	2.56772	0.699734
146	Chr02:Chr18	2.66744	0.620441
147	Chr02:Chr19	2.7216	0.575939
148	Chr02:Chr20	3.27634	0.18647
149	Chr02:Chr22	3.21377	0.218639
150	Chr02:Chr23	1.19252	0.999995
151	Chr02:Chr24	1.38545	0.999912
152	Chr02:Chr26	1.87727	0.987337
153	Chr02:Chr28	2.02952	0.965855
154	Chr03:Chr04	1.42718	0.999847
155	Chr03:Chr05	0.397389	1
156	Chr03:Chr06	0.455776	1
157	Chr03:Chr07	0.726508	1
158	Chr03:Chr08	0.813569	1
159	Chr03:Chr09	0.248495	1
160	Chr03:Chr10	1.24938	0.999988
161	Chr03:Chr11	0.275544	1
162	Chr03:Chr12	1.6591	0.997955
163	Chr03:Chr13	2.61385	0.663642
164	Chr03:Chr14	1.26824	0.999984
165	Chr03:Chr16	0.352274	1
166	Chr03:Chr17	0.444687	1
167	Chr03:Chr18	0.715191	1
168	Chr03:Chr19	0.757195	1
169	Chr03:Chr20	1.58362	0.999044
170	Chr03:Chr22	1.44252	0.999813
171	Chr03:Chr23	1.75978	0.994938
172	Chr03:Chr24	1.29743	0.999975
173	Chr03:Chr26	0.190109	1
174	Chr03:Chr28	0.0287177	1
175	Chr04:Chr05	1.99624	0.97203
176	Chr04:Chr06	0.888779	1
177	Chr04:Chr07	2.17089	0.927683
178	Chr04:Chr08	0.581213	1
179	Chr04:Chr09	1.05532	1
180	Chr04:Chr10	3.49115	0.102045
181	Chr04:Chr11	1.26513	0.999985
182	Chr04:Chr12	0.451142	1
183	Chr04:Chr13	1.57544	0.999124
184	Chr04:Chr14	2.47719	0.766242
185	Chr04:Chr16	0.924896	1
186	Chr04:Chr17	0.939165	1
187	Chr04:Chr18	0.487704	1
188	Chr04:Chr19	0.897504	1
189	Chr04:Chr20	0.463421	1
190	Chr04:Chr22	0.15632	1
191	Chr04:Chr24	2.97107	0.376073
192	Chr04:Chr26	1.3337	0.999957
193	Chr04:Chr28	0.984621	1
194	Chr05:Chr06	0.876225	1
195	Chr05:Chr07	0.425151	1
196	Chr05:Chr08	1.33776	0.999955
197	Chr05:Chr09	0.696988	1
198	Chr05:Chr10	1.16495	0.999997
199	Chr05:Chr11	0.801522	1
200	Chr05:Chr12	2.13141	0.940465
201	Chr05:Chr13	3.23781	0.205858
202	Chr05:Chr14	1.00483	1
203	Chr05:Chr16	0.855545	1
204	Chr05:Chr17	0.86805	1
205	Chr05:Chr18	1.14237	0.999998
206	Chr05:Chr19	1.13266	0.999998
207	Chr05:Chr20	2.04817	0.961967
208	Chr05:Chr22	1.95298	0.97872
209	Chr05:Chr23	1.50061	0.999621
210	Chr05:Chr24	1.07611	0.999999
211	Chr05:Chr26	0.160123	1
212	Chr05:Chr28	0.357616	1
213	Chr06:Chr07	1.13263	0.999998
214	Chr06:Chr08	0.358604	1
215	Chr06:Chr09	0.162776	1
216	Chr06:Chr10	1.71219	0.996653
217	Chr06:Chr11	0.229962	1
218	Chr06:Chr12	1.14894	0.999998
219	Chr06:Chr13	2.07639	0.955463
220	Chr06:Chr14	1.61752	0.998643
221	Chr06:Chr16	0.0379755	1
222	Chr06:Chr17	0.0474962	1
223	Chr06:Chr18	0.296134	1
224	Chr06:Chr19	0.02061	1
225	Chr06:Chr20	1.12796	0.999999
226	Chr06:Chr22	0.954694	1
227	Chr06:Chr23	2.20547	0.915014
228	Chr06:Chr24	1.72902	0.996114
229	Chr06:Chr26	0.518975	1
230	Chr06:Chr28	0.302797	1
231	Chr07:Chr08	1.52491	0.999498
232	Chr07:Chr09	1.10467	0.999999
233	Chr07:Chr10	0.352713	1
234	Chr07:Chr11	1.09069	0.999999
235	Chr07:Chr12	2.33761	0.853384
236	Chr07:Chr13	3.27514	0.187056
237	Chr07:Chr14	0.419278	1
238	Chr07:Chr16	1.14864	0.999998
239	Chr07:Chr17	1.25511	0.999987
240	Chr07:Chr18	1.46054	0.999766
241	Chr07:Chr19	1.4386	0.999823
242	Chr07:Chr20	2.20261	0.916118
243	Chr07:Chr22	2.09567	0.950567
244	Chr07:Chr23	0.908345	1
245	Chr07:Chr24	0.52738	1
246	Chr07:Chr26	0.477404	1
247	Chr07:Chr28	0.683534	1
248	Chr08:Chr09	0.440345	1
249	Chr08:Chr10	2.45551	0.781124
250	Chr08:Chr11	0.610497	1
251	Chr08:Chr12	0.893993	1
252	Chr08:Chr13	1.90688	0.984389
253	Chr08:Chr14	1.96425	0.977113
254	Chr08:Chr16	0.356306	1
255	Chr08:Chr17	0.343491	1
256	Chr08:Chr18	0.0164015	1
257	Chr08:Chr19	0.207921	1
258	Chr08:Chr20	0.860877	1
259	Chr08:Chr22	0.637844	1
260	Chr08:Chr23	2.73911	0.56146
261	Chr08:Chr24	2.23489	0.903124
262	Chr08:Chr26	0.873713	1
263	Chr08:Chr28	0.584346	1
264	Chr09:Chr10	1.78908	0.993551
265	Chr09:Chr11	0.000731138	1
266	Chr09:Chr12	1.38876	0.999908
267	Chr09:Chr13	2.38729	0.824815
268	Chr09:Chr14	1.46767	0.999745
269	Chr09:Chr16	0.143651	1
270	Chr09:Chr17	0.188312	1
271	Chr09:Chr18	0.393566	1
272	Chr09:Chr19	0.392999	1
273	Chr09:Chr20	1.35407	0.999943
274	Chr09:Chr22	1.12347	0.999999
275	Chr09:Chr23	2.10744	0.947391
276	Chr09:Chr24	1.58267	0.999054
277	Chr09:Chr26	0.490971	1
278	Chr09:Chr28	0.136249	1
279	Chr10:Chr11	1.99173	0.972795
280	Chr10:Chr12	3.40852	0.129981
281	Chr10:Chr14	0.0215939	1
282	Chr10:Chr16	1.93708	0.980835
283	Chr10:Chr17	2.11407	0.945538
284	Chr10:Chr18	2.28736	0.879316
285	Chr10:Chr19	2.29101	0.877534
286	Chr10:Chr20	3.10996	0.27986
287	Chr10:Chr22	3.12597	0.269793
288	Chr10:Chr23	0.761047	1
289	Chr10:Chr24	0.0242515	1
290	Chr10:Chr26	0.947558	1
291	Chr10:Chr28	1.09494	0.999999
292	Chr11:Chr12	1.51832	0.999535
293	Chr11:Chr13	2.65242	0.632654
294	Chr11:Chr14	1.67504	0.99762
295	Chr11:Chr16	0.156124	1
296	Chr11:Chr17	0.153125	1
297	Chr11:Chr18	0.467579	1
298	Chr11:Chr19	0.342128	1
299	Chr11:Chr20	1.43229	0.999836
300	Chr11:Chr22	1.28273	0.99998
301	Chr11:Chr23	2.32768	0.858749
302	Chr11:Chr24	1.81477	0.992086
303	Chr11:Chr26	0.410374	1
304	Chr11:Chr28	0.184099	1
305	Chr12:Chr13	0.985331	1
306	Chr12:Chr14	2.59673	0.677179
307	Chr12:Chr16	1.19951	0.999995
308	Chr12:Chr17	1.21369	0.999994
309	Chr12:Chr18	0.810277	1
310	Chr12:Chr19	1.25464	0.999987
311	Chr12:Chr20	0.0570929	1
312	Chr12:Chr22	0.259817	1
313	Chr12:Chr24	2.97558	0.372715
314	Chr12:Chr26	1.56348	0.99923
315	Chr12:Chr28	1.1946	0.999995
316	Chr13:Chr16	2.15417	0.933312
317	Chr13:Chr17	2.3015	0.872323
318	Chr13:Chr18	1.79837	0.99305
319	Chr13:Chr19	2.44187	0.790246
320	Chr13:Chr20	0.806041	1
321	Chr13:Chr22	1.24892	0.999988
322	Chr13:Chr26	2.34374	0.850014
323	Chr13:Chr28	1.93044	0.981666
324	Chr14:Chr16	1.71255	0.996642
325	Chr14:Chr17	1.62728	0.998503
326	Chr14:Chr18	1.80738	0.992533
327	Chr14:Chr19	1.68149	0.997472
328	Chr14:Chr20	2.48275	0.762354
329	Chr14:Chr22	2.39938	0.817435
330	Chr14:Chr23	0.242461	1
331	Chr14:Chr24	0.0241273	1
332	Chr14:Chr26	0.895491	1
333	Chr14:Chr28	1.17634	0.999997
334	Chr16:Chr17	0.0294042	1
335	Chr16:Chr18	0.289459	1
336	Chr16:Chr19	0.182069	1
337	Chr16:Chr20	1.20452	0.999994
338	Chr16:Chr22	0.989251	1
339	Chr16:Chr23	2.22413	0.907592
340	Chr16:Chr24	1.80852	0.992466
341	Chr16:Chr26	0.504524	1
342	Chr16:Chr28	0.272527	1
343	Chr17:Chr18	0.337629	1
344	Chr17:Chr19	0.000305185	1
345	Chr17:Chr20	1.25212	0.999988
346	Chr17:Chr22	0.985674	1
347	Chr17:Chr23	2.30834	0.868857
348	Chr17:Chr24	1.84172	0.990261
349	Chr17:Chr26	0.519831	1
350	Chr17:Chr28	0.220087	1
351	Chr18:Chr19	0.377452	1
352	Chr18:Chr20	0.84979	1
353	Chr18:Chr22	0.607294	1
354	Chr18:Chr23	2.45495	0.781502
355	Chr18:Chr24	2.01979	0.967758
356	Chr18:Chr26	0.766895	1
357	Chr18:Chr28	0.49447	1
358	Chr19:Chr20	1.21829	0.999993
359	Chr19:Chr22	0.959997	1
360	Chr19:Chr23	2.75283	0.550119
361	Chr19:Chr24	2.07762	0.95516
362	Chr19:Chr26	0.607585	1
363	Chr19:Chr28	0.337944	1
364	Chr20:Chr22	0.250136	1
365	Chr20:Chr23	3.3449	0.155273
366	Chr20:Chr24	2.77757	0.529683
367	Chr20:Chr26	1.50488	0.999602
368	Chr20:Chr28	1.20094	0.999995
369	Chr22:Chr23	3.35996	0.148977
370	Chr22:Chr24	2.82423	0.491366
371	Chr22:Chr26	1.37704	0.999921
372	Chr22:Chr28	1.06429	1
373	Chr23:Chr24	0.402248	1
374	Chr23:Chr26	1.33213	0.999958
375	Chr23:Chr28	1.45108	0.999792
376	Chr24:Chr26	0.937861	1
377	Chr24:Chr28	1.07801	0.999999
378	Chr26:Chr28	0.166703	1
