# Supplementary material for: Prophage-encoded Hm-oscar gene recapitulates Wolbachia-induced male-killing in the tea tortrix moth Homona magnanima
Source: eLife. 2025 Apr 14;13:RP101101. doi: 10.7554/eLife.101101 (PMC11996169; doi:10.7554/eLife.101101)
Supplement: Figure 3—source data 5. [file elife-101101-fig3-data5.xlsx]

## Sheet: Sheet1
Fig.3c
chromosome	Log2[WOLM-WOLF]
Chr01	-0.510588
Chr01	0.28945
Chr01	0.222054
Chr01	0.161451
Chr01	0.26605
Chr01	0.761444
Chr01	0.218149
Chr01	0.240108
Chr01	0.254321
Chr01	0.138017
Chr01	1.77083
Chr01	0.414925
Chr01	-0.552615
Chr01	0.426132
Chr01	0.0853756
Chr01	0.432698
Chr01	0.79562
Chr01	0.611848
Chr01	0.54784
Chr01	0.449845
Chr01	0.568554
Chr01	0.568554
Chr01	0.546595
Chr01	0.357786
Chr01	0.110081
Chr01	0.386213
Chr01	0.988606
Chr01	0.360995
Chr01	0.183411
Chr01	0.204657
Chr01	0.848819
Chr01	0.529403
Chr01	0.54251
Chr01	0.476429
Chr01	0.177771
Chr01	0.617468
Chr01	0.309118
Chr01	0.708344
Chr01	0.125128
Chr01	0.662608
Chr01	0.522985
Chr01	0.871021
Chr01	0.646151
Chr01	0.44526
Chr01	0.397451
Chr01	1.64304
Chr01	0.836851
Chr01	0.568381
Chr01	0.568381
Chr01	-0.593905
Chr01	1.21483
Chr01	0.556048
Chr01	0.497577
Chr01	0.701304
Chr01	0.151151
Chr01	0.0136286
Chr01	0.290069
Chr01	0.420845
Chr01	0.302701
Chr01	0.0128107
Chr01	-0.232597
Chr01	0.913903
Chr01	-0.380998
Chr01	-0.10522
Chr01	0.487843
Chr01	-0.0578675
Chr01	1.00932
Chr01	0.586647
Chr01	-1.11968
Chr01	0.366097
Chr01	0.349003
Chr01	0.624752
Chr01	0.624752
Chr01	-0.101558
Chr01	0.102606
Chr01	0.854747
Chr01	0.722139
Chr01	0.405635
Chr01	0.794333
Chr01	0.344031
Chr01	0.157435
Chr01	0.0597495
Chr01	0.442052
Chr01	0.35597
Chr01	0.176895
Chr01	-0.0321603
Chr01	0.147916
Chr01	0.146938
Chr01	0.533437
Chr01	1.94353
Chr01	0.190095
Chr01	-0.022075
Chr01	1.03626
Chr01	-0.575422
Chr01	0.534834
Chr01	0.45004
Chr01	0.53395
Chr01	0.35561
Chr01	0.323859
Chr01	0.256664
Chr01	0.744799
Chr01	0.718748
Chr01	0.261235
Chr01	0.376546
Chr01	0.50991
Chr01	0.963891
Chr01	0.963891
Chr01	-0.0732674
Chr01	-0.0732674
Chr01	0.400151
Chr01	0.400151
Chr01	0.217778
Chr01	0.560598
Chr01	0.560598
Chr01	0.635395
Chr01	0.494623
Chr01	0.442947
Chr01	0.236701
Chr01	0.051616
Chr01	-0.511777
Chr01	-0.511777
Chr01	0.538289
Chr01	0.538289
Chr01	0.595145
Chr01	-0.0113186
Chr01	0.771559
Chr01	0.703163
Chr01	0.416847
Chr01	-0.0248415
Chr01	0.114024
Chr01	0.0612982
Chr01	-0.109779
Chr01	0.0290753
Chr01	0.552406
Chr01	0.105879
Chr01	0.041824
Chr01	0.0820547
Chr01	0.43546
Chr01	1.18853
Chr01	2.05087
Chr01	0.619907
Chr01	0.40667
Chr01	0.40667
Chr01	0.482645
Chr01	-1.31741
Chr01	0.0593262
Chr01	0.435303
Chr01	0.139963
Chr01	0.139963
Chr01	0.375527
Chr01	-0.0880846
Chr01	0.210943
Chr01	-0.00670245
Chr01	0.14882
Chr01	-0.645518
Chr01	1.55282
Chr01	1.28123
Chr01	0.272884
Chr01	0.257837
Chr01	0.108709
Chr01	0.0303485
Chr01	0.468112
Chr01	0.248451
Chr01	0.338122
Chr01	0.163402
Chr01	0.501787
Chr01	0.42965
Chr01	0.567824
Chr01	0.301911
Chr01	0.381118
Chr01	0.130561
Chr01	-0.708639
Chr01	0.302899
Chr01	0.294846
Chr01	1.03125
Chr01	0.0909623
Chr01	0.330642
Chr01	0.361319
Chr01	0.451451
Chr01	0.630628
Chr01	0.37271
Chr01	0.557566
Chr01	1.40603
Chr01	0.492356
Chr01	-0.13267
Chr01	0.46374
Chr01	0.333075
Chr01	0.246714
Chr01	0.205987
Chr01	0.387697
Chr01	0.72505
Chr01	0.958446
Chr01	0.565316
Chr01	-0.473747
Chr01	0.557131
Chr01	0.557131
Chr01	0.698295
Chr01	0.363594
Chr01	0.363594
Chr01	0.56934
Chr01	0.310413
Chr01	0.21585
Chr01	0.376872
Chr01	0.45022
Chr01	0.495335
Chr01	0.0638493
Chr01	0.284445
Chr01	0.625452
Chr01	0.443331
Chr01	0.296666
Chr01	0.628764
Chr01	0.749587
Chr01	0.453323
Chr01	0.325643
Chr01	0.627485
Chr01	0.104968
Chr01	0.278636
Chr01	0.443561
Chr01	-0.386732
Chr01	-0.18358
Chr01	-0.0992294
Chr01	-0.0179794
Chr01	0.451699
Chr01	0.424534
Chr01	0.451229
Chr01	0.917836
Chr01	0.483391
Chr01	0.483391
Chr01	0.647033
Chr01	0.233703
Chr01	0.407359
Chr01	0.407359
Chr01	1.05995
Chr01	0.11992
Chr01	0.588766
Chr01	0.239495
Chr01	0.149322
Chr01	0.413698
Chr01	0.663665
Chr01	0.663665
Chr01	0.284854
Chr01	0.144035
Chr01	-0.189828
Chr01	0.559692
Chr01	0.599479
Chr01	0.172217
Chr01	0.329992
Chr01	0.329992
Chr01	0.696632
Chr01	0.696632
Chr01	0.869075
Chr01	0.28665
Chr01	0.0995446
Chr01	0.0995446
Chr01	0.0995446
Chr01	0.0995446
Chr01	0.0995446
Chr01	0.0995446
Chr01	0.0995446
Chr01	0.0995446
Chr01	0.0995446
Chr01	0.0995446
Chr01	0.0995446
Chr01	0.0995446
Chr01	0.255018
Chr01	-0.235412
Chr01	-0.235412
Chr01	-0.235412
Chr01	-0.235412
Chr01	-0.235412
Chr01	-0.235412
Chr01	0.254022
Chr01	0.198642
Chr01	-0.323581
Chr01	0.334624
Chr01	0.334624
Chr01	0.334624
Chr01	0.334624
Chr01	0.334624
Chr01	0.394761
Chr01	0.394761
Chr01	0.394761
Chr01	0.394761
Chr01	0.394761
Chr01	0.15672
Chr01	-0.425478
Chr01	0.412292
Chr01	0.107871
Chr01	0.511647
Chr01	0.657915
Chr01	0.380178
Chr01	0.380178
Chr01	0.0889755
Chr01	-0.171854
Chr01	0.375465
Chr01	-0.23405
Chr01	0.475707
Chr01	0.509049
Chr01	0.622703
Chr01	0.735924
Chr01	0.735924
Chr01	0.676942
Chr01	-0.0315619
Chr01	-0.04038
Chr01	-0.177068
Chr02	-0.464466
Chr02	-0.624652
Chr02	-0.0892382
Chr02	0.0305651
Chr02	0.600904
Chr02	-0.423639
Chr02	-0.00667483
Chr02	-0.561978
Chr02	-0.0948071
Chr02	-0.0948071
Chr02	0.606889
Chr02	0.606889
Chr02	0.606889
Chr02	0.606889
Chr02	0.606889
Chr02	0.606889
Chr02	0.606889
Chr02	-0.237231
Chr02	-0.237231
Chr02	-0.237231
Chr02	0.556657
Chr02	0.158337
Chr02	-0.799114
Chr02	0.26103
Chr02	-0.123399
Chr02	-0.243325
Chr02	-0.119563
Chr02	-0.246105
Chr02	0.420668
Chr02	0.204943
Chr02	-0.334383
Chr02	-0.430437
Chr02	-0.430437
Chr02	0.417705
Chr02	-0.459432
Chr02	-0.391638
Chr02	-0.130431
Chr02	-0.478592
Chr02	0.10785
Chr02	-0.636782
Chr02	0.213048
Chr02	0.12703
Chr02	0.4066
Chr02	-0.452
Chr02	-0.326386
Chr02	-0.139026
Chr02	0.146165
Chr02	0.309715
Chr02	-0.357204
Chr02	-0.527034
Chr02	0.576321
Chr02	0.571099
Chr02	-0.481137
Chr02	-0.59711
Chr02	0.258655
Chr02	-0.0527508
Chr02	-0.162901
Chr02	0.273028
Chr02	0.524687
Chr02	0.0876275
Chr02	0.177588
Chr02	-0.422514
Chr02	-0.957244
Chr02	0.27857
Chr02	-0.603708
Chr02	-0.129506
Chr02	-0.674533
Chr02	0.0570311
Chr02	0.257955
Chr02	-0.127537
Chr02	-0.0190185
Chr02	-0.137218
Chr02	0.253399
Chr02	0.253635
Chr02	-0.508966
Chr02	0.162373
Chr02	-0.102345
Chr02	-0.121958
Chr02	-0.359739
Chr02	0.22986
Chr02	-0.109456
Chr02	0.0292698
Chr02	0.220677
Chr02	-0.904103
Chr02	-1.448
Chr02	0.286139
Chr02	0.380609
Chr02	0.540193
Chr02	-0.125477
Chr02	0.912717
Chr02	0.613425
Chr02	-0.802257
Chr02	-0.911735
Chr02	0.0234939
Chr02	-0.337067
Chr02	-0.18143
Chr02	0.0960894
Chr02	0.174709
Chr02	-0.250858
Chr02	0.215563
Chr02	0.18042
Chr02	0.194943
Chr02	0.136852
Chr02	-0.494606
Chr02	-0.17872
Chr02	0.475686
Chr02	-0.0708466
Chr02	-0.0479229
Chr02	0.249761
Chr02	-0.798265
Chr02	0.123322
Chr02	-0.627846
Chr02	-0.119637
Chr02	-0.520913
Chr02	-0.520913
Chr02	-0.211162
Chr02	-0.927674
Chr02	-0.650015
Chr02	-0.650015
Chr02	-0.650015
Chr02	-0.513213
Chr02	-0.513213
Chr02	-0.414199
Chr02	0.189389
Chr02	0.160705
Chr02	-0.0609489
Chr02	-0.0131376
Chr02	0.215608
Chr02	-0.0794734
Chr02	-0.439967
Chr03	0.0185519
Chr03	0.323014
Chr03	0.455567
Chr03	-0.322971
Chr03	-0.322971
Chr03	-0.291386
Chr03	0.803436
Chr03	0.812837
Chr03	-0.656532
Chr03	0.120164
Chr03	0.378577
Chr03	-0.140688
Chr03	-0.585305
Chr03	-0.64138
Chr03	0.921583
Chr03	-0.00543794
Chr03	0.184522
Chr03	0.0507493
Chr03	-0.224284
Chr03	0.506644
Chr03	-0.0328653
Chr03	0.051693
Chr03	-0.726789
Chr03	1.28804
Chr03	0.492037
Chr03	-0.219435
Chr03	0.373747
Chr03	0.727423
Chr03	0.247162
Chr03	-0.202091
Chr03	0.102887
Chr03	0.31361
Chr03	0.569649
Chr03	0.658451
Chr03	-0.427207
Chr03	0.112579
Chr03	0.041455
Chr03	0.100129
Chr03	0.100129
Chr03	-0.10235
Chr03	-0.143115
Chr03	-0.530735
Chr03	-0.380168
Chr03	0.0921421
Chr03	0.334479
Chr03	-0.210553
Chr03	-0.204567
Chr03	0.523877
Chr03	0.441493
Chr03	0.129221
Chr03	-0.246465
Chr03	-0.246465
Chr03	0.143559
Chr03	0.357912
Chr03	0.0889975
Chr03	0.00284554
Chr03	0.00284554
Chr03	-0.133767
Chr03	0.110471
Chr03	-0.97449
Chr03	-0.837818
Chr03	-0.515719
Chr03	-0.60998
Chr03	-0.123602
Chr03	0.045429
Chr03	0.0979475
Chr03	-0.145376
Chr03	0.000281683
Chr03	0.416826
Chr03	0.0479661
Chr03	0.11719
Chr03	0.359404
Chr03	-0.572745
Chr03	-0.494064
Chr03	1.24889
Chr03	-1.5906
Chr03	0.934834
Chr03	0.0728098
Chr03	0.512362
Chr03	0.230085
Chr03	0.019597
Chr03	0.142448
Chr03	-0.131746
Chr03	0.204582
Chr03	0.422815
Chr03	-0.297477
Chr03	-0.499852
Chr03	-0.132634
Chr03	0.0845999
Chr03	0.16766
Chr03	-0.493457
Chr03	0.0574876
Chr03	0.130164
Chr03	-1.12705
Chr03	1.02654
Chr03	-0.0494859
Chr03	0.090968
Chr03	0.29429
Chr03	-0.1759
Chr03	0.679516
Chr03	0.0139395
Chr03	0.00696777
Chr03	-0.306042
Chr03	-0.179225
Chr03	0.453848
Chr03	0.436635
Chr03	-0.10935
Chr03	-0.447955
Chr03	-0.137592
Chr03	-0.326036
Chr03	1.15806
Chr03	-0.0271241
Chr03	0.356469
Chr03	0.149159
Chr03	-0.986891
Chr03	-0.156569
Chr03	1.60312
Chr03	1.73472
Chr03	-0.210197
Chr03	-0.621277
Chr03	0.0995714
Chr03	-0.223801
Chr03	0.108108
Chr03	0.119277
Chr03	0.0287204
Chr03	-0.361897
Chr03	-0.108215
Chr03	-0.262515
Chr03	0.708327
Chr03	-0.00493563
Chr03	0.667479
Chr03	-0.0316625
Chr03	0.340348
Chr03	-0.365467
Chr03	-0.0830684
Chr03	-0.457734
Chr03	-0.151209
Chr03	-0.151209
Chr03	-0.207772
Chr03	-0.801212
Chr03	0.274451
Chr03	0.158259
Chr03	0.17633
Chr03	0.035074
Chr03	0.290183
Chr03	-0.286089
Chr03	-0.380455
Chr03	0.315065
Chr03	0.315065
Chr03	-0.51268
Chr03	0.161891
Chr03	-0.340576
Chr03	-0.333791
Chr03	0.445707
Chr03	-0.0980161
Chr03	-0.0980161
Chr03	0.359257
Chr03	1.08104
Chr03	-0.141585
Chr03	0.346438
Chr03	0.797808
Chr03	-0.0338306
Chr03	-0.160419
Chr03	0.457187
Chr03	-0.0689515
Chr03	0.532182
Chr03	0.444168
Chr03	0.444168
Chr03	0.0712938
Chr03	-0.292613
Chr03	-0.489181
Chr03	0.228319
Chr03	0.364828
Chr03	0.198256
Chr03	0.333646
Chr03	0.110226
Chr03	-0.0195112
Chr03	-0.0172951
Chr03	-0.0153479
Chr03	-0.670933
Chr03	-2.24194
Chr03	-0.018913
Chr03	-0.121716
Chr03	0.0160579
Chr03	0.048656
Chr03	-0.108988
Chr03	-0.0569293
Chr03	-0.490548
Chr03	-0.0319975
Chr03	0.390476
Chr03	0.489632
Chr03	0.0259328
Chr03	0.120141
Chr03	0.496777
Chr03	0.331191
Chr03	-0.0360554
Chr03	-0.0327702
Chr03	-0.0522393
Chr03	-0.0658375
Chr03	0.190733
Chr03	0.0489319
Chr03	-0.18607
Chr03	0.610842
Chr03	-0.0360682
Chr03	-0.30841
Chr03	-0.174766
Chr03	0.281291
Chr03	-0.191343
Chr03	0.197236
Chr03	0.270994
Chr03	0.515074
Chr03	0.196093
Chr03	0.382518
Chr03	-0.547348
Chr03	-1.4861
Chr03	-0.810237
Chr03	-0.39457
Chr03	0.156657
Chr03	0.0347893
Chr03	0.0877716
Chr03	0.346818
Chr03	0.686043
Chr03	-0.516957
Chr03	0.339127
Chr03	0.0793711
Chr03	0.247657
Chr03	0.0370839
Chr03	0.220886
Chr03	-0.818672
Chr03	-0.53358
Chr03	0.384984
Chr03	-0.0448874
Chr03	0.592318
Chr03	-0.346551
Chr03	0.0545468
Chr03	0.0364748
Chr03	-0.481548
Chr03	0.240873
Chr03	-0.279898
Chr03	0.642419
Chr03	-0.190519
Chr03	0.385615
Chr03	0.168227
Chr03	0.756705
Chr03	0.0370045
Chr03	-0.144861
Chr03	0.151261
Chr03	0.660959
Chr03	-0.215673
Chr03	-0.303013
Chr03	0.0162079
Chr03	0.0810849
Chr03	-0.694046
Chr03	-0.591698
Chr03	-0.33774
Chr03	-0.245334
Chr03	-0.121157
Chr03	-1.04959
Chr03	0.284811
Chr03	-0.0583211
Chr03	-0.0837032
Chr03	-0.291571
Chr03	-0.0807032
Chr03	0.0905489
Chr03	0.399271
Chr03	0.463701
Chr03	-0.268783
Chr03	0.5631
Chr03	0.180883
Chr03	0.361467
Chr03	-0.480261
Chr03	0.267821
Chr03	0.0304395
Chr03	0.286121
Chr03	-0.330116
Chr03	0.39241
Chr03	-0.0530573
Chr03	0.215297
Chr03	-0.278898
Chr03	-0.222073
Chr03	-0.150613
Chr03	0.00356547
Chr03	-0.368223
Chr03	-0.236184
Chr03	-0.0440411
Chr03	-0.924851
Chr03	0.186838
Chr03	0.378312
Chr03	-1.22968
Chr03	0.102871
Chr03	0.379955
Chr03	0.346232
Chr03	0.583574
Chr03	0.0131437
Chr03	0.688181
Chr03	-0.154654
Chr03	-0.105792
Chr03	0.0793013
Chr03	0.370365
Chr03	0.370365
Chr03	0.370365
Chr03	0.370365
Chr03	0.198696
Chr03	0.198696
Chr03	0.198696
Chr03	0.198696
Chr03	0.198696
Chr03	0.198696
Chr03	0.198696
Chr03	0.198696
Chr03	0.828064
Chr03	0.828064
Chr03	0.828064
Chr03	0.828064
Chr03	0.14481
Chr03	0.14481
Chr03	0.14481
Chr03	0.14481
Chr03	0.470898
Chr03	0.470898
Chr03	0.470898
Chr03	0.470898
Chr03	0.470898
Chr03	0.470898
Chr03	0.470898
Chr03	0.470898
Chr03	-0.39329
Chr03	-0.146259
Chr03	-0.392038
Chr03	0.155102
Chr03	-0.228871
Chr03	-0.586645
Chr03	-0.381096
Chr03	-0.0133992
Chr03	0.191685
Chr03	0.0449798
Chr03	-0.0218665
Chr03	0.372784
Chr03	0.420733
Chr03	-0.101807
Chr03	-0.181469
Chr03	-0.193607
Chr03	0.333663
Chr03	0.333663
Chr03	0.333663
Chr03	0.333663
Chr03	0.101347
Chr03	0.101347
Chr03	0.101347
Chr03	0.101347
Chr03	0.351986
Chr03	0.351986
Chr03	0.351986
Chr03	0.351986
Chr03	0.479121
Chr03	0.37838
Chr03	0.253218
Chr03	0.0028056
Chr03	0.294962
Chr03	0.268661
Chr03	0.995897
Chr03	0.147503
Chr03	0.147503
Chr03	-0.282482
Chr03	0.0856784
Chr03	-0.113132
Chr03	0.545771
Chr03	-0.243458
Chr04	0.927907
Chr04	-0.0270511
Chr04	-0.225968
Chr04	-0.262491
Chr04	-0.413743
Chr04	0.065455
Chr04	0.431863
Chr04	-0.598212
Chr04	0.104856
Chr04	0.0938664
Chr04	0.248812
Chr04	-0.145405
Chr04	0.0698448
Chr04	0.504743
Chr04	-0.437567
Chr04	0.171793
Chr04	0.261086
Chr04	1.44038
Chr04	-0.250463
Chr04	0.0483292
Chr04	-0.447574
Chr04	0.210958
Chr04	0.266591
Chr04	0.374346
Chr04	0.613372
Chr04	-0.0404596
Chr04	-0.516399
Chr04	0.469999
Chr04	-0.765346
Chr04	0.236366
Chr04	-0.758055
Chr04	0.145722
Chr04	0.130441
Chr04	0.0406206
Chr04	0.0749667
Chr04	0.136987
Chr04	0.392021
Chr04	0.0475941
Chr04	-0.0958287
Chr04	-0.79117
Chr04	-1.36542
Chr04	-0.0370869
Chr04	0.530212
Chr04	-0.516829
Chr04	-0.487976
Chr04	-0.744191
Chr04	-0.151101
Chr04	0.411499
Chr04	0.334455
Chr04	0.234825
Chr04	0.0622209
Chr04	0.684552
Chr04	0.0781718
Chr04	0.379864
Chr04	0.281692
Chr04	0.402467
Chr04	0.438211
Chr04	0.0397133
Chr04	-0.994925
Chr04	0.300317
Chr04	0.300317
Chr04	0.03443
Chr04	0.722029
Chr04	-0.334312
Chr04	-0.334312
Chr04	0.347022
Chr04	-0.703053
Chr04	1.03536
Chr04	0.549932
Chr04	0.090642
Chr04	-0.100385
Chr04	1.09828
Chr04	0.257829
Chr04	0.165221
Chr04	0.204093
Chr04	0.614441
Chr04	0.107995
Chr04	0.258316
Chr04	0.0873122
Chr04	0.0306145
Chr04	0.157465
Chr04	0.0110672
Chr04	0.157647
Chr04	-0.0679451
Chr04	0.246922
Chr04	0.246922
Chr04	0.712161
Chr04	0.276865
Chr04	0.155741
Chr04	-0.45036
Chr04	-0.134311
Chr04	0.0288548
Chr04	0.219334
Chr04	0.242116
Chr04	-0.38481
Chr04	-0.0931469
Chr04	-0.100022
Chr04	0.268078
Chr04	0.191277
Chr04	0.365397
Chr04	0.250657
Chr04	-0.244037
Chr04	0.487086
Chr04	-0.362627
Chr04	0.074463
Chr04	0.497381
Chr04	-0.356111
Chr04	-0.596977
Chr04	-0.809135
Chr04	-0.576198
Chr04	0.143803
Chr04	0.538186
Chr04	0.619367
Chr04	-0.283362
Chr04	0.78973
Chr04	-0.347989
Chr04	0.0667158
Chr04	1.19838
Chr04	-0.333475
Chr04	-0.0233785
Chr04	0.402767
Chr04	0.89721
Chr04	0.14895
Chr04	-0.476247
Chr04	0.180888
Chr04	0.466194
Chr04	0.210843
Chr04	0.0664694
Chr04	0.526039
Chr04	0.526039
Chr04	0.302904
Chr04	-0.0920673
Chr04	0.176533
Chr04	0.15109
Chr04	0.15109
Chr04	-0.0262921
Chr04	0.357661
Chr04	-0.0359182
Chr04	0.0591869
Chr04	0.071629
Chr04	0.283992
Chr04	0.283992
Chr04	0.395215
Chr04	-0.497248
Chr04	0.238562
Chr04	0.102319
Chr04	0.221299
Chr04	-0.232415
Chr04	0.0202689
Chr04	0.613617
Chr04	-0.25768
Chr04	0.0198382
Chr04	-0.0313899
Chr04	0.75281
Chr04	0.725239
Chr04	-0.16968
Chr04	-0.26046
Chr04	0.172565
Chr04	0.451218
Chr04	-0.572597
Chr04	0.433046
Chr04	0.299056
Chr04	-0.134086
Chr04	0.33619
Chr04	0.118994
Chr04	0.876877
Chr04	-0.412972
Chr04	-0.00343448
Chr04	-0.280833
Chr04	-0.34977
Chr04	1.03825
Chr04	1.21819
Chr04	-1.5229
Chr04	1.05894
Chr04	1.01737
Chr04	0.113751
Chr04	-0.198574
Chr04	-0.725281
Chr04	-0.163836
Chr04	0.464002
Chr04	-0.0557293
Chr04	-0.146569
Chr04	-0.831157
Chr04	-0.134594
Chr04	-0.190639
Chr04	-0.231101
Chr04	0.0367538
Chr04	0.00842254
Chr04	-0.0405219
Chr04	-0.0723645
Chr04	-1.00228
Chr04	0.412475
Chr04	-0.152088
Chr04	1.10553
Chr04	-0.112997
Chr04	0.63766
Chr04	0.22928
Chr04	-0.242645
Chr04	-0.128096
Chr04	0.00639488
Chr04	-0.14783
Chr04	-1.31435
Chr04	0.0817644
Chr04	-0.0292833
Chr04	0.169076
Chr04	-0.345802
Chr04	-0.0423149
Chr04	-0.781361
Chr04	0.248747
Chr04	0.360782
Chr04	0.0139345
Chr04	0.00387271
Chr04	-0.286609
Chr04	0.21129
Chr04	0.380901
Chr04	0.126954
Chr04	-0.250759
Chr04	-0.280235
Chr04	-0.0165212
Chr04	0.236146
Chr04	0.0643334
Chr04	0.0517618
Chr04	0.144274
Chr04	-0.533638
Chr04	0.168789
Chr04	0.0930347
Chr04	0.239475
Chr04	-0.015079
Chr04	0.532919
Chr04	0.476433
Chr04	0.476433
Chr04	0.744829
Chr04	0.164432
Chr04	-0.126932
Chr04	0.436303
Chr04	0.0955111
Chr04	-0.0231001
Chr04	0.141936
Chr04	-0.472002
Chr04	-0.138756
Chr04	-0.138756
Chr04	0.131242
Chr04	-0.233589
Chr04	0.284703
Chr04	0.697442
Chr04	0.215875
Chr04	0.135417
Chr04	0.292263
Chr04	0.511235
Chr04	0.0214806
Chr04	0.0214806
Chr04	0.0214806
Chr04	0.293985
Chr04	0.847592
Chr04	-0.155116
Chr04	-0.641114
Chr04	0.299105
Chr04	0.806467
Chr04	0.101308
Chr04	-1.251
Chr04	-0.931753
Chr04	-0.155776
Chr04	0.14161
Chr04	0.0402153
Chr04	0.220632
Chr04	-0.0612339
Chr04	-0.104517
Chr04	0.632132
Chr04	-0.171191
Chr04	0.461447
Chr04	1.13095
Chr04	0.318399
Chr04	1.14215
Chr04	-0.317012
Chr04	0.438302
Chr04	-0.100361
Chr04	0.26258
Chr04	1.17149
Chr04	0.0279705
Chr04	-0.274241
Chr04	0.546757
Chr04	0.0390471
Chr04	0.602217
Chr04	0.131066
Chr04	-0.390198
Chr04	0.0620213
Chr04	-0.653453
Chr04	0.259191
Chr04	0.144839
Chr04	0.426459
Chr04	0.351113
Chr04	1.1072
Chr04	0.640805
Chr04	0.160497
Chr04	0.176392
Chr04	-0.296936
Chr04	0.57787
Chr04	0.57787
Chr04	0.0700994
Chr04	0.410325
Chr04	0.791795
Chr04	-0.21787
Chr04	0.261503
Chr04	0.114047
Chr04	-0.542101
Chr04	0.509684
Chr04	-0.507325
Chr04	0.328012
Chr04	-0.0635287
Chr04	-0.34516
Chr04	0.334123
Chr04	0.470005
Chr04	0.0592979
Chr04	0.0592979
Chr04	0.657945
Chr04	0.0230894
Chr04	-0.608031
Chr04	0.0505712
Chr04	0.177953
Chr04	-0.569378
Chr04	-0.140364
Chr04	0.3622
Chr04	0.630139
Chr04	-0.216409
Chr04	0.33103
Chr04	0.739134
Chr04	-1.28057
Chr04	-0.616958
Chr04	-0.383779
Chr04	0.0991747
Chr04	0.128654
Chr04	0.208646
Chr04	-0.0044756
Chr04	1.29842
Chr04	0.302226
Chr04	0.0653481
Chr04	0.214833
Chr04	-0.32758
Chr04	0.716119
Chr04	0.310316
Chr04	0.0542094
Chr04	0.0700176
Chr04	0.031722
Chr04	0.263162
Chr04	0.263162
Chr04	0.463279
Chr04	0.110745
Chr04	-0.238473
Chr04	-0.234429
Chr04	0.832022
Chr04	-0.413194
Chr04	-0.413194
Chr04	-0.413194
Chr04	-0.413194
Chr04	-0.413194
Chr04	-0.413194
Chr04	-1.10115
Chr04	0.00686863
Chr04	-0.373378
Chr04	-0.358447
Chr04	-0.957005
Chr04	0.158311
Chr04	-0.422884
Chr04	0.0677225
Chr04	0.175077
Chr04	-0.859098
Chr04	-0.0360754
Chr04	-0.0903598
Chr04	-0.193911
Chr04	0.464578
Chr04	0.464578
Chr04	-0.35514
Chr04	-0.35514
Chr04	-0.288592
Chr04	0.536433
Chr04	0.0874445
Chr04	-0.156785
Chr04	0.694764
Chr04	0.165519
Chr04	-0.207495
Chr04	0.106594
Chr04	-0.594134
Chr04	0.448578
Chr04	-0.487968
Chr04	-0.487968
Chr04	-0.0486565
Chr04	-0.274978
Chr04	-0.274978
Chr04	0.297597
Chr04	0.625066
Chr04	0.164692
Chr04	-0.0434588
Chr04	0.329875
Chr04	0.482067
Chr04	-0.0573802
Chr04	0.357073
Chr04	0.260558
Chr04	0.0266698
Chr04	0.288308
Chr04	0.456671
Chr04	-0.461485
Chr04	-0.223066
Chr04	0.49803
Chr04	-0.570301
Chr04	-0.0870768
Chr04	-0.586599
Chr04	0.5977
Chr04	0.136264
Chr04	-1.47894
Chr04	-1.47894
Chr04	0.78564
Chr04	0.78564
Chr04	0.524941
Chr04	0.287813
Chr04	-0.622241
Chr04	0.157615
Chr04	0.175549
Chr04	-0.399123
Chr04	-0.229173
Chr04	0.309085
Chr04	0.365627
Chr04	-0.626489
Chr04	-0.325915
Chr04	0.114379
Chr04	1.21427
Chr04	-0.663734
Chr04	0.193288
Chr04	0.0518584
Chr04	0.509895
Chr04	-0.399174
Chr04	-0.379513
Chr04	-0.404135
Chr04	0.507491
Chr04	0.427403
Chr04	0.590663
Chr04	0.318724
Chr04	0.560643
Chr04	0.687406
Chr04	0.224545
Chr04	-0.507837
Chr04	0.858171
Chr04	-0.0489761
Chr04	0.24859
Chr04	0.0394627
Chr04	-0.0261441
Chr04	0.161513
Chr04	0.0472761
Chr04	0.106692
Chr04	0.0749287
Chr04	0.163041
Chr04	-0.0115458
Chr04	0.232745
Chr04	1.21737
Chr04	0.0971346
Chr04	-0.103805
Chr04	-0.26917
Chr04	0.510733
Chr04	-0.722909
Chr04	-0.0486693
Chr04	0.725485
Chr04	0.185101
Chr04	0.0487839
Chr04	0.522542
Chr04	0.502863
Chr04	0.502863
Chr04	0.502863
Chr04	-0.136974
Chr04	0.570649
Chr04	0.485402
Chr04	-0.147236
Chr04	0.0554577
Chr04	0.0572608
Chr04	0.0691119
Chr04	0.120817
Chr04	0.124664
Chr04	-0.0547064
Chr04	-0.0819388
Chr04	0.436203
Chr04	0.502739
Chr04	1.21038
Chr04	-0.961234
Chr04	-0.961234
Chr04	0.208274
Chr04	0.823073
Chr04	-0.547337
Chr04	-0.152024
Chr04	0.361686
Chr04	-0.0471492
Chr04	0.378361
Chr04	0.378361
Chr04	-0.00561218
Chr04	0.182225
Chr04	-0.1457
Chr04	0.11338
Chr04	0.11338
Chr05	-0.0952253
Chr05	0.140754
Chr05	0.379053
Chr05	0.359425
Chr05	-0.0138769
Chr05	0.275064
Chr05	-0.0590434
Chr05	-0.467444
Chr05	-0.00620354
Chr05	-0.00210053
Chr05	1.55505
Chr05	0.0678622
Chr05	0.0597789
Chr05	-0.246155
Chr05	0.102969
Chr05	0.676288
Chr05	0.241192
Chr05	-0.372847
Chr05	0.0404752
Chr05	0.256786
Chr05	0.388675
Chr05	0.19621
Chr05	-0.946629
Chr05	0.149747
Chr05	-0.146863
Chr05	-0.0129444
Chr05	0.370647
Chr05	-0.362813
Chr05	0.38314
Chr05	0.253394
Chr05	0.420032
Chr05	0.18357
Chr05	-0.0665061
Chr05	0.302671
Chr05	-0.0217069
Chr05	0.0843542
Chr05	0.399078
Chr05	-0.209484
Chr05	0.454348
Chr05	-0.988928
Chr05	1.05837
Chr05	-1.11498
Chr05	-0.030858
Chr05	-1.28847
Chr05	0.243479
Chr05	0.244621
Chr05	1.43652
Chr05	-0.0415752
Chr05	-0.183449
Chr05	0.6527
Chr05	0.224929
Chr05	0.75394
Chr05	0.0772383
Chr05	-0.254421
Chr05	-0.204048
Chr05	-0.148827
Chr05	-0.252539
Chr05	-0.0995415
Chr05	-0.0429157
Chr05	0.0043747
Chr05	0.198409
Chr05	0.45219
Chr05	-0.141117
Chr05	0.890109
Chr05	0.797405
Chr05	0.797405
Chr05	-0.0139519
Chr05	0.00451092
Chr05	0.468544
Chr05	-0.432948
Chr05	0.480532
Chr05	0.0923158
Chr05	0.25125
Chr05	-0.716784
Chr05	-0.457794
Chr05	0.12869
Chr05	-0.385975
Chr05	-0.0192406
Chr05	-0.707995
Chr05	-0.664282
Chr05	-0.634513
Chr05	-0.788808
Chr05	-0.380643
Chr05	-0.316307
Chr05	-0.319135
Chr05	-0.373167
Chr05	0.714821
Chr05	-0.025087
Chr05	0.487093
Chr05	0.362269
Chr05	-0.994872
Chr05	-0.148782
Chr05	-0.0192898
Chr05	-0.0457075
Chr05	0.190796
Chr05	-0.00373908
Chr05	-0.0380737
Chr05	0.464607
Chr05	0.445703
Chr05	0.236242
Chr05	0.594698
Chr05	-0.109953
Chr05	0.166143
Chr05	-0.147413
Chr05	0.200974
Chr05	-0.139401
Chr05	0.208555
Chr05	0.208555
Chr05	0.0203734
Chr05	0.0203734
Chr05	0.0203734
Chr05	0.00505927
Chr05	0.423984
Chr05	-0.0281255
Chr05	-0.507941
Chr05	0.259221
Chr05	0.209896
Chr05	0.0221568
Chr05	0.180216
Chr05	0.365393
Chr05	0.0781504
Chr05	-0.0869728
Chr05	-0.0779907
Chr05	0.391753
Chr05	0.590557
Chr05	0.147982
Chr05	0.210969
Chr05	0.205243
Chr05	-0.305668
Chr05	0.122404
Chr05	0.122404
Chr05	-0.0787074
Chr05	0.0412902
Chr05	0.461367
Chr05	-0.13976
Chr05	0.0335618
Chr05	0.0335618
Chr05	0.299531
Chr05	0.299531
Chr05	0.301593
Chr05	-0.00864526
Chr05	-0.727197
Chr05	-0.937443
Chr05	-0.937443
Chr05	-0.824682
Chr05	0.661085
Chr05	0.126538
Chr05	-0.0676783
Chr05	0.127739
Chr05	0.440027
Chr05	-0.121636
Chr05	-0.434975
Chr05	0.133258
Chr05	-0.0270645
Chr05	0.380203
Chr05	0.160891
Chr05	0.0354317
Chr05	0.45332
Chr05	0.0984899
Chr05	-0.207553
Chr05	-0.947299
Chr05	0.428045
Chr05	0.447887
Chr05	-0.237085
Chr05	0.653365
Chr05	0.937813
Chr05	0.479871
Chr05	0.479871
Chr05	-0.000833701
Chr05	-0.254879
Chr05	-0.12359
Chr05	0.834802
Chr05	0.320436
Chr05	0.336576
Chr05	0.124449
Chr05	0.162377
Chr05	0.282151
Chr05	-0.936839
Chr05	0.139372
Chr05	1.1524
Chr05	0.148116
Chr05	-0.393676
Chr05	0.248248
Chr05	0.283595
Chr05	0.162252
Chr05	-0.246368
Chr05	-0.592538
Chr05	-0.855969
Chr05	0.316167
Chr05	0.191165
Chr05	-0.411917
Chr05	0.161973
Chr05	0.832296
Chr05	0.501699
Chr05	0.282547
Chr05	-0.377531
Chr05	0.0776089
Chr05	0.0186419
Chr05	0.928843
Chr05	0.0359776
Chr05	0.198807
Chr05	0.198807
Chr05	0.119689
Chr05	-0.228438
Chr05	0.376034
Chr05	0.0777364
Chr05	0.340599
Chr05	-0.46505
Chr05	-1.00248
Chr05	-0.601597
Chr05	-0.142464
Chr05	-0.413124
Chr05	-0.463193
Chr05	-0.286893
Chr05	0.524859
Chr05	0.0616336
Chr05	-0.133311
Chr05	-0.0769448
Chr05	-0.0769448
Chr05	0.309108
Chr05	-0.0225116
Chr05	-0.0358441
Chr05	0.322432
Chr05	0.322432
Chr05	0.165274
Chr05	0.165274
Chr05	-0.130793
Chr05	-0.487778
Chr05	0.223259
Chr05	0.362847
Chr05	0.169126
Chr05	0.284106
Chr05	-0.272044
Chr05	0.186604
Chr05	0.64725
Chr05	0.316319
Chr05	-0.683852
Chr05	0.346211
Chr05	-0.395314
Chr05	-0.488061
Chr05	-0.014348
Chr05	0.12387
Chr05	-0.295525
Chr05	0.0395774
Chr05	0.0775843
Chr05	-0.0122702
Chr05	0.369235
Chr05	0.0593633
Chr05	0.0913788
Chr05	-0.174249
Chr05	-0.22314
Chr05	-0.03238
Chr05	-0.627521
Chr05	0.10663
Chr05	-0.113676
Chr05	-0.113676
Chr05	0.0215203
Chr05	0.0903895
Chr05	-0.206456
Chr05	-0.235696
Chr05	-0.235696
Chr05	-0.672861
Chr05	-0.0485212
Chr05	-0.0485212
Chr05	0.31456
Chr05	0.21286
Chr05	0.21286
Chr05	0.207766
Chr05	-0.245012
Chr05	0.0723582
Chr05	-0.171699
Chr05	0.653965
Chr05	0.945661
Chr05	-0.206084
Chr05	0.187755
Chr05	-0.188094
Chr05	0.48695
Chr05	0.457234
Chr05	-0.62457
Chr05	-0.209691
Chr05	-0.0464808
Chr05	0.158988
Chr05	-0.186898
Chr05	0.160577
Chr05	-1.2546
Chr05	0.408063
Chr05	-0.138523
Chr05	-0.138523
Chr05	0.38423
Chr05	-0.0827248
Chr05	0.566117
Chr05	0.54596
Chr05	1.97859
Chr05	1.71148
Chr05	0.0446179
Chr05	-0.122688
Chr05	0.43122
Chr05	0.272468
Chr05	0.163536
Chr05	-0.0282435
Chr05	0.87244
Chr05	-0.258312
Chr05	0.721726
Chr05	0.157743
Chr05	0.304496
Chr05	-0.384267
Chr05	0.104659
Chr05	0.233512
Chr05	0.370003
Chr05	0.388915
Chr05	0.411928
Chr05	0.500154
Chr05	0.052457
Chr05	-0.0850472
Chr05	-0.360453
Chr05	0.074456
Chr05	0.167646
Chr05	0.602447
Chr05	-0.341536
Chr05	-0.840146
Chr05	-0.52762
Chr05	-0.726603
Chr05	0.166932
Chr05	0.574792
Chr05	0.0349563
Chr05	0.584447
Chr05	0.0211664
Chr05	0.171938
Chr05	0.171938
Chr05	-0.351432
Chr05	0.0253855
Chr05	-0.0659416
Chr05	0.269261
Chr05	-0.0118506
Chr05	0.425424
Chr05	0.5171
Chr05	0.0828174
Chr05	0.0868045
Chr05	-0.0476354
Chr05	0.343214
Chr05	-0.401781
Chr05	-0.18476
Chr05	0.32304
Chr05	0.112216
Chr05	-0.112745
Chr05	0.343912
Chr05	0.0444436
Chr05	-0.238008
Chr05	0.232683
Chr05	0.492574
Chr05	-0.0374979
Chr05	0.151825
Chr05	0.504093
Chr05	0.398806
Chr05	0.398806
Chr05	-1.04432
Chr05	-0.0328414
Chr05	0.0458009
Chr05	-0.238541
Chr05	0.127021
Chr05	0.496608
Chr05	-0.333818
Chr05	-0.763874
Chr05	0.112722
Chr05	-0.500772
Chr05	-0.410027
Chr05	0.224665
Chr05	-0.0249341
Chr05	0.0802858
Chr05	0.323949
Chr05	0.18508
Chr05	0.357118
Chr05	0.419445
Chr05	-0.310643
Chr05	-0.293812
Chr05	-0.668079
Chr05	0.284815
Chr05	-0.274823
Chr05	0.192815
Chr05	0.297495
Chr05	0.296735
Chr05	-0.171805
Chr05	0.0122879
Chr05	-0.334188
Chr05	-0.409212
Chr05	-0.0324092
Chr05	0.23087
Chr05	-0.418766
Chr05	-0.548353
Chr05	-0.151445
Chr05	0.699067
Chr05	0.178177
Chr05	1.30822
Chr05	-0.0863804
Chr05	0.297563
Chr05	-0.0282469
Chr05	-0.151944
Chr05	-0.151944
Chr05	0.1844
Chr05	0.1844
Chr05	-0.0260291
Chr05	-0.0260291
Chr05	-0.380245
Chr05	0.317017
Chr05	0.0831623
Chr05	-0.201278
Chr05	0.0867251
Chr05	0.484506
Chr05	0.611743
Chr05	-0.450885
Chr05	-0.548447
Chr05	-0.44714
Chr05	-0.112278
Chr05	-0.112278
Chr05	0.188631
Chr05	0.0598684
Chr05	-0.298066
Chr05	-0.346102
Chr05	-0.201927
Chr05	-1.35607
Chr05	-0.244689
Chr05	-0.185679
Chr05	-0.224464
Chr05	-0.372908
Chr05	-0.791786
Chr05	0.026988
Chr05	0.12755
Chr05	-0.590581
Chr05	-0.149057
Chr05	-0.300615
Chr05	-0.460848
Chr05	-0.460848
Chr05	0.236108
Chr05	-0.522132
Chr05	0.120117
Chr05	0.195031
Chr05	-0.874964
Chr05	-0.0145512
Chr05	0.285528
Chr05	-0.0662778
Chr05	-0.123009
Chr05	0.413001
Chr05	0.047121
Chr05	0.367081
Chr05	-0.568227
Chr05	0.227072
Chr05	0.227072
Chr05	-0.252872
Chr05	0.471094
Chr05	0.0728858
Chr05	-0.137206
Chr05	0.132114
Chr05	0.00931059
Chr05	-0.0477273
Chr05	0.10327
Chr05	0.00891332
Chr05	-0.446729
Chr05	-0.446729
Chr05	0.504985
Chr05	-0.0347466
Chr05	1.23686
Chr05	0.601285
Chr05	0.309968
Chr05	-0.76848
Chr05	0.0776767
Chr05	0.095451
Chr05	-0.783281
Chr05	0.122306
Chr05	0.0384015
Chr05	-0.0242395
Chr05	-0.0810201
Chr05	0.32246
Chr05	0.118745
Chr05	0.0385409
Chr05	0.0385409
Chr05	-0.115619
Chr05	-0.141909
Chr05	0.78025
Chr05	0.235068
Chr05	0.344816
Chr05	0.189543
Chr05	-0.492719
Chr05	-0.384657
Chr05	0.000636903
Chr05	-0.0342078
Chr05	-0.473355
Chr05	-0.128461
Chr05	-0.117731
Chr05	0.142418
Chr05	0.398204
Chr05	-0.177057
Chr05	0.28581
Chr05	-0.850028
Chr05	0.134338
Chr05	0.131604
Chr05	-0.161756
Chr05	0.230195
Chr05	0.115577
Chr05	0.150414
Chr05	0.292827
Chr05	0.0298967
Chr05	0.00525305
Chr05	0.00525305
Chr05	0.00525305
Chr05	0.00525305
Chr05	0.00525305
Chr05	0.00525305
Chr05	0.00525305
Chr05	0.00525305
Chr05	-0.840695
Chr05	-0.840695
Chr05	-0.840695
Chr05	-0.840695
Chr05	-0.840695
Chr05	-0.840695
Chr05	-0.840695
Chr05	-0.840695
Chr05	0.0295381
Chr05	0.0295381
Chr05	0.0295381
Chr05	0.0295381
Chr05	0.0295381
Chr05	0.0295381
Chr05	0.0295381
Chr05	0.0295381
Chr05	-0.856546
Chr05	-0.856546
Chr05	-0.856546
Chr05	-0.856546
Chr05	-0.856546
Chr05	-0.856546
Chr05	-0.856546
Chr05	-0.856546
Chr06	0.272467
Chr06	-0.644513
Chr06	-0.442743
Chr06	0.966616
Chr06	0.0446598
Chr06	0.334364
Chr06	0.377033
Chr06	-0.754123
Chr06	0.495572
Chr06	-0.937601
Chr06	-1.11979
Chr06	-0.0443138
Chr06	0.20186
Chr06	0.838986
Chr06	-0.048405
Chr06	0.0539691
Chr06	-0.149885
Chr06	0.289195
Chr06	0.11363
Chr06	0.259141
Chr06	0.158277
Chr06	0.0676141
Chr06	0.167952
Chr06	0.440133
Chr06	-0.75411
Chr06	0.130106
Chr06	0.157046
Chr06	0.331254
Chr06	-0.373182
Chr06	-0.373182
Chr06	-0.373182
Chr06	-0.373182
Chr06	-0.379475
Chr06	-0.379475
Chr06	-0.379475
Chr06	0.0093735
Chr06	0.885418
Chr06	0.462998
Chr06	0.0587906
Chr06	0.108396
Chr06	-0.319418
Chr06	0.801104
Chr06	0.553104
Chr06	-0.0392258
Chr06	0.0281065
Chr06	0.250437
Chr06	-0.127275
Chr06	0.117488
Chr06	0.578576
Chr06	0.221521
Chr06	-0.539828
Chr06	0.264444
Chr06	0.693614
Chr06	1.30351
Chr06	-0.0205788
Chr06	0.347055
Chr06	0.518327
Chr06	0.15405
Chr06	-0.173885
Chr06	0.397419
Chr06	0.121396
Chr06	-0.0529566
Chr06	-0.160554
Chr06	0.185978
Chr06	-0.0548412
Chr06	-0.0665842
Chr06	0.369034
Chr06	-0.728801
Chr06	0.0866455
Chr06	-0.0862387
Chr06	0.115988
Chr06	0.110291
Chr06	0.26237
Chr06	-0.610164
Chr06	0.0861732
Chr06	0.249238
Chr06	0.464413
Chr06	0.156766
Chr06	-0.172772
Chr06	-0.105015
Chr06	-0.105015
Chr06	-0.105015
Chr06	-0.396509
Chr06	-0.396509
Chr06	0.344889
Chr06	0.0796791
Chr06	0.328193
Chr06	0.390313
Chr06	0.256466
Chr06	0.226469
Chr06	-0.0275884
Chr06	0.0768228
Chr06	0.137582
Chr06	0.0877948
Chr06	0.0293182
Chr06	0.7325
Chr06	-0.0161753
Chr06	0.221656
Chr06	0.000167845
Chr06	0.146672
Chr06	0.263716
Chr06	0.232622
Chr06	-0.109645
Chr06	-0.0117048
Chr06	0.732575
Chr06	-0.272488
Chr06	0.631631
Chr06	-0.107167
Chr06	-0.0230574
Chr06	-0.0524416
Chr06	-0.483583
Chr06	-0.425873
Chr06	0.607935
Chr06	0.591756
Chr06	0.946677
Chr06	-1.06468
Chr06	-0.521535
Chr06	1.01525
Chr06	0.0304527
Chr06	0.41389
Chr06	-0.038453
Chr06	0.229034
Chr06	-0.708183
Chr06	0.241266
Chr06	0.0461222
Chr06	0.0856301
Chr06	-0.377636
Chr06	-0.161188
Chr06	0.429451
Chr06	0.261574
Chr06	0.185019
Chr06	1.42782
Chr06	-0.114031
Chr06	-0.209859
Chr06	0.162674
Chr06	0.241749
Chr06	0.241749
Chr06	0.565777
Chr06	0.294569
Chr06	0.0171716
Chr06	1.61063
Chr06	0.731345
Chr06	-0.840098
Chr06	0.179801
Chr06	0.275355
Chr06	0.275355
Chr06	0.287411
Chr06	0.287411
Chr06	-0.14746
Chr06	0.0806159
Chr06	-0.293306
Chr06	0.127575
Chr06	0.127575
Chr06	0.339877
Chr06	-0.0218969
Chr06	0.61213
Chr06	0.360683
Chr06	-0.248635
Chr06	1.26495
Chr06	0.127658
Chr06	0.67301
Chr06	-0.580341
Chr06	-0.50207
Chr06	0.540287
Chr06	-0.18276
Chr06	-0.18276
Chr06	0.751572
[truncated: 8,064 more rows]
