# Supplementary material for: Prophage-encoded Hm-oscar gene recapitulates Wolbachia-induced male-killing in the tea tortrix moth Homona magnanima
Source: eLife. 2025 Apr 14;13:RP101101. doi: 10.7554/eLife.101101 (PMC11996169; doi:10.7554/eLife.101101)
Supplement: Figure 3—source data 6. [file elife-101101-fig3-data6.xlsx]

## Sheet: Steel.Dwass Fig.3c-Wol
	comparison	t.value	p.value		Label	Comparison	Chr01	Chr02	Chr03	Chr04	Chr05	Chr06	Chr07	Chr08	Chr09	Chr10	Chr11	Chr12	Chr13	Chr14	Chr15	Chr16	Chr17	Chr18	Chr19	Chr20	Chr21	Chr22	Chr23	Chr24	Chr25	Chr26	Chr27	Chr28
1	Chr01:Chr02	8.97989	1.9118e-13		BDE	Chr01	NA	No	No	No	No	No	No	No	No	Yes	No	No	No	No	No	No	No	No	Yes	No	No	No	No	No	Yes	No	No	No
2	Chr01:Chr03	9.23693	3.05866e-13		ABD	Chr02	No	NA	No	No	No	No	No	No	No	No	No	No	No	No	No	No	No	No	No	No	No	No	No	No	No	No	No	No
3	Chr01:Chr04	8.73441	2.27818e-13		BDE	Chr03	No	No	NA	No	No	No	No	No	No	Yes	No	No	No	No	No	No	No	No	Yes	No	No	No	No	No	Yes	No	No	No
4	Chr01:Chr05	11.6261	0		DFGH	Chr04	No	No	No	NA	No	No	No	Yes	No	Yes	No	No	No	Yes	No	No	No	No	Yes	No	Yes	No	No	No	No	No	Yes	No
5	Chr01:Chr06	7.54416	1.73672e-11		DE	Chr05	No	No	No	No	NA	No	No	No	No	Yes	No	No	No	Yes	No	No	No	No	Yes	No	No	No	No	No	Yes	No	No	No
6	Chr01:Chr07	10.0782	3.04423e-13		BDI	Chr06	No	No	No	No	No	NA	No	No	No	Yes	No	No	No	No	No	No	No	No	Yes	No	No	No	No	No	No	No	No	No
7	Chr01:Chr08	10.349	2.64455e-13		ADK	Chr07	No	No	No	No	No	No	NA	Yes	No	No	No	No	No	Yes	No	No	No	No	No	No	Yes	No	No	No	No	No	No	No
8	Chr01:Chr09	13.1609	0		BEJ	Chr08	No	No	No	Yes	No	No	Yes	NA	No	Yes	No	No	No	No	No	No	No	No	Yes	No	No	No	No	No	Yes	No	No	No
9	Chr01:Chr10	9.36675	2.67009e-13		DFIJ	Chr09	No	No	No	No	No	No	No	No	NA	Yes	No	No	No	Yes	No	No	No	No	Yes	No	Yes	No	No	No	No	No	No	No
10	Chr01:Chr11	10.8927	2.75335e-13		A	Chr10	Yes	No	Yes	Yes	Yes	Yes	No	Yes	Yes	NA	Yes	Yes	Yes	Yes	Yes	Yes	Yes	Yes	No	Yes	Yes	Yes	Yes	Yes	No	Yes	Yes	No
11	Chr01:Chr12	9.47383	2.44249e-13		DE	Chr11	No	No	No	No	No	No	No	No	No	Yes	NA	No	No	Yes	No	No	No	No	Yes	No	No	No	No	No	Yes	No	No	No
12	Chr01:Chr13	8.03715	7.11542e-13		DFIJ	Chr12	No	No	No	No	No	No	No	No	No	Yes	No	NA	No	Yes	No	No	No	No	Yes	No	Yes	No	No	No	No	No	No	No
13	Chr01:Chr14	9.44426	2.50688e-13		DEI	Chr13	No	No	No	No	No	No	No	No	No	Yes	No	No	NA	Yes	No	No	No	No	Yes	No	No	No	No	No	No	No	No	No
14	Chr01:Chr15	0.619355	1		B	Chr14	No	No	No	Yes	Yes	No	Yes	No	Yes	Yes	Yes	Yes	Yes	NA	No	No	Yes	No	Yes	No	No	Yes	Yes	Yes	Yes	No	No	No
15	Chr01:Chr16	8.85507	2.04392e-13		BDE	Chr15	No	No	No	No	No	No	No	No	No	Yes	No	No	No	No	NA	No	No	No	Yes	No	No	No	No	No	Yes	No	No	No
16	Chr01:Chr17	9.74776	3.14859e-13		BDE	Chr16	No	No	No	No	No	No	No	No	No	Yes	No	No	No	No	No	NA	No	No	Yes	No	No	No	No	No	Yes	No	No	No
17	Chr01:Chr18	9.18143	3.26961e-13		CDE	Chr17	No	No	No	No	No	No	No	No	No	Yes	No	No	No	Yes	No	No	NA	No	No	No	No	No	No	No	No	No	No	No
18	Chr01:Chr19	4.09933	0.0121508		BDI	Chr18	No	No	No	No	No	No	No	No	No	Yes	No	No	No	No	No	No	No	NA	Yes	No	No	No	No	No	No	No	No	No
19	Chr01:Chr20	8.16477	4.51306e-13		AC	Chr19	Yes	No	Yes	Yes	Yes	Yes	No	Yes	Yes	No	Yes	Yes	Yes	Yes	Yes	Yes	No	Yes	NA	Yes	Yes	No	No	Yes	No	Yes	Yes	No
20	Chr01:Chr21	8.85856	2.09166e-13		BDE	Chr20	No	No	No	No	No	No	No	No	No	Yes	No	No	No	No	No	No	No	No	Yes	NA	No	No	No	No	Yes	No	No	No
21	Chr01:Chr22	6.42032	5.12045e-08		BE	Chr21	No	No	No	Yes	No	No	Yes	No	Yes	Yes	No	Yes	No	No	No	No	No	No	Yes	No	NA	No	No	Yes	Yes	No	No	No
22	Chr01:Chr23	10.5125	2.78999e-13		CDE	Chr22	No	No	No	No	No	No	No	No	No	Yes	No	No	No	Yes	No	No	No	No	No	No	No	NA	No	No	No	No	No	No
23	Chr01:Chr24	9.19654	3.21965e-13		CDE	Chr23	No	No	No	No	No	No	No	No	No	Yes	No	No	No	Yes	No	No	No	No	No	No	No	No	NA	No	No	No	No	No
24	Chr01:Chr25	12.362	0		DFIJ	Chr24	No	No	No	No	No	No	No	No	No	Yes	No	No	No	Yes	No	No	No	No	Yes	No	Yes	No	No	NA	No	No	No	No
25	Chr01:Chr26	6.9888	1.04707e-09		ACFI	Chr25	Yes	No	Yes	No	Yes	No	No	Yes	No	No	Yes	No	No	Yes	Yes	Yes	No	No	No	Yes	Yes	No	No	No	NA	No	Yes	No
26	Chr01:Chr27	14.2732	0		BDI	Chr26	No	No	No	No	No	No	No	No	No	Yes	No	No	No	No	No	No	No	No	Yes	No	No	No	No	No	No	NA	No	No
27	Chr01:Chr28	4.95128	0.000260435		BEJK	Chr27	No	No	No	Yes	No	No	No	No	No	Yes	No	No	No	No	No	No	No	No	Yes	No	No	No	No	No	Yes	No	NA	No
28	Chr02:Chr15	9.30474	2.90101e-13		ABD	Chr28	No	No	No	No	No	No	No	No	No	No	No	No	No	No	No	No	No	No	No	No	No	No	No	No	No	No	No	NA
29	Chr03:Chr15	10.087	3.0298e-13
30	Chr04:Chr15	9.77498	3.00204e-13
31	Chr05:Chr15	12.9015	0
32	Chr06:Chr15	8.2047	4.10116e-13
33	Chr07:Chr15	10.8437	2.56239e-13
34	Chr08:Chr15	11.3442	0
35	Chr09:Chr15	14.2231	0
36	Chr10:Chr15	10.8871	2.83551e-13
37	Chr11:Chr15	12.2319	0
38	Chr12:Chr15	10.3625	2.55906e-13
39	Chr13:Chr15	8.92092	1.98508e-13
40	Chr14:Chr15	9.83407	2.80775e-13
41	Chr15:Chr16	9.50933	2.3237e-13
42	Chr15:Chr17	10.7718	2.85327e-13
43	Chr15:Chr18	9.80389	2.92988e-13
44	Chr15:Chr19	4.9988	0.000204848
45	Chr15:Chr20	8.58453	2.55351e-13
46	Chr15:Chr21	10.159	2.66787e-13
47	Chr15:Chr22	7.18709	2.50178e-10
48	Chr15:Chr23	11.4028	0
49	Chr15:Chr24	9.87395	2.64788e-13
50	Chr15:Chr25	13.6518	0
51	Chr15:Chr26	7.40078	5.13206e-11
52	Chr15:Chr27	15.226	0
53	Chr15:Chr28	5.18739	7.70639e-05
54	Chr04:Chr27	11.4902	0
55	Chr10:Chr27	13.1695	0
56	Chr11:Chr27	11.5273	0
57	Chr19:Chr27	13.0397	0
58	Chr21:Chr27	12.7752	0
59	Chr13:Chr27	11.286	4.35207e-14
60	Chr25:Chr27	11.2302	5.59552e-14
61	Chr17:Chr27	11.0399	1.67866e-13
62	Chr22:Chr27	11.0254	1.803e-13
63	Chr06:Chr27	10.2539	2.25153e-13
64	Chr08:Chr27	9.47369	2.41696e-13
65	Chr05:Chr27	10.3683	2.51799e-13
66	Chr12:Chr27	10.6249	2.53464e-13
67	Chr24:Chr27	10.5513	2.54907e-13
68	Chr18:Chr27	10.322	2.75446e-13
69	Chr07:Chr27	9.34052	2.76001e-13
70	Chr09:Chr27	8.46739	2.77778e-13
71	Chr03:Chr27	10.7256	2.83329e-13
72	Chr16:Chr27	9.81954	2.85216e-13
73	Chr20:Chr27	9.24708	3.05644e-13
74	Chr23:Chr27	10.056	3.17413e-13
75	Chr27:Chr28	9.04718	3.74145e-13
76	Chr26:Chr27	8.07874	6.01075e-13
77	Chr14:Chr27	7.46325	3.20638e-11
78	Chr02:Chr27	6.23036	1.74884e-07
79	Chr02:Chr19	6.2244	1.81646e-07
80	Chr03:Chr19	4.45532	0.00272489
81	Chr04:Chr19	4.18174	0.00872714
82	Chr05:Chr19	6.78884	4.2659e-09
83	Chr07:Chr19	5.56169	9.8732e-06
84	Chr08:Chr19	6.09548	4.0925e-07
85	Chr09:Chr19	8.61911	2.48579e-13
86	Chr10:Chr19	3.94517	0.0219917
87	Chr11:Chr19	5.85525	1.7776e-06
88	Chr12:Chr19	4.55029	0.00177861
89	Chr14:Chr19	5.52381	1.22379e-05
90	Chr16:Chr19	4.64302	0.00116015
91	Chr17:Chr19	5.00026	0.000203334
92	Chr18:Chr19	4.56501	0.00166317
93	Chr19:Chr20	4.09891	0.0121706
94	Chr19:Chr21	4.26372	0.00622148
95	Chr19:Chr23	6.02688	6.26208e-07
96	Chr19:Chr24	4.80946	0.000525037
97	Chr19:Chr25	7.37495	6.22842e-11
98	Chr06:Chr19	3.47729	0.106364
99	Chr19:Chr26	3.42659	0.123409
100	Chr13:Chr19	3.30334	0.173685
101	Chr19:Chr22	2.1602	0.931319
102	Chr19:Chr28	1.45868	0.999772
103	Chr09:Chr10	7.54967	1.66571e-11
104	Chr09:Chr22	6.35062	8.07001e-08
105	Chr09:Chr21	6.3284	9.31965e-08
106	Chr09:Chr13	5.93382	1.10667e-06
107	Chr04:Chr09	5.36294	2.99511e-05
108	Chr09:Chr17	4.73514	0.000751136
109	Chr09:Chr12	4.64554	0.00114662
110	Chr06:Chr09	4.54761	0.00180043
111	Chr09:Chr28	4.62861	0.00124065
112	Chr09:Chr11	4.47024	0.00255018
113	Chr03:Chr09	4.34219	0.00446215
114	Chr09:Chr18	3.8092	0.0360457
115	Chr09:Chr24	3.48248	0.104729
116	Chr09:Chr16	3.32047	0.165912
117	Chr09:Chr26	3.09223	0.291274
118	Chr09:Chr20	3.08981	0.292849
119	Chr05:Chr09	3.03578	0.329364
120	Chr07:Chr09	2.83349	0.483826
121	Chr09:Chr25	2.65792	0.628192
122	Chr09:Chr23	2.6094	0.667178
123	Chr08:Chr09	2.44044	0.791193
124	Chr09:Chr14	1.06533	1
125	Chr02:Chr09	0.355084	1
126	Chr10:Chr25	5.53931	1.12105e-05
127	Chr02:Chr10	5.10001	0.000121818
128	Chr05:Chr10	4.51235	0.00211191
129	Chr10:Chr14	4.31042	0.00511001
130	Chr10:Chr23	4.10301	0.0119749
131	Chr08:Chr10	4.04261	0.0151749
132	Chr07:Chr10	3.52629	0.0917279
133	Chr10:Chr11	3.14385	0.25881
134	Chr10:Chr24	2.87221	0.452594
135	Chr10:Chr16	2.78151	0.526432
136	Chr10:Chr18	2.64471	0.638897
137	Chr10:Chr20	2.24835	0.897334
138	Chr03:Chr10	2.18395	0.923062
139	Chr10:Chr17	2.13083	0.940642
140	Chr10:Chr12	2.08963	0.952141
141	Chr04:Chr10	1.27386	0.999983
142	Chr10:Chr21	1.09529	0.999999
143	Chr06:Chr10	1.04258	1
144	Chr10:Chr22	0.731798	1
145	Chr10:Chr13	0.13895	1
146	Chr10:Chr28	0.233736	1
147	Chr10:Chr26	1.55081	0.999329
148	Chr02:Chr13	4.33889	0.00452579
149	Chr02:Chr21	4.30279	0.00527798
150	Chr02:Chr28	3.94137	0.0223054
151	Chr02:Chr04	3.74252	0.0454531
152	Chr02:Chr12	3.51437	0.0951289
153	Chr02:Chr06	3.47308	0.107701
154	Chr02:Chr03	3.22242	0.213982
155	Chr02:Chr05	2.25274	0.8954
156	Chr02:Chr07	2.2659	0.889455
157	Chr02:Chr08	1.96937	0.976353
158	Chr02:Chr11	3.17127	0.242529
159	Chr02:Chr14	1.2247	0.999992
160	Chr02:Chr16	2.69632	0.596772
161	Chr02:Chr17	3.34779	0.154052
162	Chr02:Chr18	3.23806	0.205728
163	Chr02:Chr20	2.697	0.596218
164	Chr02:Chr23	2.17489	0.926291
165	Chr02:Chr24	2.96196	0.382884
166	Chr02:Chr25	2.34679	0.848322
167	Chr02:Chr26	2.53331	0.725769
168	Chr22:Chr25	4.70358	0.000872755
169	Chr02:Chr22	4.43252	0.00301362
170	Chr05:Chr22	4.1447	0.0101387
171	Chr14:Chr22	3.98519	0.0189146
172	Chr08:Chr22	3.80009	0.0372207
173	Chr22:Chr23	3.79614	0.0377413
174	Chr07:Chr22	3.44682	0.116368
175	Chr03:Chr22	2.36823	0.836117
176	Chr04:Chr22	1.65465	0.998041
177	Chr06:Chr22	1.4187	0.999863
178	Chr11:Chr22	3.08585	0.295447
179	Chr12:Chr22	2.302	0.872077
180	Chr13:Chr22	0.953499	1
181	Chr16:Chr22	2.57099	0.697218
182	Chr17:Chr22	2.38371	0.826969
183	Chr18:Chr22	2.53904	0.721497
184	Chr20:Chr22	2.37475	0.832298
185	Chr21:Chr22	1.23156	0.999991
186	Chr22:Chr24	2.7227	0.575026
187	Chr22:Chr26	1.75564	0.995112
188	Chr22:Chr28	0.0868186	1
189	Chr21:Chr25	4.17315	0.00903717
190	Chr13:Chr25	4.07242	0.0135095
191	Chr03:Chr25	2.2534	0.895103
192	Chr04:Chr25	3.26746	0.190818
193	Chr05:Chr25	0.595097	1
194	Chr06:Chr25	2.65477	0.630752
195	Chr07:Chr25	0.714367	1
196	Chr08:Chr25	0.132228	1
197	Chr11:Chr25	2.06243	0.958777
198	Chr12:Chr25	2.67715	0.612505
199	Chr14:Chr25	0.878875	1
200	Chr16:Chr25	1.27261	0.999983
201	Chr17:Chr25	2.59946	0.675027
202	Chr18:Chr25	1.82565	0.991387
203	Chr20:Chr25	1.24253	0.99999
204	Chr23:Chr25	0.233399	1
205	Chr24:Chr25	1.28475	0.99998
206	Chr25:Chr26	1.46002	0.999768
207	Chr25:Chr28	3.25211	0.198505
208	Chr03:Chr04	0.82617	1
209	Chr03:Chr05	1.73841	0.995783
210	Chr03:Chr06	0.653499	1
211	Chr03:Chr07	1.29815	0.999975
212	Chr03:Chr08	1.76009	0.994925
213	Chr03:Chr11	0.520013	1
214	Chr03:Chr12	0.192191	1
215	Chr03:Chr13	1.46332	0.999758
216	Chr03:Chr14	2.30397	0.871079
217	Chr03:Chr16	0.571866	1
218	Chr03:Chr17	0.140539	1
219	Chr03:Chr18	0.310837	1
220	Chr03:Chr20	0.51146	1
221	Chr03:Chr21	1.4003	0.999892
222	Chr03:Chr23	1.67884	0.997534
223	Chr03:Chr24	0.640502	1
224	Chr03:Chr26	0.166742	1
225	Chr03:Chr28	1.63651	0.998359
226	Chr04:Chr05	2.79442	0.515801
227	Chr04:Chr06	0.0027118	1
228	Chr04:Chr07	2.12815	0.941444
229	Chr04:Chr08	2.50814	0.744252
230	Chr04:Chr11	1.42676	0.999847
231	Chr04:Chr12	0.669649	1
232	Chr04:Chr13	0.747098	1
233	Chr04:Chr14	2.97125	0.375934
234	Chr04:Chr16	1.27756	0.999982
235	Chr04:Chr17	0.77863	1
236	Chr04:Chr18	1.06329	1
237	Chr04:Chr20	1.05651	1
238	Chr04:Chr21	0.606479	1
239	Chr04:Chr23	2.53691	0.723085
240	Chr04:Chr24	1.29239	0.999977
241	Chr04:Chr26	0.719346	1
242	Chr04:Chr28	1.10199	0.999999
243	Chr05:Chr06	2.26383	0.890403
244	Chr05:Chr07	0.282756	1
245	Chr05:Chr08	0.117218	1
246	Chr05:Chr11	1.43274	0.999835
247	Chr05:Chr12	1.93988	0.980475
248	Chr05:Chr13	3.40992	0.129461
249	Chr05:Chr14	1.1149	0.999999
250	Chr05:Chr16	0.936218	1
251	Chr05:Chr17	2.01477	0.968708
252	Chr05:Chr18	1.18337	0.999996
253	Chr05:Chr20	0.971783	1
254	Chr05:Chr21	3.50228	0.0986791
255	Chr05:Chr23	0.0595055	1
256	Chr05:Chr24	0.967777	1
257	Chr05:Chr26	1.12734	0.999999
258	Chr05:Chr28	2.87806	0.44792
259	Chr06:Chr07	1.81996	0.991759
260	Chr06:Chr08	2.16063	0.931175
261	Chr06:Chr11	1.15278	0.999998
262	Chr06:Chr12	0.532543	1
263	Chr06:Chr13	0.678034	1
264	Chr06:Chr14	2.64135	0.64161
265	Chr06:Chr16	1.1173	0.999999
266	Chr06:Chr17	0.639291	1
267	Chr06:Chr18	0.905299	1
268	Chr06:Chr20	0.973264	1
269	Chr06:Chr21	0.480986	1
270	Chr06:Chr23	2.12022	0.943776
271	Chr06:Chr24	1.06958	1
272	Chr06:Chr26	0.627853	1
273	Chr06:Chr28	1.01706	1
274	Chr07:Chr08	0.360109	1
275	Chr07:Chr11	0.999231	1
276	Chr07:Chr12	1.46533	0.999752
277	Chr07:Chr13	2.81116	0.502053
278	Chr07:Chr14	1.21026	0.999994
279	Chr07:Chr16	0.63467	1
280	Chr07:Chr17	1.45978	0.999769
281	Chr07:Chr18	0.874101	1
282	Chr07:Chr20	0.659487	1
283	Chr07:Chr21	2.71829	0.578666
284	Chr07:Chr23	0.305393	1
285	Chr07:Chr24	0.622132	1
286	Chr07:Chr26	0.873756	1
287	Chr07:Chr28	2.53409	0.725191
288	Chr08:Chr11	1.44142	0.999816
289	Chr08:Chr12	1.8977	0.985357
290	Chr08:Chr13	3.12412	0.270941
291	Chr08:Chr14	0.835682	1
292	Chr08:Chr16	1.01287	1
293	Chr08:Chr17	1.8108	0.992329
294	Chr08:Chr18	1.38612	0.999911
295	Chr08:Chr20	1.08534	0.999999
296	Chr08:Chr21	3.25351	0.197796
297	Chr08:Chr23	0.133812	1
298	Chr08:Chr24	1.10959	0.999999
299	Chr08:Chr26	1.09165	0.999999
300	Chr08:Chr28	2.83059	0.486182
301	Chr11:Chr12	0.719717	1
302	Chr11:Chr13	2.21419	0.9116
303	Chr11:Chr14	2.11046	0.946553
304	Chr11:Chr16	0.273777	1
305	Chr11:Chr17	0.598015	1
306	Chr11:Chr18	0.115324	1
307	Chr11:Chr20	0.0673459	1
308	Chr11:Chr21	2.13657	0.938895
309	Chr11:Chr23	1.40227	0.999889
310	Chr11:Chr24	0.315673	1
311	Chr11:Chr26	0.216673	1
312	Chr11:Chr28	2.08103	0.954317
313	Chr12:Chr13	1.38857	0.999908
314	Chr12:Chr14	2.59156	0.681234
315	Chr12:Chr16	0.8306	1
316	Chr12:Chr17	0.0248081	1
317	Chr12:Chr18	0.630472	1
318	Chr12:Chr20	0.705649	1
319	Chr12:Chr21	1.1399	0.999998
320	Chr12:Chr23	1.84617	0.989929
321	Chr12:Chr24	0.845698	1
322	Chr12:Chr26	0.193833	1
323	Chr12:Chr28	1.47308	0.999727
324	Chr13:Chr14	3.4652	0.110246
325	Chr13:Chr16	2.02073	0.967577
326	Chr13:Chr17	1.53391	0.999444
327	Chr13:Chr18	1.85171	0.989502
328	Chr13:Chr20	1.67937	0.997522
329	Chr13:Chr21	0.327542	1
330	Chr13:Chr23	3.1766	0.239443
331	Chr13:Chr24	2.09444	0.950891
332	Chr13:Chr26	1.23882	0.99999
333	Chr13:Chr28	0.581933	1
334	Chr14:Chr16	1.63713	0.998349
335	Chr14:Chr17	2.52595	0.731226
336	Chr14:Chr18	2.1022	0.948823
337	Chr14:Chr20	1.64227	0.998263
338	Chr14:Chr21	3.42117	0.125354
339	Chr14:Chr23	1.0395	1
340	Chr14:Chr24	1.71123	0.996681
341	Chr14:Chr26	1.69197	0.997214
342	Chr14:Chr28	3.1869	0.233554
343	Chr16:Chr17	0.678188	1
344	Chr16:Chr18	0.354592	1
345	Chr16:Chr20	0.0997234	1
346	Chr16:Chr21	1.81723	0.991932
347	Chr16:Chr23	0.925704	1
348	Chr16:Chr24	0.0212456	1
349	Chr16:Chr26	0.308235	1
350	Chr16:Chr28	1.93548	0.981038
351	Chr17:Chr18	0.573999	1
352	Chr17:Chr20	0.493204	1
353	Chr17:Chr21	1.4589	0.999771
354	Chr17:Chr23	1.93361	0.981274
355	Chr17:Chr24	0.71031	1
356	Chr17:Chr26	0.156576	1
357	Chr17:Chr28	1.60932	0.998751
358	Chr18:Chr20	0.273551	1
359	Chr18:Chr21	1.58066	0.999074
360	Chr18:Chr23	1.30849	0.999971
361	Chr18:Chr24	0.422259	1
362	Chr18:Chr26	0.10546	1
363	Chr18:Chr28	1.74558	0.995514
364	Chr20:Chr21	1.62117	0.998592
365	Chr20:Chr23	0.950997	1
366	Chr20:Chr24	0.0904589	1
367	Chr20:Chr26	0.14427	1
368	Chr20:Chr28	1.91354	0.983654
369	Chr21:Chr23	3.31692	0.167502
370	Chr21:Chr24	1.97459	0.975557
371	Chr21:Chr26	1.03727	1
372	Chr21:Chr28	0.868545	1
373	Chr23:Chr24	1.01779	1
374	Chr23:Chr26	1.02919	1
375	Chr23:Chr28	2.73663	0.563517
376	Chr24:Chr26	0.214469	1
377	Chr24:Chr28	2.0089	0.969791
378	Chr26:Chr28	1.45594	0.999779
