# Supplementary material for: Prophage-encoded Hm-oscar gene recapitulates Wolbachia-induced male-killing in the tea tortrix moth Homona magnanima
Source: eLife. 2025 Apr 14;13:RP101101. doi: 10.7554/eLife.101101 (PMC11996169; doi:10.7554/eLife.101101)
Supplement: Figure 3—source data 7. [file elife-101101-fig3-data7.xlsx]

## Sheet: Sheet1
Fig.3d
chromosome	Log2[NSRM-NSRF]
Chr01	0.262176
Chr01	0.163322
Chr01	0.188227
Chr01	-0.207091
Chr01	0.227532
Chr01	0.235451
Chr01	0.758635
Chr01	0.148408
Chr01	0.14388
Chr01	0.209223
Chr01	-0.610819
Chr01	0.595073
Chr01	0.230008
Chr01	0.358562
Chr01	0.0026258
Chr01	0.448246
Chr01	-1.3933
Chr01	2.582
Chr01	-0.0256031
Chr01	0.248133
Chr01	0.0393734
Chr01	-0.120119
Chr01	0.00984071
Chr01	-0.149728
Chr01	-0.149315
Chr01	-0.0952563
Chr01	0.0813345
Chr01	0.0813345
Chr01	0.00808842
Chr01	0.0756428
Chr01	-0.00112692
Chr01	-0.0254202
Chr01	-0.372369
Chr01	-0.895759
Chr01	-0.210984
Chr01	0.130864
Chr01	0.585529
Chr01	0.0173021
Chr01	0.318824
Chr01	-0.404019
Chr01	0.0486292
Chr01	-0.479845
Chr01	-0.0215068
Chr01	0.458641
Chr01	-0.643842
Chr01	-0.366066
Chr01	-0.318619
Chr01	0.133663
Chr01	0.254866
Chr01	-0.0183801
Chr01	0.619675
Chr01	0.129267
Chr01	-0.391461
Chr01	-0.0883356
Chr01	0.00682821
Chr01	0.852921
Chr01	-0.575886
Chr01	-0.140031
Chr01	-0.140031
Chr01	-0.0993013
Chr01	-0.126693
Chr01	-0.422619
Chr01	-0.191999
Chr01	0.221361
Chr01	0.393878
Chr01	0.0423707
Chr01	0.0761171
Chr01	0.66542
Chr01	-0.105206
Chr01	-0.309905
Chr01	0.414985
Chr01	-0.739189
Chr01	-0.440341
Chr01	-0.440341
Chr01	0.152941
Chr01	0.152941
Chr01	-0.0103614
Chr01	0.258588
Chr01	-0.0123895
Chr01	-0.855717
Chr01	-0.765419
Chr01	0.912342
Chr01	-0.483218
Chr01	0.0328257
Chr01	0.139046
Chr01	0.676709
Chr01	0.134812
Chr01	0.0926744
Chr01	0.167309
Chr01	-0.231935
Chr01	0.248091
Chr01	0.284523
Chr01	0.412246
Chr01	-0.553672
Chr01	-0.547297
Chr01	0.124746
Chr01	-0.214908
Chr01	0.259166
Chr01	-0.0664003
Chr01	-0.32075
Chr01	0.179166
Chr01	0.080187
Chr01	0.449487
Chr01	-0.0552624
Chr01	0.10039
Chr01	1.05473
Chr01	0.591424
Chr01	1.00531
Chr01	0.309417
Chr01	-0.199476
Chr01	0.0929218
Chr01	0.521337
Chr01	-0.479265
Chr01	0.848603
Chr01	1.54552
Chr01	-0.175093
Chr01	0.263886
Chr01	0.263886
Chr01	0.282533
Chr01	0.0735653
Chr01	0.251641
Chr01	-0.0333554
Chr01	-0.139756
Chr01	0.477005
Chr01	0.466092
Chr01	0.109808
Chr01	-0.335149
Chr01	-0.502673
Chr01	-0.134756
Chr01	0.0966131
Chr01	-0.387244
Chr01	0.427292
Chr01	0.279912
Chr01	0.312557
Chr01	-0.170037
Chr01	0.08757
Chr01	-0.293066
Chr01	-0.338642
Chr01	0.352328
Chr01	0.277172
Chr01	-0.280283
Chr01	1.18745
Chr01	-0.287283
Chr01	-0.244697
Chr01	0.237435
Chr01	-0.335767
Chr01	-0.215527
Chr01	-0.263209
Chr01	0.11638
Chr01	-0.0150921
Chr01	-0.047451
Chr01	0.224654
Chr01	0.265131
Chr01	0.630293
Chr01	-0.0161912
Chr01	0.325281
Chr01	-0.792967
Chr01	-0.256708
Chr01	0.773124
Chr01	0.160704
Chr01	0.377844
Chr01	-0.206075
Chr01	0.81244
Chr01	-0.903618
Chr01	0.509281
Chr01	0.509281
Chr01	0.404127
Chr01	0.404127
Chr01	-0.439426
Chr01	0.0363707
Chr01	0.0363707
Chr01	0.65687
Chr01	0.175516
Chr01	0.0594888
Chr01	0.0594888
Chr01	0.0198727
Chr01	0.102191
Chr01	-0.165584
Chr01	0.0927248
Chr01	-0.0581547
Chr01	-0.0145972
Chr01	0.243186
Chr01	-0.22691
Chr01	0.385963
Chr01	-1.48966
Chr01	0.484045
Chr01	0.484045
Chr01	-0.382978
Chr01	-0.031495
Chr01	-0.031495
Chr01	-0.361772
Chr01	0.693196
Chr01	0.084881
Chr01	-0.0292822
Chr01	-0.156132
Chr01	-0.283683
Chr01	0.958924
Chr01	0.10854
Chr01	-0.00662178
Chr01	-0.00662178
Chr01	0.0767736
Chr01	0.0262427
Chr01	0.215788
Chr01	0.0543372
Chr01	-0.627044
Chr01	0.78609
Chr01	0.457836
Chr01	-0.3884
Chr01	0.0233652
Chr01	-0.201367
Chr01	0.0770192
Chr01	-0.157057
Chr01	-0.547172
Chr01	0.10351
Chr01	-0.524992
Chr01	0.361893
Chr01	-0.115455
Chr01	-0.745883
Chr01	-0.187349
Chr01	-0.78401
Chr01	-0.78401
Chr01	0.10933
Chr01	-0.213673
Chr01	0.219821
Chr01	0.103152
Chr01	-0.118016
Chr01	0.171315
Chr01	0.0249476
Chr01	0.0249476
Chr01	-0.168752
Chr01	-0.0601504
Chr01	-0.208747
Chr01	0.0834819
Chr01	0.0808769
Chr01	-0.138246
Chr01	-0.138246
Chr01	1.77074
Chr01	-0.863818
Chr01	0.690611
Chr01	-0.413636
Chr01	0.352296
Chr01	-0.212229
Chr01	-0.212229
Chr01	0.00801475
Chr01	-0.690237
Chr01	-0.200753
Chr01	-0.217152
Chr01	0.244873
Chr01	0.0744464
Chr01	0.478159
Chr01	0.0510116
Chr01	0.417966
Chr01	0.680588
Chr01	0.147938
Chr01	0.399856
Chr01	0.0982427
Chr01	0.122268
Chr01	0.287635
Chr01	0.141438
Chr01	-0.445897
Chr01	0.145371
Chr01	1.19212
Chr01	0.116802
Chr01	-0.0121985
Chr01	-0.0793127
Chr01	-0.0250285
Chr01	0.514597
Chr01	-0.178012
Chr01	-0.0346158
Chr01	-0.633475
Chr01	0.5999
Chr01	-0.292209
Chr01	0.319522
Chr01	0.236986
Chr01	0.321948
Chr01	0.376551
Chr01	-0.0929609
Chr01	-0.0949331
Chr01	0.440791
Chr01	0.305116
Chr01	0.543384
Chr01	0.210651
Chr01	0.0465823
Chr01	-0.363136
Chr01	0.0431675
Chr01	-0.309489
Chr01	-0.0784405
Chr01	0.0855998
Chr01	0.58538
Chr01	0.20429
Chr01	0.0638736
Chr01	-0.375278
Chr01	0.829116
Chr01	-0.290834
Chr01	0.411244
Chr01	0.750821
Chr01	-0.260771
Chr01	-0.411703
Chr01	-0.0296728
Chr01	0.326577
Chr01	-0.503823
Chr01	0.755729
Chr01	0.447292
Chr01	0.0159135
Chr01	0.806175
Chr01	-0.0812362
Chr01	-0.230929
Chr01	0.099802
Chr01	0.395917
Chr01	-0.324416
Chr01	0.775945
Chr01	0.504674
Chr01	-0.937679
Chr01	0.12317
Chr01	-0.252861
Chr01	1.03517
Chr01	-0.556933
Chr01	0.397693
Chr01	0.391702
Chr01	0.391702
Chr01	0.258066
Chr01	0.258066
Chr01	-0.243744
Chr01	0.540541
Chr01	0.160617
Chr01	0.124025
Chr01	0.444056
Chr01	0.168684
Chr01	0.951755
Chr01	0.132259
Chr01	-0.0198827
Chr01	0.0647132
Chr01	0.341901
Chr01	0.404884
Chr01	0.267839
Chr01	0.2725
Chr01	0.0967345
Chr01	0.0929391
Chr01	-0.827426
Chr01	0.295387
Chr01	-0.161219
Chr01	-0.0626058
Chr01	-0.0626058
Chr01	0.402978
Chr01	0.235661
Chr01	0.368227
Chr01	-0.0127753
Chr01	-0.0127753
Chr01	-0.212553
Chr01	0.0963036
Chr01	0.424551
Chr01	0.33879
Chr01	0.228336
Chr01	-0.119839
Chr01	0.0619614
Chr01	0.395885
Chr01	-0.110564
Chr01	0.124741
Chr01	0.0373274
Chr01	0.381255
Chr01	-0.515609
Chr01	0.00171846
Chr01	0.00171846
Chr01	-0.254992
Chr01	-0.130275
Chr01	0.572039
Chr01	0.27474
Chr01	-0.0968985
Chr01	-0.228791
Chr01	-0.704538
Chr01	-0.33615
Chr01	0.859858
Chr01	-0.592249
Chr01	0.525388
Chr01	-0.42783
Chr01	0.496117
Chr01	-0.330151
Chr01	-0.0363452
Chr01	-0.178739
Chr01	-0.07203
Chr01	0.329621
Chr01	-0.0711116
Chr01	0.278781
Chr01	0.278781
Chr01	0.0116506
Chr01	-0.384339
Chr01	-0.0144811
Chr01	0.399872
Chr01	0.145465
Chr01	0.282545
Chr01	0.470858
Chr01	0.501462
Chr01	0.299369
Chr01	-0.0688823
Chr01	-0.299533
Chr01	0.570439
Chr01	-0.433516
Chr01	1.14393
Chr01	-0.183875
Chr01	-0.0186042
Chr01	0.524933
Chr01	-0.340397
Chr01	0.35989
Chr01	-0.170147
Chr01	0.732114
Chr01	0.256531
Chr01	-0.348557
Chr01	0.304983
Chr01	0.151384
Chr01	0.315844
Chr01	0.315844
Chr01	-0.062995
Chr01	3.03637
Chr01	0.612439
Chr01	0.0510208
Chr01	-0.233716
Chr01	0.0165529
Chr01	0.0165529
Chr01	0.188566
Chr01	-0.0215674
Chr01	0.0295177
Chr01	0.879681
Chr01	0.528602
Chr01	0.208877
Chr01	1.21627
Chr01	0.393731
Chr01	0.0281457
Chr01	0.556269
Chr01	0.166943
Chr01	0.00448751
Chr01	-0.637912
Chr01	0.219783
Chr01	-0.484363
Chr01	0.579794
Chr01	0.251984
Chr01	0.88099
Chr01	0.713682
Chr01	-0.732859
Chr01	-0.0311684
Chr01	0.0967578
Chr01	0.212958
Chr01	0.212958
Chr01	-0.271133
Chr01	0.27245
Chr01	0.153318
Chr01	-0.0757603
Chr01	0.89821
Chr01	0.0908424
Chr01	0.0908424
Chr01	-0.107265
Chr01	-0.31494
Chr01	0.091197
Chr01	-0.27704
Chr01	-0.27704
Chr01	0.220006
Chr01	-1.57446
Chr01	0.14652
Chr01	0.396076
Chr01	0.154142
Chr01	0.154142
Chr01	0.404666
Chr01	0.404666
Chr01	-0.400604
Chr01	-0.400604
Chr01	0.252435
Chr01	-0.404942
Chr01	0.214443
Chr01	-0.513676
Chr01	-0.534298
Chr01	0.0352056
Chr01	0.0352056
Chr01	0.0352056
Chr01	0.0352056
Chr01	0.0352056
Chr01	0.0352056
Chr01	0.0352056
Chr01	0.0352056
Chr01	0.0352056
Chr01	0.0352056
Chr01	0.0352056
Chr01	0.0352056
Chr01	0.0541767
Chr01	-0.118937
Chr01	-0.118937
Chr01	-0.118937
Chr01	-0.118937
Chr01	-0.118937
Chr01	-0.118937
Chr01	-0.228684
Chr01	0.609221
Chr01	-0.438024
Chr01	0.633059
Chr01	-0.402123
Chr01	-0.983513
Chr01	-0.0290584
Chr01	0.414541
Chr01	0.256873
Chr01	0.256873
Chr01	0.256873
Chr01	0.256873
Chr01	0.256873
Chr01	0.0926843
Chr01	0.0926843
Chr01	0.0926843
Chr01	0.0926843
Chr01	0.0926843
Chr01	0.600176
Chr01	0.139944
Chr01	-0.111351
Chr01	-0.111351
Chr01	-0.111351
Chr01	-0.111351
Chr01	0.519604
Chr01	0.0344852
Chr01	0.0239125
Chr01	-0.907477
Chr01	0.369235
Chr01	0.459493
Chr01	0.276802
Chr01	-0.087831
Chr01	0.720086
Chr01	0.114817
Chr01	0.114817
Chr01	0.00586373
Chr01	-1.12986
Chr01	-0.324695
Chr01	-0.379354
Chr01	1.48582
Chr01	0.0264898
Chr01	-0.744984
Chr01	-1.09949
Chr01	0.450204
Chr01	0.591298
Chr01	0.165909
Chr01	0.100452
Chr01	-0.379817
Chr01	-0.379817
Chr01	0.014583
Chr01	-0.809284
Chr01	-0.447578
Chr01	-0.447578
Chr01	0.33379
Chr01	0.239555
Chr01	0.243506
Chr01	-0.195222
Chr01	0.10785
Chr01	-0.17735
Chr01	-0.17735
Chr01	-0.0875218
Chr01	0.420298
Chr01	0.0824958
Chr01	-0.199507
Chr01	-0.0704543
Chr01	0.0469253
Chr01	0.147966
Chr02	-1.40898
Chr02	0.100615
Chr02	-0.33601
Chr02	-0.263819
Chr02	0.154225
Chr02	-0.805323
Chr02	0.759847
Chr02	0.254187
Chr02	0.570337
Chr02	0.0578096
Chr02	0.0966181
Chr02	0.00629283
Chr02	0.682945
Chr02	0.682945
Chr02	0.682945
Chr02	0.682945
Chr02	0.682945
Chr02	0.682945
Chr02	0.682945
Chr02	-1.58234
Chr02	1.21495
Chr02	1.21495
Chr02	-0.973339
Chr02	-0.973339
Chr02	-0.973339
Chr02	-0.973339
Chr02	-0.973339
Chr02	-0.973339
Chr02	-0.973339
Chr02	-1.4672
Chr02	-1.11403
Chr02	-1.11403
Chr02	-1.11403
Chr02	-1.11403
Chr02	0.657292
Chr02	0.657292
Chr02	0.657292
Chr02	-0.266851
Chr02	0.565736
Chr02	-0.384929
Chr02	0.525394
Chr02	0.494398
Chr02	0.292702
Chr02	0.241534
Chr02	-0.078847
Chr02	-0.0222572
Chr02	0.306265
Chr02	0.426506
Chr02	0.333254
Chr02	0.455602
Chr02	0.0762883
Chr02	1.24701
Chr02	-1.20529
Chr02	-0.2587
Chr02	0.176277
Chr02	0.496287
Chr02	-0.0976313
Chr02	-0.0976313
Chr02	1.17078
Chr02	-0.4716
Chr02	-0.529543
Chr02	-0.0296722
Chr02	-0.445342
Chr02	-0.238663
Chr02	0.026351
Chr02	0.244032
Chr02	0.643912
Chr02	0.643912
Chr02	0.0825344
Chr02	0.501411
Chr02	-0.501371
Chr02	0.486234
Chr02	0.501476
Chr02	1.8905
Chr02	-0.756265
Chr02	-0.11704
Chr02	-0.0305887
Chr02	0.301744
Chr02	0.132987
Chr02	0.904496
Chr02	-0.0789678
Chr02	-0.71142
Chr02	0.128535
Chr02	-0.297148
Chr02	-0.235005
Chr02	-0.843724
Chr02	0.405124
Chr02	0.405124
Chr02	0.219746
Chr02	0.219746
Chr02	-0.386696
Chr02	0.203467
Chr02	-0.240694
Chr02	0.24548
Chr02	0.0292007
Chr02	-0.751218
Chr02	0.40973
Chr02	0.571836
Chr02	1.1264
Chr02	-0.909484
Chr02	-1.6002
Chr02	0.0554148
Chr02	-0.512895
Chr02	-0.0162971
Chr02	0.0493036
Chr02	1.01322
Chr02	-0.205721
Chr02	0.158968
Chr02	0.239185
Chr02	-0.886354
Chr02	-0.895057
Chr02	-0.959503
Chr02	-1.20641
Chr02	0.1363
Chr02	-0.251672
Chr02	0.462806
Chr02	0.253813
Chr02	0.300456
Chr02	0.447695
Chr02	-1.78457
Chr02	-1.27352
Chr02	1.27937
Chr02	-0.876913
Chr02	-0.118978
Chr02	-0.730152
Chr02	-0.0841449
Chr02	0.530282
Chr02	-1.82472
Chr02	0.837606
Chr02	0.336772
Chr02	-0.754255
Chr02	0.662604
Chr02	-1.02376
Chr02	1.05035
Chr02	-1.57912
Chr02	0.0132122
Chr02	0.375544
Chr02	0.13837
Chr02	-0.226309
Chr02	0.219512
Chr02	-0.265027
Chr02	-0.90484
Chr02	0.605981
Chr02	0.119817
Chr02	0.327499
Chr02	0.0967284
Chr02	0.122756
Chr02	0.995607
Chr02	-0.522419
Chr02	-2.22049
Chr02	0.467888
Chr02	0.813776
Chr02	-0.123217
Chr02	0.289507
Chr02	0.73519
Chr02	0.558717
Chr02	0.162667
Chr02	-0.0962964
Chr02	0.740746
Chr02	-0.188277
Chr02	0.504616
Chr02	-0.55496
Chr02	-0.147632
Chr02	-0.366155
Chr02	-0.181882
Chr02	0.0748222
Chr02	-0.0766042
Chr02	-0.423761
Chr02	0.4885
Chr02	-0.892725
Chr02	-0.296249
Chr02	-0.660511
Chr02	-0.64242
Chr02	0.586098
Chr02	-0.160726
Chr02	0.139486
Chr02	0.625483
Chr02	-0.460394
Chr02	-0.941212
Chr02	0.378474
Chr02	-0.148916
Chr02	-0.709829
Chr02	0.120836
Chr02	-0.541567
Chr02	0.536025
Chr02	0.419334
Chr02	-0.822509
Chr02	-0.0025261
Chr02	0.366852
Chr02	0.680671
Chr02	0.164693
Chr02	-0.406384
Chr02	0.48006
Chr02	0.648097
Chr02	0.796417
Chr02	-0.759125
Chr02	-1.06197
Chr02	0.601727
Chr02	-0.756611
Chr02	0.28576
Chr02	-0.772271
Chr02	-0.772271
Chr02	0.216187
Chr02	0.76801
Chr02	0.76801
Chr02	-1.22726
Chr02	0.523477
Chr02	-0.650048
Chr02	0.520233
Chr02	1.36083
Chr02	-0.295213
Chr02	0.147083
Chr02	0.72155
Chr02	-0.638451
Chr02	-0.118482
Chr02	0.487709
Chr02	-0.654041
Chr02	0.621443
Chr02	0.510699
Chr02	-0.922062
Chr02	0.524505
Chr02	0.210208
Chr02	0.249505
Chr02	0.059166
Chr02	0.197079
Chr02	-1.31746
Chr02	1.1515
Chr02	0.39558
Chr02	0.991366
Chr02	0.548527
Chr02	0.372164
Chr02	-0.122129
Chr02	0.107855
Chr02	0.00818877
Chr02	0.00818877
Chr02	0.70777
Chr02	0.768367
Chr02	0.768367
Chr02	-0.338425
Chr02	-0.505388
Chr02	0.588746
Chr02	-0.289127
Chr02	0.117341
Chr02	0.117341
Chr02	0.117341
Chr02	0.429943
Chr02	0.429943
Chr02	0.135619
Chr02	0.135619
Chr02	0.135619
Chr02	0.041397
Chr02	0.342073
Chr02	0.476691
Chr02	-0.669211
Chr02	-0.23816
Chr02	0.640541
Chr02	-0.612252
Chr02	0.247606
Chr02	-0.611071
Chr02	-0.187875
Chr02	-0.109003
Chr02	-0.0991518
Chr02	-0.166966
Chr02	-0.12779
Chr02	0.230327
Chr03	-0.474166
Chr03	-1.19364
Chr03	-0.586099
Chr03	0.0573682
Chr03	-0.0251389
Chr03	1.35689
Chr03	1.35689
Chr03	0.0238566
Chr03	-0.390576
Chr03	-0.0263474
Chr03	-1.11327
Chr03	-0.0983936
Chr03	0.142486
Chr03	0.108885
Chr03	-0.0689831
Chr03	0.175447
Chr03	0.401681
Chr03	0.0158644
Chr03	-0.0908054
Chr03	-0.032229
Chr03	-0.267984
Chr03	0.0820885
Chr03	0.703921
Chr03	0.62424
Chr03	-0.125526
Chr03	-0.474294
Chr03	0.556095
Chr03	0.177133
Chr03	0.32098
Chr03	0.24047
Chr03	-0.0423485
Chr03	0.270765
Chr03	0.211581
Chr03	-0.0107487
Chr03	-0.383909
Chr03	-0.0462935
Chr03	-0.254037
Chr03	-0.638447
Chr03	-0.0691183
Chr03	0.20978
Chr03	0.163503
Chr03	-0.486531
Chr03	0.310686
Chr03	-0.230342
Chr03	-0.504037
Chr03	-0.208689
Chr03	0.712075
Chr03	0.308531
Chr03	0.308871
Chr03	-0.0593119
Chr03	-0.228642
Chr03	-0.228642
Chr03	-0.200579
Chr03	-0.112137
Chr03	-0.553359
Chr03	0.404798
Chr03	0.75897
Chr03	-0.670034
Chr03	-0.0908212
Chr03	-0.360533
Chr03	-0.27375
Chr03	0.261022
Chr03	0.358584
Chr03	-0.00413348
Chr03	-0.100026
Chr03	-0.100026
Chr03	0.053325
Chr03	0.340069
Chr03	0.491165
Chr03	0.0358901
Chr03	-0.286492
Chr03	-0.286492
Chr03	-0.589465
Chr03	0.348296
Chr03	-0.726732
Chr03	-0.0747705
Chr03	-0.299639
Chr03	0.104356
Chr03	-0.300091
Chr03	-0.2208
Chr03	0.0256355
Chr03	0.204523
Chr03	-0.10848
Chr03	-0.781662
Chr03	0.509948
Chr03	-0.194886
Chr03	0.836984
Chr03	-0.882557
Chr03	0.0170312
Chr03	-0.349339
Chr03	1.09393
Chr03	-0.170111
Chr03	0.709464
Chr03	-0.0382108
Chr03	-0.093492
Chr03	1.56962
Chr03	-0.411133
Chr03	0.18777
Chr03	0.2528
Chr03	0.866533
Chr03	0.150061
Chr03	-0.307112
Chr03	-0.252452
Chr03	-0.305483
Chr03	-0.0128556
Chr03	-0.131815
Chr03	0.214782
Chr03	0.0651677
Chr03	0.0711751
Chr03	1.17929
Chr03	-0.0536241
Chr03	0.765259
Chr03	-0.00685441
Chr03	0.0679994
Chr03	-0.0198845
Chr03	0.56221
Chr03	0.248453
Chr03	0.299658
Chr03	-0.0952487
Chr03	0.460454
Chr03	0.278798
Chr03	0.117174
Chr03	-0.251002
Chr03	-1.6217
Chr03	-0.178871
Chr03	0.17429
Chr03	-0.899713
Chr03	-0.0796625
Chr03	-0.148808
Chr03	-0.0617222
Chr03	0.156994
Chr03	0.325584
Chr03	0.72006
Chr03	0.276715
Chr03	-0.522852
Chr03	0.147116
Chr03	-0.0566084
Chr03	0.26761
Chr03	-0.0471315
Chr03	-0.333654
Chr03	-0.0285528
Chr03	-0.128043
Chr03	0.0463143
Chr03	0.221329
Chr03	0.446537
Chr03	-0.495126
Chr03	0.153057
Chr03	0.478792
Chr03	-0.358205
Chr03	0.209159
Chr03	0.111811
Chr03	0.433015
Chr03	0.63032
Chr03	-0.328314
Chr03	0.131108
Chr03	0.263058
Chr03	0.635603
Chr03	-0.0723105
Chr03	-0.302856
Chr03	-0.251183
Chr03	0.127577
Chr03	-0.015408
Chr03	0.0416856
Chr03	-0.0811879
Chr03	0.367198
Chr03	-1.25168
Chr03	-0.0313764
Chr03	-0.358326
Chr03	-0.239736
Chr03	-0.181396
Chr03	-0.248668
Chr03	0.454732
Chr03	-0.3302
Chr03	-0.0306098
Chr03	0.0719987
Chr03	-0.396615
Chr03	-0.0500979
Chr03	0.680147
Chr03	0.147099
Chr03	-0.143479
Chr03	-0.0490874
Chr03	-0.0312236
Chr03	-1.68781
Chr03	0.511729
Chr03	-1.86291
Chr03	0.193601
Chr03	0.0405426
Chr03	-0.860574
Chr03	-0.0356973
Chr03	-0.0356973
Chr03	-0.0687172
Chr03	-0.333494
Chr03	0.720566
Chr03	1.04701
Chr03	-0.0425456
Chr03	0.896518
Chr03	0.124127
Chr03	-1.06717
Chr03	0.631862
Chr03	-0.644682
Chr03	0.00737864
Chr03	0.178419
Chr03	0.0389503
Chr03	0.117576
Chr03	0.117576
Chr03	0.390419
Chr03	0.129199
Chr03	0.617803
Chr03	-0.37052
Chr03	0.370623
Chr03	-0.371312
Chr03	-0.114797
Chr03	-0.308805
Chr03	0.164249
Chr03	0.164249
Chr03	0.110852
Chr03	0.110852
Chr03	0.114735
Chr03	0.192418
Chr03	-0.271189
Chr03	0.0814843
Chr03	0.282161
Chr03	0.180576
Chr03	-0.224374
Chr03	0.224254
Chr03	-0.149446
Chr03	-0.362085
Chr03	-0.160196
Chr03	0.298095
Chr03	0.370398
Chr03	0.294358
Chr03	-0.129156
Chr03	-0.603239
Chr03	-0.603239
Chr03	0.0140513
Chr03	-0.0725293
Chr03	0.33259
Chr03	0.0885329
Chr03	-0.765415
Chr03	0.705398
Chr03	-0.471785
Chr03	0.371416
Chr03	0.0577793
Chr03	0.0636362
Chr03	0.0246003
Chr03	0.177833
Chr03	0.177833
Chr03	-0.0996463
Chr03	-0.0429469
Chr03	0.453898
Chr03	0.444188
Chr03	-0.449031
Chr03	-0.300328
Chr03	0.0690588
Chr03	0.131748
Chr03	0.595296
Chr03	0.33339
Chr03	0.247392
Chr03	0.145182
Chr03	-0.0815599
Chr03	0.00373853
Chr03	0.0999394
Chr03	-0.0224662
Chr03	0.873561
Chr03	0.867767
Chr03	-0.192709
Chr03	0.573419
Chr03	-0.38872
Chr03	0.578657
Chr03	0.784794
Chr03	-0.675697
Chr03	0.0724839
Chr03	-0.003916
Chr03	0.0706028
Chr03	0.120353
Chr03	-0.175807
Chr03	0.374593
Chr03	0.0204618
Chr03	0.59437
Chr03	0.00679448
Chr03	-1.17421
Chr03	1.07853
Chr03	0.412182
Chr03	-0.0353334
Chr03	0.509567
Chr03	-0.280197
Chr03	0.462299
Chr03	-0.108847
Chr03	0.315872
Chr03	0.112256
Chr03	0.379189
Chr03	0.241099
Chr03	0.393201
Chr03	0.266017
Chr03	0.0548409
Chr03	0.238921
Chr03	0.121572
Chr03	-0.22309
Chr03	0.51253
Chr03	-0.365625
Chr03	-0.222946
Chr03	0.0941121
Chr03	0.319052
Chr03	-0.280803
Chr03	-0.570898
Chr03	0.747885
Chr03	-0.941341
Chr03	0.554975
Chr03	0.0546594
Chr03	0.0276049
Chr03	0.335073
Chr03	0.254466
Chr03	0.821079
Chr03	0.108898
Chr03	0.431191
Chr03	-0.0205709
Chr03	0.420878
Chr03	0.299677
Chr03	0.176063
Chr03	-0.100348
Chr03	0.473423
Chr03	-0.175136
Chr03	-0.233417
Chr03	-0.336446
Chr03	-0.0194501
Chr03	0.119906
Chr03	-0.148278
Chr03	-0.334854
Chr03	0.124471
Chr03	0.124471
Chr03	0.0781331
Chr03	0.561638
Chr03	0.435527
Chr03	-0.0926773
Chr03	-0.138288
Chr03	-0.0936842
Chr03	-0.0477954
Chr03	-0.0782918
Chr03	-0.0282638
Chr03	0.0863719
Chr03	-0.174716
Chr03	0.0387736
Chr03	0.156614
Chr03	0.113895
Chr03	-0.292447
Chr03	-0.476316
Chr03	0.486956
Chr03	-0.287055
Chr03	0.332555
Chr03	0.138936
Chr03	0.117441
Chr03	-0.0740911
Chr03	-0.217107
Chr03	-0.0114858
Chr03	-0.0942943
Chr03	-0.447761
Chr03	0.29528
Chr03	0.184897
Chr03	-0.00279312
Chr03	-0.220154
Chr03	-0.0383357
Chr03	-0.306317
Chr03	0.543823
Chr03	-0.293451
Chr03	0.171818
Chr03	0.0668179
Chr03	0.0977754
Chr03	-0.242387
Chr03	0.651866
Chr03	0.417812
Chr03	-0.0163561
Chr03	0.0959903
Chr03	0.225556
Chr03	-0.330898
Chr03	-0.121896
Chr03	0.0264652
Chr03	-0.561115
Chr03	-0.445081
Chr03	-0.397095
Chr03	0.13764
Chr03	-0.247712
Chr03	0.201138
Chr03	-0.457808
Chr03	-0.0689648
Chr03	-0.883605
Chr03	0.341634
Chr03	0.00824406
Chr03	-0.050304
Chr03	0.445271
Chr03	-0.261683
Chr03	0.1827
Chr03	0.414128
Chr03	0.808051
Chr03	-0.42516
Chr03	0.0682622
Chr03	-0.378921
Chr03	0.10423
Chr03	-0.121244
Chr03	-1.26313
Chr03	-0.214647
Chr03	0.358763
Chr03	-0.0790347
Chr03	0.146693
Chr03	-0.807295
Chr03	0.17139
Chr03	-0.296328
Chr03	0.12267
Chr03	1.13867
Chr03	-0.129144
Chr03	0.291736
Chr03	0.0147095
Chr03	0.219327
Chr03	0.185273
Chr03	-0.620524
Chr03	-0.103178
Chr03	-0.664132
Chr03	-0.151199
Chr03	0.203629
Chr03	0.227916
Chr03	0.148952
Chr03	-0.344375
Chr03	-0.344375
Chr03	-0.344375
Chr03	-0.344375
Chr03	0.133034
Chr03	0.133034
Chr03	0.133034
Chr03	0.133034
Chr03	-0.475279
Chr03	-0.475279
Chr03	-0.475279
Chr03	-0.475279
Chr03	-0.475279
Chr03	-0.475279
Chr03	-0.475279
Chr03	-0.475279
Chr03	0.271786
Chr03	0.271786
Chr03	0.271786
Chr03	0.271786
Chr03	0.404147
Chr03	0.404147
Chr03	0.404147
Chr03	0.404147
Chr03	0.404147
Chr03	0.404147
Chr03	0.404147
Chr03	0.404147
Chr03	0.0193376
Chr03	0.0187311
Chr03	0.380076
Chr03	-0.0306967
Chr03	-0.536382
Chr03	0.214629
Chr03	0.204265
Chr03	-0.401331
Chr03	0.201683
Chr03	0.306473
Chr03	0.317807
Chr03	0.0163715
Chr03	0.206751
Chr03	0.341057
Chr03	0.33012
Chr03	0.0633225
Chr03	-0.0507951
Chr03	-0.0517587
Chr03	0.129508
Chr03	-0.0240015
Chr03	0.106072
Chr03	0.395223
Chr03	-0.32587
Chr03	-0.32587
Chr03	-0.32587
Chr03	-0.32587
Chr03	0.576131
Chr03	0.576131
Chr03	0.576131
Chr03	0.576131
Chr03	0.808408
Chr03	0.808408
Chr03	0.808408
Chr03	0.808408
Chr03	-0.312526
Chr03	-0.20387
Chr03	-0.784154
Chr03	0.310996
Chr03	0.102642
Chr03	0.0486987
Chr03	0.0093718
Chr03	0.384736
Chr03	0.384736
Chr03	-0.200629
Chr03	-0.200629
Chr03	0.107406
Chr03	-0.148869
Chr03	0.337708
Chr03	0.219293
Chr03	0.450013
Chr03	0.0206126
Chr03	0.217185
Chr03	-0.230276
Chr03	0.492809
Chr03	0.297952
Chr03	0.0866812
Chr03	-0.394729
Chr03	0.984825
Chr04	0.0295029
Chr04	-0.679867
Chr04	0.0761702
Chr04	0.382325
Chr04	-0.308696
Chr04	0.086426
Chr04	0.0084768
Chr04	-0.370208
Chr04	0.0969764
Chr04	0.0489356
Chr04	-0.726635
Chr04	0.392167
Chr04	-0.714157
Chr04	-0.221683
Chr04	-0.212035
Chr04	0.899981
Chr04	0.276789
Chr04	-0.541723
Chr04	-0.066503
Chr04	0.14346
Chr04	-0.18758
Chr04	-0.625737
Chr04	-0.0790445
Chr04	-0.306676
Chr04	0.271409
Chr04	-0.0394132
Chr04	-0.147568
Chr04	-0.091649
Chr04	-0.357614
Chr04	0.0352052
Chr04	0.263073
Chr04	0.190718
Chr04	-0.179749
Chr04	-0.209874
Chr04	-0.123843
Chr04	0.035359
Chr04	0.00840856
Chr04	-0.159559
Chr04	-0.0594879
Chr04	-0.683419
Chr04	0.470752
Chr04	0.0800883
Chr04	-0.42201
Chr04	0.058703
Chr04	0.540878
Chr04	-0.753158
Chr04	-0.0340665
Chr04	0.0375942
Chr04	-0.42611
Chr04	-0.501725
Chr04	-0.053739
Chr04	-0.379167
Chr04	-0.40066
Chr04	-0.0378213
Chr04	0.11342
Chr04	-0.557589
Chr04	0.209278
Chr04	-0.187106
Chr04	-0.903027
Chr04	0.224349
Chr04	-0.056415
Chr04	0.820822
Chr04	0.0886745
Chr04	0.217596
Chr04	0.336901
Chr04	0.37079
Chr04	0.0776324
Chr04	-0.989714
Chr04	0.0492853
Chr04	0.535075
Chr04	0.535075
Chr04	0.471083
Chr04	0.0739563
Chr04	0.0739563
Chr04	0.0543284
Chr04	-0.140207
Chr04	-0.431742
Chr04	0.454436
Chr04	-0.411306
Chr04	-0.411306
Chr04	-0.0219464
Chr04	0.602825
Chr04	0.673747
Chr04	0.16422
Chr04	-0.417449
Chr04	-0.26065
Chr04	-0.138271
Chr04	0.283977
Chr04	-0.139001
Chr04	-0.325344
Chr04	-0.984078
Chr04	-0.984078
Chr04	-0.0149948
Chr04	-0.0645007
Chr04	0.154938
Chr04	-0.167448
Chr04	0.00162784
Chr04	-0.475339
Chr04	-0.17918
Chr04	0.063224
Chr04	-0.127073
Chr04	-0.307297
Chr04	-0.447938
Chr04	-0.447938
Chr04	-0.447938
Chr04	0.0588709
Chr04	-0.115635
Chr04	-0.00176264
Chr04	-0.00176264
Chr04	0.107755
Chr04	-0.143843
Chr04	-0.0398934
Chr04	0.156212
Chr04	-0.419747
Chr04	-0.0124058
Chr04	-0.878184
Chr04	0.173193
Chr04	-0.207904
Chr04	0.0167483
Chr04	-0.210046
Chr04	0.0265213
Chr04	-0.120669
Chr04	0.0682491
Chr04	0.37589
Chr04	-0.213015
Chr04	-0.103609
Chr04	-0.133608
Chr04	-0.627913
Chr04	-0.601599
Chr04	-0.414544
Chr04	-0.113639
Chr04	0.116892
Chr04	0.0196146
Chr04	-0.337194
Chr04	0.162405
Chr04	-0.71915
Chr04	-0.130696
Chr04	-1.00197
Chr04	0.393672
Chr04	0.0491474
Chr04	0.106812
Chr04	-0.285413
Chr04	0.118106
Chr04	0.293475
Chr04	-0.113365
Chr04	0.206811
Chr04	0.206099
Chr04	-0.361526
Chr04	-0.0188814
Chr04	0.322066
Chr04	-0.110006
Chr04	0.0671878
Chr04	-0.0725554
Chr04	0.335898
Chr04	0.060378
Chr04	-0.819707
Chr04	-0.000380955
Chr04	-0.261358
Chr04	-0.0649375
Chr04	0.642822
Chr04	0.292103
Chr04	0.258971
Chr04	-0.0979554
Chr04	-0.104801
Chr04	0.579982
Chr04	-0.185656
Chr04	0.639888
Chr04	0.0308492
Chr04	0.776068
Chr04	0.305638
Chr04	0.172024
Chr04	-1.27722
Chr04	-1.27722
Chr04	0.236412
Chr04	0.236412
Chr04	0.803571
Chr04	0.803571
Chr04	-0.166929
Chr04	0.264946
Chr04	0.16206
Chr04	0.642509
Chr04	0.00854365
Chr04	-0.0160293
Chr04	-0.801776
Chr04	-0.114172
Chr04	0.0577934
Chr04	0.0577934
Chr04	-0.180457
Chr04	-0.398584
Chr04	-0.0755901
Chr04	0.170638
Chr04	-0.242224
Chr04	-0.52975
Chr04	0.158213
Chr04	-0.384747
Chr04	-0.384747
Chr04	-1.07046
Chr04	-0.316222
Chr04	-0.235822
Chr04	0.0852733
Chr04	-0.129564
Chr04	-0.361788
Chr04	-0.0238778
Chr04	0.195671
Chr04	-0.445456
Chr04	-0.24824
Chr04	0.0187756
Chr04	-0.413606
Chr04	0.0531461
Chr04	1.10376
Chr04	-0.0388384
Chr04	0.574135
Chr04	-0.300047
Chr04	-0.458948
Chr04	-0.057235
Chr04	0.841694
Chr04	-0.280524
Chr04	-0.0542099
Chr04	0.613763
Chr04	0.613763
Chr04	-0.31094
Chr04	-0.0242379
Chr04	0.316074
Chr04	0.316074
Chr04	-0.509126
Chr04	0.159861
Chr04	0.290508
Chr04	0.0489114
Chr04	-0.188024
Chr04	-0.305614
Chr04	-0.0381415
Chr04	-0.388869
Chr04	0.546172
Chr04	-0.132421
Chr04	-0.0806057
Chr04	-1.19175
Chr04	0.0555716
Chr04	0.484024
Chr04	-0.0993066
Chr04	0.108885
Chr04	0.287984
Chr04	-0.0700733
Chr04	1.29256
Chr04	0.01754
Chr04	0.528538
Chr04	-0.0754533
Chr04	-1.40686
Chr04	-0.342645
Chr04	-0.62217
Chr04	0.35753
Chr04	0.359314
Chr04	0.344126
Chr04	-0.0280016
Chr04	-0.584618
Chr04	0.489028
Chr04	-0.305682
Chr04	0.530745
Chr04	-0.0494829
Chr04	0.468182
Chr04	0.104724
Chr04	-0.500652
Chr04	0.28681
Chr04	0.385083
Chr04	-0.199639
Chr04	0.0555061
Chr04	0.109519
Chr04	-0.793652
Chr04	0.0608988
Chr04	0.101561
Chr04	0.446692
Chr04	0.859809
Chr04	1.07553
Chr04	1.07553
Chr04	-0.166634
Chr04	0.408112
Chr04	-0.0479778
Chr04	-0.136602
Chr04	-0.512475
Chr04	0.338628
Chr04	0.366484
Chr04	-0.423505
Chr04	0.431
Chr04	-0.085613
Chr04	-0.405716
Chr04	0.123978
Chr04	0.213317
Chr04	-0.118177
Chr04	-0.17388
Chr04	0.304974
Chr04	0.0653717
Chr04	-0.291436
Chr04	-0.143922
Chr04	-0.0122566
Chr04	-0.945974
Chr04	0.105389
Chr04	0.121791
Chr04	-0.334977
Chr04	-1.40493
Chr04	-0.115113
Chr04	0.066403
Chr04	0.123616
Chr04	0.0621028
Chr04	-0.100312
Chr04	-0.470992
Chr04	-0.0101905
Chr04	-0.488163
Chr04	-0.262548
Chr04	0.858147
Chr04	0.160831
Chr04	0.139883
Chr04	-1.13638
Chr04	-0.0694442
Chr04	0.694071
Chr04	-0.144638
Chr04	0.313129
Chr04	0.213652
Chr04	0.337193
Chr04	-1.07905
Chr04	-1.07905
Chr04	1.06227
Chr04	0.113476
Chr04	0.355272
Chr04	0.124297
Chr04	0.0774152
Chr04	-0.0442819
Chr04	-0.348544
Chr04	-0.132882
Chr04	-0.265969
Chr04	-0.268155
Chr04	0.101558
Chr04	0.160553
Chr04	0.0477899
Chr04	-0.220285
Chr04	0.00646672
Chr04	0.316955
Chr04	0.033286
Chr04	0.434351
Chr04	0.434351
Chr04	-0.569136
Chr04	0.0620605
Chr04	0.0846746
Chr04	-0.10469
Chr04	0.0901651
Chr04	0.172296
Chr04	-0.293798
Chr04	0.430283
Chr04	0.119195
Chr04	0.296708
Chr04	-1.19641
Chr04	0.0709756
Chr04	-0.407347
Chr04	-0.407347
Chr04	0.162416
Chr04	0.162416
Chr04	0.105234
Chr04	0.0457578
Chr04	0.575618
Chr04	0.231274
Chr04	-0.508767
Chr04	1.04685
Chr04	-0.198079
Chr04	0.125702
Chr04	-0.0925253
Chr04	-0.0444914
Chr04	-0.105925
Chr04	0.30561
Chr04	-0.524085
Chr04	0.257228
Chr04	0.257228
Chr04	0.257228
Chr04	0.134161
Chr04	-0.599654
Chr04	0.0393581
Chr04	0.607665
Chr04	-0.431785
Chr04	1.29563
Chr04	0.625677
Chr04	0.384803
Chr04	-0.756062
Chr04	0.00863445
Chr04	0.0164644
Chr04	0.250436
Chr04	0.0324072
Chr04	0.41925
Chr04	0.0540453
Chr04	-0.156458
Chr04	0.418814
Chr04	0.444169
Chr04	0.159687
Chr04	-0.522702
Chr04	0.233491
Chr04	-0.0035914
Chr04	-0.575161
Chr04	-0.228124
Chr04	-0.0704993
Chr04	0.0536366
Chr04	0.127042
Chr04	-0.268246
Chr04	0.20249
Chr04	-0.920334
Chr04	0.646544
Chr04	0.482255
Chr04	-0.207205
Chr04	-0.305142
Chr04	-0.656343
Chr04	-0.184336
Chr04	-0.476024
Chr04	-0.421329
Chr04	-0.279472
Chr04	-0.127406
Chr04	0.367904
Chr04	0.214741
Chr04	0.395302
Chr04	0.0826931
Chr04	0.0537537
Chr04	0.151667
Chr04	0.018079
Chr04	-0.636332
Chr04	0.972391
Chr04	-0.274754
Chr04	-0.927634
Chr04	-0.0101302
Chr04	0.174777
Chr04	-0.223259
Chr04	-0.37465
Chr04	0.327511
Chr04	0.535268
Chr04	-0.0544116
Chr04	0.326215
Chr04	-0.00573031
Chr04	-0.055601
Chr04	0.318221
Chr04	-0.00317598
Chr04	0.474086
Chr04	0.11494
Chr04	0.315073
Chr04	-0.178377
Chr04	-0.0825829
Chr04	-0.463493
Chr04	-0.0428161
Chr04	0.473281
Chr04	0.187916
Chr04	-0.181887
Chr04	-0.115539
Chr04	-0.0818607
Chr04	-0.411486
Chr04	-0.462869
Chr04	0.281487
Chr04	0.234352
Chr04	0.234352
Chr04	-1.15728
Chr04	-0.301892
Chr04	1.06564
Chr04	-0.304268
Chr04	0.265629
Chr04	0.409616
Chr04	-0.00124161
Chr04	-0.0504027
Chr04	0.188939
Chr04	-0.0708576
Chr04	-0.0825303
Chr04	0.693364
Chr04	1.48296
Chr04	-0.0364767
Chr04	0.19354
Chr04	0.167635
Chr04	-0.0565548
Chr04	-0.0600521
Chr04	-0.254592
Chr04	-0.00400553
Chr04	1.16912
Chr04	-0.35958
Chr04	0.146448
Chr04	-0.18899
Chr04	-0.18899
Chr04	-0.216944
Chr04	-0.0885548
Chr04	0.392294
Chr04	0.701229
Chr04	-0.348193
Chr04	0.210622
Chr04	0.103128
Chr04	-0.104813
Chr04	-1.1618
Chr04	-0.0294256
Chr04	-0.00167036
Chr04	0.222235
Chr04	-0.600875
Chr04	0.345649
Chr04	0.341838
Chr04	0.209032
Chr04	0.12124
Chr04	0.180967
Chr04	0.446953
Chr04	0.0507685
Chr04	0.148038
Chr04	0.148038
Chr04	-0.388727
Chr04	-0.0776549
Chr04	-0.0739649
Chr04	-0.256512
Chr04	0.208506
Chr04	0.0200594
Chr04	-0.0582183
Chr04	-0.304442
Chr04	0.324684
Chr04	0.415466
Chr04	0.420922
Chr04	-0.268586
Chr04	0.39572
Chr04	0.243934
Chr04	-0.289212
Chr04	0.168051
Chr04	-0.282808
Chr04	-0.286752
Chr04	-0.210886
Chr04	0.547695
Chr04	-0.0798029
Chr04	0.0941436
Chr04	1.34493
Chr04	-0.0321598
Chr04	0.0164963
Chr04	0.683803
Chr04	0.21049
Chr04	-0.0839924
Chr04	-0.100405
Chr04	0.149424
Chr04	-0.0995736
Chr04	-0.126991
Chr04	-0.0438384
Chr04	0.231092
Chr04	-0.0989217
Chr04	-0.0168258
Chr04	-0.259931
Chr04	0.092936
Chr04	0.705148
Chr04	-0.110105
Chr04	-0.110105
Chr04	-0.511375
Chr04	-0.0124471
Chr04	-0.333004
Chr04	0.0127008
Chr04	-0.128344
Chr04	-0.151307
Chr04	-0.307712
Chr04	-0.307712
Chr04	-0.307712
Chr04	-0.307712
Chr04	-0.307712
Chr04	-0.307712
Chr04	-0.285932
Chr04	0.398041
Chr04	0.110317
Chr04	0.110317
Chr04	-0.114081
Chr04	0.00765197
Chr04	0.261123
Chr04	0.219507
Chr04	-0.0279206
Chr04	0.265116
Chr04	0.265116
Chr04	0.687558
Chr04	0.122603
Chr04	-0.00826816
Chr04	-0.0276456
Chr04	0.309783
Chr04	-0.123237
Chr04	0.00355018
Chr04	-0.645105
Chr04	0.113476
Chr04	0.113476
Chr04	0.231722
Chr04	-0.201423
Chr04	0.452584
Chr04	-0.139697
Chr04	-0.131351
Chr04	-0.131351
Chr04	-0.14327
Chr04	-0.0423515
Chr04	-0.0423515
Chr04	0.173008
Chr04	0.206847
Chr04	0.148168
Chr04	0.148168
Chr04	0.172794
Chr04	1.23861
Chr04	-0.861718
Chr04	-0.0928503
Chr04	0.509887
Chr04	-0.246826
Chr04	-0.629542
Chr04	-0.0528184
Chr04	0.932884
Chr04	0.548474
Chr04	-0.100123
Chr04	-0.282288
Chr04	-0.282288
Chr04	-0.0756772
Chr04	-0.426531
Chr04	-0.426531
Chr04	0.303854
Chr04	0.40408
Chr04	0.12442
Chr04	-0.0198016
Chr04	-0.30665
Chr04	-0.0546629
Chr04	1.02632
Chr04	0.238083
Chr04	-0.123554
Chr04	-0.230213
Chr04	-0.319362
Chr04	0.194984
Chr04	0.137378
Chr04	0.29279
Chr04	0.29279
Chr04	0.29279
Chr04	0.29279
Chr04	0.135235
Chr04	0.135235
Chr04	0.465078
Chr04	0.465078
Chr04	0.199064
Chr04	0.518834
Chr04	-0.0194039
Chr04	0.156589
Chr04	0.165281
Chr04	0.0438334
Chr04	0.932747
Chr04	0.51403
Chr04	0.104328
Chr04	0.000894416
Chr04	0.311155
Chr04	0.14977
Chr04	0.498763
Chr04	-0.102009
Chr04	-0.0919197
Chr04	-0.259965
Chr04	0.185595
Chr04	-1.12532
Chr04	-0.0745706
Chr04	-0.243468
Chr04	0.631073
Chr04	0.310905
Chr04	-0.300356
Chr04	0.0630797
Chr04	0.494201
Chr04	-0.369086
Chr04	-0.369086
Chr04	0.514669
Chr04	0.230692
Chr04	0.264315
Chr04	-0.291636
Chr04	-0.0603982
Chr04	-0.0603982
Chr04	0.534249
Chr04	-0.114218
Chr04	-0.466052
Chr04	-0.466052
Chr04	-0.127996
Chr04	-0.127996
Chr04	-0.378218
Chr04	-0.378218
Chr04	0.0767123
Chr04	0.134016
Chr04	-0.275666
Chr04	-0.228792
Chr04	-0.0669098
Chr04	0.335291
Chr04	0.11372
Chr04	-0.199838
Chr04	-0.372085
Chr04	-0.496903
[truncated: 14,648 more rows]
