# Supplementary material for: Prophage-encoded Hm-oscar gene recapitulates Wolbachia-induced male-killing in the tea tortrix moth Homona magnanima
Source: eLife. 2025 Apr 14;13:RP101101. doi: 10.7554/eLife.101101 (PMC11996169; doi:10.7554/eLife.101101)
Supplement: Figure 3—source data 8. [file elife-101101-fig3-data8.xlsx]

## Sheet: Steel.Dwass Fig.3d-NSR
	comparison	t.value	p.value		Label	Comparison	Chr01	Chr02	Chr03	Chr04	Chr05	Chr06	Chr07	Chr08	Chr09	Chr10	Chr11	Chr12	Chr13	Chr14	Chr15	Chr16	Chr17	Chr18	Chr19	Chr20	Chr21	Chr22	Chr23	Chr24	Chr25	Chr26	Chr27	Chr28
1	Chr01:Chr02	0.160934	1		A	Chr01	NA	Yes	Yes	Yes	Yes	Yes	Yes	Yes	Yes	Yes	Yes	Yes	Yes	Yes	No	Yes	Yes	Yes	Yes	Yes	Yes	Yes	Yes	Yes	Yes	Yes	Yes	Yes
2	Chr01:Chr03	0.975465	1		DF	Chr02	Yes	NA	No	Yes	No	No	No	No	No	Yes	No	No	Yes	No	Yes	No	No	No	Yes	No	Yes	Yes	No	No	No	No	Yes	Yes
3	Chr01:Chr04	2.66902	0.619153		EFG	Chr03	Yes	No	NA	No	No	No	No	No	Yes	No	No	No	No	No	Yes	No	No	No	Yes	No	No	No	No	No	No	No	Yes	No
4	Chr01:Chr05	1.5266	0.999489		EH	Chr04	Yes	Yes	No	NA	No	No	No	No	Yes	No	No	No	No	No	Yes	No	No	No	Yes	No	No	No	No	No	No	No	Yes	No
5	Chr01:Chr06	0.623307	1		DGHI	Chr05	Yes	No	No	No	NA	No	No	No	No	Yes	No	No	No	No	Yes	No	No	No	Yes	No	No	Yes	No	No	No	No	Yes	No
6	Chr01:Chr07	2.53898	0.721538		CEFG	Chr06	Yes	No	No	No	No	NA	No	No	Yes	No	No	No	No	No	Yes	No	No	No	No	No	No	No	No	No	No	No	Yes	No
7	Chr01:Chr08	1.41243	0.999873		DE	Chr07	Yes	No	No	No	No	No	NA	No	No	No	No	No	No	No	Yes	No	No	No	Yes	No	No	No	No	No	No	No	Yes	No
8	Chr01:Chr09	2.05742	0.959919		DGHI	Chr08	Yes	No	No	No	No	No	No	NA	No	Yes	No	No	No	No	Yes	No	No	No	Yes	No	No	Yes	No	No	No	No	Yes	No
9	Chr01:Chr10	5.98943	7.88328e-07		D	Chr09	Yes	No	Yes	Yes	No	Yes	No	No	NA	Yes	Yes	Yes	Yes	No	Yes	No	Yes	Yes	Yes	No	Yes	Yes	No	No	No	No	Yes	Yes
10	Chr01:Chr11	1.30668	0.999971		E	Chr10	Yes	Yes	No	No	Yes	No	No	Yes	Yes	NA	No	No	No	Yes	Yes	No	No	No	Yes	No	No	No	Yes	No	Yes	No	Yes	No
11	Chr01:Chr12	2.04488	0.962675		EFG	Chr11	Yes	No	No	No	No	No	No	No	Yes	No	NA	No	No	No	Yes	No	No	No	Yes	No	No	No	No	No	No	No	Yes	No
12	Chr01:Chr13	1.74199	0.99565		EFG	Chr12	Yes	No	No	No	No	No	No	No	Yes	No	No	NA	No	No	Yes	No	No	No	Yes	No	No	No	No	No	No	No	Yes	No
13	Chr01:Chr14	2.71078	0.584868		CEI	Chr13	Yes	Yes	No	No	No	No	No	No	Yes	No	No	No	NA	No	Yes	No	No	No	No	No	No	No	No	No	Yes	No	Yes	No
14	Chr01:Chr15	0.749479	1		DGHI	Chr14	Yes	No	No	No	No	No	No	No	No	Yes	No	No	No	NA	Yes	No	No	No	Yes	No	No	Yes	No	No	No	No	Yes	No
15	Chr01:Chr16	0.716119	1		A	Chr15	No	Yes	Yes	Yes	Yes	Yes	Yes	Yes	Yes	Yes	Yes	Yes	Yes	Yes	NA	Yes	Yes	Yes	Yes	Yes	Yes	Yes	Yes	Yes	Yes	Yes	Yes	Yes
16	Chr01:Chr17	1.82953	0.991125		DE	Chr16	Yes	No	No	No	No	No	No	No	No	No	No	No	No	No	Yes	NA	No	No	Yes	No	No	No	No	No	No	No	Yes	No
17	Chr01:Chr18	1.22744	0.999992		EFG	Chr17	Yes	No	No	No	No	No	No	No	Yes	No	No	No	No	No	Yes	No	NA	No	Yes	No	No	No	No	No	No	No	Yes	No
18	Chr01:Chr19	5.6807	4.98012e-06		EFG	Chr18	Yes	No	No	No	No	No	No	No	Yes	No	No	No	No	No	Yes	No	No	NA	Yes	No	No	No	No	No	No	No	Yes	No
19	Chr01:Chr20	0.283447	1		C	Chr19	Yes	Yes	Yes	Yes	Yes	No	Yes	Yes	Yes	Yes	Yes	Yes	No	Yes	Yes	Yes	Yes	Yes	NA	Yes	Yes	No	Yes	Yes	Yes	No	Yes	No
20	Chr01:Chr21	1.90051	0.985066		DE	Chr20	Yes	No	No	No	No	No	No	No	No	No	No	No	No	No	Yes	No	No	No	Yes	NA	No	No	No	No	No	No	Yes	No
21	Chr01:Chr22	1.94158	0.980254		EI	Chr21	Yes	Yes	No	No	No	No	No	No	Yes	No	No	No	No	No	Yes	No	No	No	Yes	No	NA	No	No	No	Yes	No	Yes	No
22	Chr01:Chr23	1.81835	0.991861		CE	Chr22	Yes	Yes	No	No	Yes	No	No	Yes	Yes	No	No	No	No	Yes	Yes	No	No	No	No	No	No	NA	Yes	No	Yes	No	Yes	No
23	Chr01:Chr24	2.11487	0.945309		DGHI	Chr23	Yes	No	No	No	No	No	No	No	No	Yes	No	No	No	No	Yes	No	No	No	Yes	No	No	Yes	NA	No	No	No	Yes	No
24	Chr01:Chr25	4.72237	0.000798252		DE	Chr24	Yes	No	No	No	No	No	No	No	No	No	No	No	No	No	Yes	No	No	No	Yes	No	No	No	No	NA	No	No	Yes	No
25	Chr01:Chr26	0.521617	1		DGHJ	Chr25	Yes	No	No	No	No	No	No	No	No	Yes	No	No	Yes	No	Yes	No	No	No	Yes	No	Yes	Yes	No	No	NA	No	Yes	No
26	Chr01:Chr27	0.878081	1		CDE	Chr26	Yes	No	No	No	No	No	No	No	No	No	No	No	No	No	Yes	No	No	No	No	No	No	No	No	No	No	NA	Yes	No
27	Chr01:Chr28	1.13653	0.999998		B	Chr27	Yes	Yes	Yes	Yes	Yes	Yes	Yes	Yes	Yes	Yes	Yes	Yes	Yes	Yes	Yes	Yes	Yes	Yes	Yes	Yes	Yes	Yes	Yes	Yes	Yes	Yes	NA	Yes
28	Chr02:Chr15	0.166543	1		CEIJ	Chr28	Yes	Yes	No	No	No	No	No	No	Yes	No	No	No	No	No	Yes	No	No	No	No	No	No	No	No	No	No	No	Yes	NA
29	Chr03:Chr15	0.288081	1
30	Chr04:Chr15	1.95673	0.978196
31	Chr05:Chr15	0.803657	1
32	Chr06:Chr15	0.0214392	1
33	Chr07:Chr15	1.93783	0.980739
34	Chr08:Chr15	2.15455	0.933189
35	Chr09:Chr15	1.36672	0.999932
36	Chr10:Chr15	5.78159	2.7561e-06
37	Chr11:Chr15	0.597968	1
38	Chr12:Chr15	1.32514	0.999962
39	Chr13:Chr15	1.07852	0.999999
40	Chr14:Chr15	3.5438	0.0869124
41	Chr15:Chr16	1.38564	0.999912
42	Chr15:Chr17	1.32138	0.999964
43	Chr15:Chr18	0.471765	1
44	Chr15:Chr19	5.3124	3.94491e-05
45	Chr15:Chr20	1.01127	1
46	Chr15:Chr21	2.65395	0.631416
47	Chr15:Chr22	1.37254	0.999926
48	Chr15:Chr23	1.31015	0.99997
49	Chr15:Chr24	1.32431	0.999963
50	Chr15:Chr25	4.19577	0.00824129
51	Chr15:Chr26	0.00365455	1
52	Chr15:Chr27	1.40838	0.99988
53	Chr15:Chr28	0.613047	1
54	Chr10:Chr21	7.70052	5.281e-12
55	Chr10:Chr14	7.60562	1.08776e-11
56	Chr08:Chr10	7.18064	2.62251e-10
57	Chr10:Chr16	6.08446	4.3832e-07
58	Chr10:Chr27	7.0915	5.01198e-10
59	Chr10:Chr11	5.75837	3.16105e-06
60	Chr10:Chr20	5.61097	7.4503e-06
61	Chr05:Chr10	5.27465	4.83776e-05
62	Chr03:Chr10	4.94235	0.000272373
63	Chr06:Chr10	4.63396	0.00121016
64	Chr10:Chr18	4.53207	0.00193201
65	Chr10:Chr13	4.36981	0.00396206
66	Chr04:Chr10	4.33134	0.00467429
67	Chr10:Chr24	4.31863	0.00493466
68	Chr09:Chr10	4.23811	0.006922
69	Chr10:Chr26	4.19731	0.00818961
70	Chr10:Chr17	4.09433	0.012393
71	Chr10:Chr12	4.04697	0.0149201
72	Chr10:Chr23	3.94221	0.0222355
73	Chr10:Chr22	3.74077	0.0457263
74	Chr02:Chr10	3.38156	0.140283
75	Chr07:Chr14	4.79182	0.000571945
76	Chr04:Chr14	5.35259	3.16959e-05
77	Chr14:Chr25	6.89571	2.02337e-09
78	Chr14:Chr19	7.66973	6.67366e-12
79	Chr09:Chr14	4.66628	0.00104054
80	Chr14:Chr24	4.65311	0.00110675
81	Chr12:Chr14	4.59191	0.00147013
82	Chr13:Chr14	4.3939	0.00356881
83	Chr14:Chr17	4.35493	0.00422469
84	Chr14:Chr22	4.34778	0.00435647
85	Chr14:Chr23	4.32219	0.00486049
86	Chr11:Chr14	4.22217	0.00739386
87	Chr05:Chr14	4.12581	0.010936
88	Chr03:Chr14	3.60167	0.0724538
89	Chr14:Chr18	3.59105	0.0749451
90	Chr14:Chr28	3.10858	0.280737
91	Chr06:Chr14	3.06471	0.309513
92	Chr14:Chr26	2.76609	0.539161
93	Chr14:Chr20	2.25933	0.89245
94	Chr02:Chr14	2.18748	0.921782
95	Chr14:Chr16	1.97504	0.975487
96	Chr14:Chr27	1.62412	0.998549
97	Chr08:Chr14	1.48019	0.999703
98	Chr14:Chr21	1.04454	1
99	Chr19:Chr21	7.4339	4.00092e-11
100	Chr08:Chr19	6.98333	1.08861e-09
101	Chr19:Chr27	5.89686	1.38412e-06
102	Chr16:Chr19	5.80237	2.43679e-06
103	Chr19:Chr20	5.41903	2.19909e-05
104	Chr11:Chr19	5.09569	0.000124579
105	Chr05:Chr19	4.56144	0.0016905
106	Chr03:Chr19	4.50564	0.00217663
107	Chr06:Chr19	4.45569	0.0027204
108	Chr18:Chr19	4.10176	0.0120344
109	Chr13:Chr19	4.0628	0.014028
110	Chr19:Chr24	3.98304	0.0190699
111	Chr19:Chr26	3.93543	0.0228046
112	Chr09:Chr19	3.86189	0.0298633
113	Chr12:Chr19	3.79671	0.0376653
114	Chr04:Chr19	3.78803	0.0388284
115	Chr17:Chr19	3.68566	0.0550823
116	Chr19:Chr23	3.64779	0.0624184
117	Chr19:Chr22	3.5465	0.0861876
118	Chr21:Chr25	5.95695	9.6143e-07
119	Chr08:Chr25	5.82686	2.1063e-06
120	Chr25:Chr27	5.17534	8.21279e-05
121	Chr16:Chr25	4.74195	0.000727079
122	Chr20:Chr25	4.67938	0.000978422
123	Chr11:Chr25	4.09952	0.0121415
124	Chr05:Chr25	3.73389	0.0468129
125	Chr03:Chr25	3.72456	0.0483234
126	Chr04:Chr21	4.42306	0.00314165
127	Chr04:Chr08	4.16925	0.00918159
128	Chr04:Chr27	3.92093	0.024066
129	Chr07:Chr21	3.90369	0.0256449
130	Chr09:Chr21	3.83577	0.0328006
131	Chr21:Chr24	3.76581	0.0419501
132	Chr12:Chr21	3.72784	0.0477881
133	Chr07:Chr08	3.76181	0.0425343
134	Chr21:Chr22	3.61307	0.069855
135	Chr17:Chr21	3.5826	0.0769796
136	Chr07:Chr27	3.57556	0.0787085
137	Chr06:Chr25	3.55652	0.0835447
138	Chr18:Chr25	3.55067	0.0850811
139	Chr21:Chr23	3.5498	0.085311
140	Chr24:Chr27	3.54192	0.0874198
141	Chr11:Chr21	3.52442	0.0922531
142	Chr05:Chr21	3.50988	0.0964341
143	Chr08:Chr24	3.46173	0.111382
144	Chr13:Chr21	3.45817	0.112557
145	Chr02:Chr19	3.45797	0.112622
146	Chr08:Chr09	3.4485	0.115798
147	Chr08:Chr12	3.40668	0.130666
148	Chr10:Chr28	3.23714	0.206208
149	Chr04:Chr16	3.20149	0.225376
150	Chr25:Chr26	3.18804	0.232907
151	Chr08:Chr17	3.18786	0.233007
152	Chr08:Chr22	3.16746	0.24475
153	Chr08:Chr13	3.15362	0.252933
154	Chr08:Chr23	3.10615	0.28229
155	Chr12:Chr27	3.08511	0.295928
156	Chr13:Chr25	3.0663	0.308446
157	Chr09:Chr27	3.06155	0.311649
158	Chr05:Chr08	3.04903	0.320192
159	Chr24:Chr25	3.04902	0.320199
160	Chr08:Chr11	2.98618	0.364893
161	Chr07:Chr16	2.9783	0.370699
162	Chr19:Chr28	2.97596	0.372438
163	Chr04:Chr25	2.94629	0.394727
164	Chr07:Chr10	2.88525	0.442205
165	Chr04:Chr20	2.88355	0.443558
166	Chr09:Chr25	2.87658	0.449099
167	Chr18:Chr21	2.83233	0.484771
168	Chr12:Chr25	2.8012	0.510225
169	Chr07:Chr20	2.79704	0.513643
170	Chr16:Chr24	2.69751	0.595796
171	Chr03:Chr21	2.68131	0.609101
172	Chr09:Chr16	2.67876	0.61119
173	Chr07:Chr19	2.67787	0.611915
174	Chr12:Chr16	2.64924	0.635234
175	Chr22:Chr27	2.60914	0.667384
176	Chr17:Chr25	2.56963	0.69826
177	Chr25:Chr28	2.56841	0.6992
178	Chr18:Chr27	2.56154	0.70447
179	Chr23:Chr25	2.54383	0.717898
180	Chr08:Chr18	2.52991	0.728299
181	Chr13:Chr27	2.50665	0.745332
182	Chr23:Chr27	2.4593	0.778554
183	Chr16:Chr22	2.44749	0.786507
184	Chr22:Chr25	2.41881	0.805243
185	Chr21:Chr28	2.40957	0.811092
186	Chr16:Chr17	2.40202	0.815805
187	Chr03:Chr08	2.32169	0.86193
188	Chr13:Chr16	2.31525	0.8653
189	Chr16:Chr23	2.31445	0.865713
190	Chr17:Chr27	2.30521	0.870453
191	Chr02:Chr25	2.30159	0.872279
192	Chr11:Chr27	2.30117	0.872491
193	Chr05:Chr27	2.2963	0.874925
194	Chr20:Chr24	2.26209	0.891198
195	Chr05:Chr16	2.25935	0.892441
196	Chr09:Chr20	2.22647	0.906632
197	Chr08:Chr28	2.21837	0.909928
198	Chr12:Chr20	2.19464	0.919134
199	Chr06:Chr21	2.15441	0.933234
200	Chr20:Chr22	2.06414	0.95838
201	Chr11:Chr16	2.04884	0.961821
202	Chr20:Chr23	2.00694	0.970147
203	Chr13:Chr20	1.99092	0.97293
204	Chr21:Chr26	1.97392	0.97566
205	Chr17:Chr20	1.97211	0.975938
206	Chr27:Chr28	1.96735	0.976656
207	Chr03:Chr27	1.88016	0.987071
208	Chr16:Chr18	1.8793	0.987151
209	Chr07:Chr25	1.8556	0.989194
210	Chr06:Chr08	1.79946	0.992989
211	Chr05:Chr20	1.7023	0.996939
212	Chr06:Chr07	1.69204	0.997213
213	Chr08:Chr26	1.69139	0.997229
214	Chr07:Chr11	1.64955	0.998135
215	Chr03:Chr07	1.6273	0.998502
216	Chr07:Chr26	1.62592	0.998523
217	Chr04:Chr11	1.62168	0.998584
218	Chr16:Chr28	1.60568	0.998797
219	Chr03:Chr16	1.60079	0.998856
220	Chr04:Chr06	1.59899	0.998877
221	Chr21:Chr27	1.58013	0.999079
222	Chr11:Chr20	1.57417	0.999136
223	Chr03:Chr04	1.54561	0.999367
224	Chr04:Chr26	1.51466	0.999554
225	Chr07:Chr18	1.49599	0.999641
226	Chr06:Chr27	1.46697	0.999747
227	Chr18:Chr20	1.46127	0.999764
228	Chr20:Chr21	1.45149	0.999791
229	Chr02:Chr21	1.41821	0.999864
230	Chr05:Chr07	1.40503	0.999885
231	Chr04:Chr18	1.40324	0.999888
232	Chr20:Chr28	1.38998	0.999906
233	Chr04:Chr05	1.32543	0.999962
234	Chr02:Chr07	1.31683	0.999967
235	Chr03:Chr20	1.21131	0.999994
236	Chr16:Chr21	1.1936	0.999995
237	Chr02:Chr04	1.1872	0.999996
238	Chr06:Chr12	1.17529	0.999997
239	Chr06:Chr22	1.17199	0.999997
240	Chr06:Chr09	1.14649	0.999998
241	Chr10:Chr25	1.14589	0.999998
242	Chr02:Chr12	1.13512	0.999998
243	Chr06:Chr16	1.11833	0.999999
244	Chr06:Chr23	1.10726	0.999999
245	Chr02:Chr09	1.10103	0.999999
246	Chr06:Chr24	1.09991	0.999999
247	Chr16:Chr26	1.08198	0.999999
248	Chr06:Chr17	1.08079	0.999999
249	Chr12:Chr26	1.07381	1
250	Chr09:Chr26	1.07011	1
251	Chr22:Chr26	1.05995	1
252	Chr17:Chr26	1.05635	1
253	Chr24:Chr26	1.05456	1
254	Chr08:Chr20	1.05178	1
255	Chr23:Chr26	1.04147	1
256	Chr02:Chr22	1.03044	1
257	Chr19:Chr25	1.02418	1
258	Chr02:Chr24	1.01522	1
259	Chr02:Chr17	0.998739	1
260	Chr07:Chr13	0.993282	1
261	Chr02:Chr23	0.971037	1
262	Chr03:Chr22	0.970713	1
263	Chr02:Chr08	0.951254	1
264	Chr03:Chr12	0.945868	1
265	Chr03:Chr09	0.945606	1
266	Chr07:Chr28	0.945251	1
267	Chr07:Chr24	0.940126	1
268	Chr26:Chr27	0.931791	1
269	Chr03:Chr24	0.930534	1
270	Chr03:Chr17	0.92253	1
271	Chr06:Chr13	0.913756	1
272	Chr20:Chr27	0.909327	1
273	Chr03:Chr23	0.899744	1
274	Chr11:Chr22	0.897796	1
275	Chr06:Chr20	0.891447	1
276	Chr11:Chr12	0.883814	1
277	Chr09:Chr11	0.877036	1
278	Chr11:Chr23	0.872053	1
279	Chr11:Chr17	0.850068	1
280	Chr13:Chr26	0.844854	1
281	Chr07:Chr09	0.830153	1
282	Chr11:Chr24	0.821531	1
283	Chr07:Chr12	0.81171	1
284	Chr02:Chr05	0.79158	1
285	Chr02:Chr13	0.774345	1
286	Chr18:Chr24	0.771163	1
287	Chr20:Chr26	0.764484	1
288	Chr18:Chr22	0.754937	1
289	Chr05:Chr24	0.754493	1
290	Chr09:Chr18	0.744371	1
291	Chr04:Chr13	0.739029	1
292	Chr18:Chr23	0.724438	1
293	Chr04:Chr28	0.72088	1
294	Chr12:Chr18	0.720192	1
295	Chr03:Chr13	0.715969	1
296	Chr08:Chr21	0.703606	1
297	Chr07:Chr17	0.700394	1
298	Chr05:Chr22	0.682598	1
299	Chr02:Chr11	0.674552	1
300	Chr04:Chr24	0.668408	1
301	Chr05:Chr09	0.655212	1
302	Chr08:Chr27	0.645203	1
303	Chr05:Chr26	0.637776	1
304	Chr17:Chr18	0.630165	1
305	Chr07:Chr22	0.620115	1
306	Chr04:Chr09	0.615339	1
307	Chr11:Chr13	0.612393	1
308	Chr05:Chr12	0.61003	1
309	Chr05:Chr06	0.607747	1
310	Chr02:Chr28	0.605424	1
311	Chr07:Chr23	0.602682	1
312	Chr02:Chr03	0.419124	1
313	Chr02:Chr06	0.124877	1
314	Chr02:Chr16	0.476231	1
315	Chr02:Chr18	0.565024	1
316	Chr02:Chr20	0.306228	1
317	Chr02:Chr26	0.14389	1
318	Chr02:Chr27	0.124822	1
319	Chr03:Chr05	0.415464	1
320	Chr03:Chr06	0.214602	1
321	Chr03:Chr11	0.167609	1
322	Chr03:Chr18	0.196177	1
323	Chr03:Chr26	0.242976	1
324	Chr03:Chr28	0.388553	1
325	Chr04:Chr07	0.400888	1
326	Chr04:Chr12	0.592162	1
327	Chr04:Chr17	0.388275	1
328	Chr04:Chr22	0.320439	1
329	Chr04:Chr23	0.328098	1
330	Chr05:Chr11	0.281283	1
331	Chr05:Chr13	0.325344	1
332	Chr05:Chr17	0.526883	1
333	Chr05:Chr18	0.100169	1
334	Chr05:Chr23	0.581018	1
335	Chr05:Chr28	0.165147	1
336	Chr06:Chr11	0.44534	1
337	Chr06:Chr18	0.350686	1
338	Chr06:Chr26	0.0484176	1
339	Chr06:Chr28	0.493524	1
340	Chr08:Chr16	0.58192	1
341	Chr09:Chr12	0.0280246	1
342	Chr09:Chr13	0.204645	1
343	Chr09:Chr17	0.0409887	1
344	Chr09:Chr22	0.0657329	1
345	Chr09:Chr23	0.0651313	1
346	Chr09:Chr24	0.0573506	1
347	Chr09:Chr28	0.364553	1
348	Chr10:Chr19	0.420233	1
349	Chr11:Chr18	0.0454584	1
350	Chr11:Chr26	0.465181	1
351	Chr11:Chr28	0.297695	1
352	Chr12:Chr13	0.235437	1
353	Chr12:Chr17	0.0186998	1
354	Chr12:Chr22	0.0630472	1
355	Chr12:Chr23	0.00715824	1
356	Chr12:Chr24	0.0482607	1
357	Chr12:Chr28	0.363825	1
358	Chr13:Chr17	0.342307	1
359	Chr13:Chr18	0.557128	1
360	Chr13:Chr22	0.33996	1
361	Chr13:Chr23	0.35097	1
362	Chr13:Chr24	0.0744226	1
363	Chr13:Chr28	0.146776	1
364	Chr16:Chr20	0.490841	1
365	Chr16:Chr27	0.374469	1
366	Chr17:Chr22	0.0925726	1
367	Chr17:Chr23	0.0269476	1
368	Chr17:Chr24	0.0109727	1
369	Chr17:Chr28	0.293923	1
370	Chr18:Chr26	0.480811	1
371	Chr18:Chr28	0.26655	1
372	Chr22:Chr23	0.0689898	1
373	Chr22:Chr24	0.145267	1
374	Chr22:Chr28	0.429042	1
375	Chr23:Chr24	0.138417	1
376	Chr23:Chr28	0.34253	1
377	Chr24:Chr28	0.339082	1
378	Chr26:Chr28	0.573497	1
