# Supplementary material for: Prophage-encoded Hm-oscar gene recapitulates Wolbachia-induced male-killing in the tea tortrix moth Homona magnanima
Source: eLife. 2025 Apr 14;13:RP101101. doi: 10.7554/eLife.101101 (PMC11996169; doi:10.7554/eLife.101101)
Supplement: Figure 3—source data 9. [file elife-101101-fig3-data9.xlsx]

## Sheet: Sheet1
Fig.3e
Line	Sex strain	tpi	ef1a	tpi-ef	5.13786	2^ddct
HmOscar	F	21.96	17.13	4.83	-0.307857	1.23787
HmOscar	F	21.08	15.95	5.13	-0.00785714	1.00546
HmOscar	F	20.51	15.36	5.15	0.0121429	0.991619
HmOscar	F	24.46	18.46	6	0.862143	0.550135
HmOscar	F	24.99	17.29	7.7	2.56214	0.169324
HmOscar	F	20.54	15.86	4.68	-0.457857	1.3735
HmOscar	F	23.19	17.63	5.56	0.422143	0.746315
HmOscar	F	24.49	18.19	6.3	1.16214	0.446848
HmOscar	F	21.7	17.01	4.69	-0.447857	1.36401
HmOscar	F	20.15	15.45	4.7	-0.437857	1.35459
HmOscar	F	19.9	15.18	4.72	-0.417857	1.33594
HmOscar	F	21.26	16.48	4.78	-0.357857	1.28152
HmOscar	F	20.58	15.6	4.98	-0.157857	1.11563
HmOscar	F	21.83	16.74	5.09	-0.0478571	1.03373
HmOscar	F	20.57	15.42	5.15	0.0121429	0.991619
HmOscar	F	23.28	17.57	5.71	0.572143	0.672617
HmOscar	F	21.46	15.56	5.9	0.762143	0.58962
HmOscar	F	24.27	18.31	5.96	0.822143	0.565601
HmOscar	F	22.58	16.36	6.22	1.08214	0.472327
HmOscar	F	22	16.83	5.17	0.0321429	0.977967
HmOscar	F	22.18	17.14	5.04	-0.0978571	1.07018
HmOscar	F	19.74	14.86	4.88	-0.257857	1.1957
HmOscar	F	19.53	14.56	4.97	-0.167857	1.12339
HmOscar	F	22.85	17.45	5.4	0.262143	0.833848
HmOscar	F	20.79	15.62	5.17	0.0321429	0.977967
HmOscar	F	21.74	17.63	4.11	-1.02786	2.03899
HmOscar	F	21.81	16.51	5.3	0.162143	0.893697
HmOscar	F	22.36	17.36	5	-0.137857	1.10027
HmOscar	F	21.72	17.63	4.09	-1.04786	2.06746
HmOscar	F	24.19	19.69	4.5	-0.637857	1.55602
HmOscar	F	21.9	16.93	4.97	-0.167857	1.12339
HmOscar	F	22.99	18.05	4.94	-0.197857	1.14699
HmOscar	F	20.8	16.36	4.44	-0.697857	1.62209
HmOscar	F	21.7	16.95	4.75	-0.387857	1.30845
HmOscar	F	23.05	17.43	5.62	0.482143	0.715913
HmOscar	F	22.29	18.07	4.22	-0.917857	1.88931
HmOscar	F	22.99	18.18	4.81	-0.327857	1.25515
HmOscar	F	22.54	17.88	4.66	-0.477857	1.39267
HmOscar	F	21.26	16.25	5.01	-0.127857	1.09267
HmOscar	F	23.57	17.91	5.66	0.522143	0.696337
HmOscar	F	22.2	17.15	5.05	-0.0878571	1.06279
HmOscar	F	23.14	18.36	4.78	-0.357857	1.28152
HmOscar	M	19.57	15.95	3.62	-1.51786	2.86365
HmOscar	M	19.33	14.88	4.45	-0.687857	1.61089
HmOscar	M	19.89	15.8	4.09	-1.04786	2.06746
HmOscar	M	21	16.23	4.77	-0.367857	1.29043
HmOscar	M	20.31	15.79	4.52	-0.617857	1.53459
HmOscar	M	20.82	15.91	4.91	-0.227857	1.17109
HmOscar	M	20.71	15.57	5.14	0.00214286	0.998516
HmOscar	M	20.28	15.54	4.74	-0.397857	1.31755
HmOscar	M	18.95	15.46	3.49	-1.64786	3.13368
HmOscar	M	21.97	17.27	4.7	-0.437857	1.35459
HmOscar	M	19.1	15.21	3.89	-1.24786	2.37488
HmOscar	M	19.42	15.01	4.41	-0.727857	1.65618
HmOscar	M	20.3	15.8	4.5	-0.637857	1.55602
HmOscar	M	18.69	14.63	4.06	-1.07786	2.1109
HmOscar	M	19.2	15.19	4.01	-1.12786	2.18534
HmOscar	M	22.55	18.74	3.81	-1.32786	2.5103
HmOscar	M	22.37	18.84	3.53	-1.60786	3.04799
HmOscar	M	24.2	19.83	4.37	-0.767857	1.70274
HmOscar	M	23.82	19.4	4.42	-0.717857	1.64474
HmOscar	M	22.57	18.53	4.04	-1.09786	2.14037
HmOscar	M	22.49	18.82	3.67	-1.46786	2.76611
HmOscar	M	24.22	19.29	4.93	-0.207857	1.15497
HmOscar	M	24.84	19.7	5.14	0.00214286	0.998516
HmOscar	M	23.23	18.55	4.68	-0.457857	1.3735
HmOscar	M	23.68	19.36	4.32	-0.817857	1.76279
HmOscar	M	24.82	19.48	5.34	0.202143	0.869258
HmOscar	M	23.31	19.18	4.13	-1.00786	2.01092
HmOscar	M	22.72	19.07	3.65	-1.48786	2.80472
Line	Sex strain	tpi	ef1a	tpi-ef	3.87	2^ddct
GFP	F	20.61	16.78	3.83	-0.04	1.02811
GFP	F	19.79	16	3.79	-0.08	1.05702
GFP	F	19.49	16.02	3.47	-0.4	1.31951
GFP	F	19.09	16.17	2.92	-0.95	1.93187
GFP	F	19.32	15.79	3.53	-0.34	1.26576
GFP	F	22.34	17.69	4.65	0.78	0.582367
GFP	F	19.92	16.16	3.76	-0.11	1.07923
GFP	F	20.63	16.67	3.96	0.09	0.939523
GFP	F	22.23	17.72	4.51	0.64	0.641713
GFP	F	20.02	16.58	3.44	-0.43	1.34723
GFP	F	20.78	16.71	4.07	0.2	0.870551
GFP	F	21.68	17.37	4.31	0.44	0.737135
GFP	F	20.61	16.54	4.07	0.2	0.870551
GFP	M	19.93	15.65	4.28	0.41	0.752623
GFP	M	23.26	19.87	3.39	-0.48	1.39474
GFP	M	23.07	18.47	4.6	0.73	0.602904
GFP	M	20.55	17.02	3.53	-0.34	1.26576
GFP	M	23.83	19.24	4.59	0.72	0.607097
GFP	M	22.72	17.99	4.73	0.86	0.550953
GFP	M	21.63	18.38	3.25	-0.62	1.53688
GFP	M	20.1	16.84	3.26	-0.61	1.52626
GFP	M	21.71	17.61	4.1	0.23	0.852635
GFP	M	21.54	17.68	3.86	-0.01	1.00696
GFP	M	23.09	19.58	3.51	-0.36	1.28343
GFP	M	23.35	19.33	4.02	0.15	0.90125
GFP	M	23.89	19.53	4.36	0.49	0.712025
Line	Sex strain	tpi	ef1a	tpi-ef	5.12318	2^ddct
Wolbachia	F	19.83	15.66	4.17	-0.953182	1.93614
Wolbachia	F	18.72	14.72	4	-1.12318	2.17827
Wolbachia	F	20.56	15.28	5.28	0.156818	0.897001
Wolbachia	F	19.67	14.3	5.37	0.246818	0.842753
Wolbachia	F	20.15	14.35	5.8	0.676818	0.625543
Wolbachia	F	19.5	13.79	5.71	0.586818	0.66581
Wolbachia	F	19.63	14.04	5.59	0.466818	0.723559
Wolbachia	F	20.09	14.84	5.25	0.126818	0.915849
Wolbachia	F	19.89	15.68	4.21	-0.913182	1.88319
Wolbachia	F	19.2	14.74	4.46	-0.663182	1.58357
Wolbachia	F	21.07	15.38	5.69	0.566818	0.675104
Wolbachia	F	19.55	14.36	5.19	0.0668182	0.954741
Wolbachia	F	20	14.5	5.5	0.376818	0.770134
Wolbachia	F	19.25	13.81	5.44	0.316818	0.802839
Wolbachia	F	19.36	13.97	5.39	0.266818	0.831151
Wolbachia	F	20.21	14.69	5.52	0.396818	0.759532
Wolbachia	F	19.22	13.8	5.42	0.296818	0.814046
Wolbachia	F	20.03	14.46	5.57	0.446818	0.733659
Wolbachia	F	24.69	20.02	4.67	-0.453182	1.36906
Wolbachia	F	21.55	16.27	5.28	0.156818	0.897001
Wolbachia	F	19.42	14.57	4.85	-0.273182	1.20847
Wolbachia	F	18.46	14.11	4.35	-0.773182	1.70903
Wolbachia	M	18.03	13.68	4.35	-0.773182	1.70903
Wolbachia	M	18.57	14.35	4.22	-0.903182	1.87019
Wolbachia	M	19.38	14.98	4.4	-0.723182	1.65082
Wolbachia	M	23.72	20.15	3.57	-1.55318	2.93464
Wolbachia	M	20.59	17.25	3.34	-1.78318	3.44184
Wolbachia	M	19.3	15.68	3.62	-1.50318	2.83467
Wolbachia	M	20.19	16.08	4.11	-1.01318	2.01836
Wolbachia	M	18.82	14.79	4.03	-1.09318	2.13344
Wolbachia	M	19.81	16.27	3.54	-1.58318	2.9963
Wolbachia	M	19.27	14.88	4.39	-0.733182	1.6623
Wolbachia	M	18.37	14.33	4.04	-1.08318	2.1187
Wolbachia	M	18.82	14.67	4.15	-0.973182	1.96317
Wolbachia	M	19.15	14.58	4.57	-0.553182	1.46732
Wolbachia	M	19.27	14.47	4.8	-0.323182	1.25109
Wolbachia	M	20.25	15.31	4.94	-0.183182	1.13539
Wolbachia	M	19.24	15.9	3.34	-1.78318	3.44184
Wolbachia	M	19.23	14.6	4.63	-0.493182	1.40755
Wolbachia	M	18.05	14.45	3.6	-1.52318	2.87424
Wolbachia	M	18.68	14.38	4.3	-0.823182	1.7693
Wolbachia	M	19.27	14.41	4.86	-0.263182	1.20012
Wolbachia	M	19.28	14.49	4.79	-0.333182	1.25979
Wolbachia	M	20.44	15.38	5.06	-0.0631818	1.04477
Line	Sex strain	tpi	ef1a	tpi-ef	3.8275	2^ddct
NSR	F	20.82	17.29	3.53	-0.2975	1.22901
NSR	F	23.17	17.94	5.23	1.4025	0.378273
NSR	F	20.26	17.08	3.18	-0.6475	1.56645
NSR	F	20.57	17.16	3.41	-0.4175	1.33561
NSR	F	20.65	17.39	3.26	-0.5675	1.48195
NSR	F	21.21	17.93	3.28	-0.5475	1.46155
NSR	F	21.17	17.34	3.83	0.0025	0.998269
NSR	F	22.59	17.9	4.69	0.8625	0.549999
NSR	F	23.7	20.28	3.42	-0.4075	1.32639
NSR	F	19.16	14.68	4.48	0.6525	0.636177
NSR	F	20.11	16.25	3.86	0.0325	0.977725
NSR	F	19.08	14.94	4.14	0.3125	0.805245
NSR	F	23.45	20.19	3.26	-0.5675	1.48195
NSR	F	18.63	14.7	3.93	0.1025	0.931418
NSR	F	20.17	16.14	4.03	0.2025	0.869043
NSR	F	18.6	14.89	3.71	-0.1175	1.08485
NSR	M	21.16	17.47	3.69	-0.1375	1.1
NSR	M	21	17.17	3.83	0.0025	0.998269
NSR	M	20.34	16.82	3.52	-0.3075	1.23756
NSR	M	20.57	16.45	4.12	0.2925	0.816486
NSR	M	20	17.22	2.78	-1.0475	2.06694
NSR	M	20.01	17.04	2.97	-0.8575	1.8119
NSR	M	20.99	18.04	2.95	-0.8775	1.83719
NSR	M	19.21	14.97	4.24	0.4125	0.75132
NSR	M	18.74	14.74	4	0.1725	0.887304
NSR	M	22.92	19.19	3.73	-0.0975	1.06992
NSR	M	18.95	14.91	4.04	0.2125	0.86304
NSR	M	19	14.86	4.14	0.3125	0.805245
NSR	M	18.49	14.63	3.86	0.0325	0.977725
NSR	M	22.94	19.42	3.52	-0.3075	1.23756
NSR	M	18.82	14.87	3.95	0.1225	0.918594
