# Supplementary material for: Prophage-encoded Hm-oscar gene recapitulates Wolbachia-induced male-killing in the tea tortrix moth Homona magnanima
Source: eLife. 2025 Apr 14;13:RP101101. doi: 10.7554/eLife.101101 (PMC11996169; doi:10.7554/eLife.101101)
Supplement: Figure 3—source data 10. [file elife-101101-fig3-data10.xlsx]

## Sheet: Steel.Dwass Fig.3e
	comparison	t.value	p.value
1	1.HmOscar-F:1.HmOscar-M	4.9036	2.58363e-05
2	1.HmOscar-M:2.GFP-F	3.78257	0.00387134
3	1.HmOscar-M:2.GFP-M	3.92249	0.00223236
4	1.HmOscar-M:3.Wol-F	4.16309	0.00082293
5	1.HmOscar-M:3.Wol-M	0.684076	0.997422
6	1.HmOscar-M:4.NSR-F	3.92827	0.00218111
7	1.HmOscar-M:4.NSR-M	3.59328	0.00786523
8	1.HmOscar-F:3.Wol-M	4.94756	2.06649e-05
9	3.Wol-F:3.Wol-M	4.16683	0.000809843
10	3.Wol-M:4.NSR-F	3.9918	0.00168572
11	2.GFP-F:3.Wol-M	3.89244	0.00251727
12	2.GFP-M:3.Wol-M	3.89217	0.00252
13	3.Wol-M:4.NSR-M	3.74351	0.00449649
14	3.Wol-F:4.NSR-M	1.36128	0.874757
15	2.GFP-M:4.NSR-M	0.944469	0.981651
16	1.HmOscar-F:3.Wol-F	0.791609	0.993592
17	1.HmOscar-F:2.GFP-F	0.594375	0.998954
18	2.GFP-M:4.NSR-F	0.570158	0.999203
19	3.Wol-F:4.NSR-F	0.561808	0.999276
20	1.HmOscar-F:2.GFP-M	0.55474	0.999334
21	2.GFP-M:3.Wol-F	0.443844	0.999849
22	2.GFP-F:2.GFP-M	0.410397	0.999911
23	2.GFP-F:3.Wol-F	0.409731	0.999912
24	2.GFP-F:4.NSR-M	0.391663	0.999935
25	2.GFP-F:4.NSR-F	0.35091	0.999969
26	1.HmOscar-F:4.NSR-M	0.181235	1
27	4.NSR-F:4.NSR-M	0.138419	1
28	1.HmOscar-F:4.NSR-F	0.0869928	1
