# Supplementary material for: Prophage-encoded Hm-oscar gene recapitulates Wolbachia-induced male-killing in the tea tortrix moth Homona magnanima
Source: eLife. 2025 Apr 14;13:RP101101. doi: 10.7554/eLife.101101 (PMC11996169; doi:10.7554/eLife.101101)
Supplement: Figure 4—source data 1. [file elife-101101-fig4-data1.xlsx]

## Sheet: source data Fig.4
Fig.4a
Treat	IMP-M/rp raw data	0.000373188	IMP exp (Hmmasc-adj=100)
pIZ	4.84194e-07	0.00129745	0.129745
pIZ	2.43208e-06	0.00651705	0.651705
pIZ	5.3122e-07	0.00142347	0.142347
HmMasc	0.000170294	0.456322	45.6322
HmMasc	0.000447272	1.19852	119.852
HmMasc	0.000501998	1.34516	134.516
HmMasc+HmOscar	2.43648e-05	0.0652883	6.52883
HmMasc+HmOscar	4.19059e-05	0.112292	11.2292
HmMasc+HmOscar	6.70626e-05	0.179702	17.9702
HmMasc+Oscar	9.10383e-05	0.243948	24.3948
HmMasc+Oscar	0.000247805	0.664021	66.4021
HmMasc+Oscar	0.000277351	0.743193	74.3193
