# Supplementary material for: Prophage-encoded Hm-oscar gene recapitulates Wolbachia-induced male-killing in the tea tortrix moth Homona magnanima
Source: eLife. 2025 Apr 14;13:RP101101. doi: 10.7554/eLife.101101 (PMC11996169; doi:10.7554/eLife.101101)
Supplement: Figure 4—source data 2. [file elife-101101-fig4-data2.xlsx]

## Sheet: Sheet1
Fig.4b
Treat	IMP-M/rp raw data	0.00195222	IMP exp (Hmmasc-adj=100)
HmMasc+pIZ	0.00170517	0.873448	87.3448
HmMasc+pIZ	0.00249637	1.27873	127.873
HmMasc+pIZ	0.00165514	0.847821	84.7821
HmMasc+HmOscar	0.000163315	0.083656	8.3656
HmMasc+HmOscar	0.000234422	0.120079	12.0079
HmMasc+HmOscar	0.000286457	0.146734	14.6734
OfMasc+pIZ	0.00069198	0.354457	35.4457
OfMasc+pIZ	0.00126424	0.647588	64.7588
OfMasc+pIZ	0.000923593	0.473098	47.3098
OfMasc+HmOscar	5.25898e-05	0.0269384	2.69384
OfMasc+HmOscar	9.48684e-05	0.0485951	4.85951
OfMasc+HmOscar	7.37655e-05	0.0377854	3.77854
BmMasc+pIZ	0.000816352	0.418165	41.8165
BmMasc+pIZ	0.00147866	0.757421	75.7421
BmMasc+pIZ	0.000710819	0.364107	36.4107
BmMasc+HmOscar	2.37771e-05	0.0121795	1.21795
BmMasc+HmOscar	3.47291e-05	0.0177895	1.77895
BmMasc+HmOscar	3.01842e-05	0.0154615	1.54615
PmMasc+pIZ	0.000585727	0.30003	30.003
PmMasc+pIZ	0.00113273	0.580223	58.0223
PmMasc+pIZ	0.000718052	0.367812	36.7812
PmMasc+HmOscar	0.00017336	0.0888014	8.88014
PmMasc+HmOscar	0.000237655	0.121736	12.1736
PmMasc+HmOscar	1.43196e-05	0.007335	0.7335
TvMasc+pIZ	0.000637339	0.326468	32.6468
TvMasc+pIZ	0.000823704	0.421931	42.1931
TvMasc+pIZ	0.000510651	0.261574	26.1574
TvMasc+HmOscar	3.86681e-05	0.0198072	1.98072
TvMasc+HmOscar	0.000109894	0.0562918	5.62918
TvMasc+HmOscar	4.85453e-05	0.0248667	2.48667
SfMasc+pIZ	0.000527051	0.269975	26.9975
SfMasc+pIZ	0.000862332	0.441718	44.1718
SfMasc+pIZ	0.000349651	0.179104	17.9104
SfMasc+HmOscar	4.44948e-06	0.00227918	0.227918
SfMasc+HmOscar	1.41447e-05	0.00724541	0.724541
SfMasc+HmOscar	3.28105e-06	0.00168067	0.168067
