# Supplementary material for: Prophage-encoded Hm-oscar gene recapitulates Wolbachia-induced male-killing in the tea tortrix moth Homona magnanima
Source: eLife. 2025 Apr 14;13:RP101101. doi: 10.7554/eLife.101101 (PMC11996169; doi:10.7554/eLife.101101)
Supplement: Figure 4—source data 3. [file elife-101101-fig4-data3.xlsx]

## Sheet: Sheet1
Fig.4c
	BmMasc	TvMasc	OfMasc	SfMasc	HmMasc	PmMasc	Aligned amino acid sequences	Nucleotide accession No.	Nucleotide sequences
BmMasc	100	58.36	24.43	29.09	27.6	27.81	------------------------------MTSAKVATQLMNNNNAQNGRQQPISR-LTAPPTDPRMKITASSSEQKKKPKELCRNFLWGTCTKGTECIHLHKLDLKVLKETVKFCRDFQNKVTCSRPGCTFLHVSDEEQKLFEKEGKIPRLLAERYAALKDSPTAKMVVEKSQKTGSMFNVGDYLTKPP-------PPPPPVAS-VAGPSIPVSHPS-------------------------CSSLQSMLALPPPPPPPLPPLPKAPLP----QPTKAVTITTTSTTAVASTSTQKLTPAKPVPNTTVSTTGLHILNQPPPPGFDASKPPPPLP-QMNGA----IKRPAFDSCKAGQRKMAKLDDANSLESDCNNCVQRELRIELYKQEMKDLEKEQE…	>XM_038013699.2 PREDICTED: Bombyx mori uncharacterized LOC101739895 (LOC101739895), transcript variant X1, mRNA	AATCTACGGCATAGATACCATAGATTATACACATAATATTTGAGAATTTTGAGATATACACATTACAGTTCTGCAGGCATTGCCTTGTTATTACGAGGTCTTTTCTTTACCCACAATTTGTCGGTTATAAAAATAAATTGATCATAAGTGAGGAATAATTAAAATAAAATTACTCGGAATGCTATAATTTTTTGTGGCTGACTTGGCCGTTTTAGTCTTAGAGTTTCTAAATCAAACTTATGACATCGGCAAAAGTAGCAACGCAGCTCATGAATAACAACAACGCACAAAATGGCCGCCAGCAGCCCATATCGCGACTAACAGCGCCCCCAACGGACCCTCGAATGAAGATAACCGCGTCATCATCGGAACAAAAAAAGAAACCGAAAGAACTTTGTC…
TvMasc	58.36	100	23.82	25.66	26.43	26.29	------------------------------MKSVKTTSQPANN--AQNGRQQETSRQQTAPPTDPRKKINASR--HAKKPKEICRDFLWGKCTKGTMCIHLHKMDVKAIKETVKFCHNFQNNVSCT--MCNFLHVSSEEQKLFEKEDIIPRLLIERYKSHNYDLTGVVGADIKPQIGPMYN---FLSKPP-------PPPPPVPAPVPPPVYPVPAPVPPPVYPVPPPIGGPLIGPMLPRPPMPTPLHSMLSLPPPPPP--PPLPKASQPPPPKTPTTTATVTTATTSTSTTTSTKKSAPTKSVSKSPVNTTGMHLLTQPPPAKFDPSKPPPPYKLQLNGA----LKRTAPE-NEAG-RKIAKLEAAKSVESDCNNCVQRELRIELFKQEMKVLEAEQQ…	>LC033426.1 Trilocha varians TvMasc mRNA for zinc finger protein, complete cds	GAAAACTCTGCTGTACTCTGTAGTCTGTACTCTAGTTATGTACTAGTTATTGTTACTTTTCTGACGTAGGTTATAAGTGAAAATGGTTTTTTCGAAATTATCTTAAAATAAGAAATCTTTAATACTTCAGGGGGTTGTGAAAAAGTTATTCGGTGCTGTGATATTCAAAAGATTAGGATACCAAATCCTATCAATGAAATCGGTAAAGACGACGTCACAGCCCGCGAATAATGCACAAAATGGCCGCCAACAAGAGACATCACGACAGCAAACAGCGCCCCCAACGGACCCTAGGAAGAAAATAAACGCGTCACGTCACGCTAAAAAACCAAAAGAAATTTGTCGAGACTTCCTCTGGGGCAAATGCACAAAAGGCACCATGTGTATTCACCTCCATAA…
OfMasc	24.43	23.82	100	32.11	32.42	34.36	----------------------------------------MNAHSEQNGRHVPVQAVP-TTALTDPRTRNSPT-----DKNRVCRDYVWGICNKYGQCKYRHECSLEDMKKIIRFCHNFQNRTGCVRPDCTYLHTSSEEENLFLTTGKLPKVLLDRHTAMNAAAAA-----------ASSVASSYNPTPS-------------------VSFMSPPPPPP-----------------------LPPPQTVPSVMPPPPPPPPPPPPPNEPAAVHPVPTLPTLYAAP----PPQAPPNFQTTQPPP--------------FLPPIFDASRPPPPLPATVKNG---SMKRPNSDASDAGPSKVRKLDDAKPDK-MCEQCIQRELSSELCMQEIEKLNRQQE…	>LC730884.1 Ostrinia furnacalis OfMasc mRNA for masculinizer, complete cds	ATTTTTTTTTTTGCACGCGATTGTTAGAGTTGATGAGATGGTGGTGTTATTTCTTTTGTTTAAATTTTAAACTTGAAGGAATCATGGTTCGATTTAATTATACCATTATGGTGGCGAGACATTAAAGTATTTGTTGGTGTCAATAATTTGCTTAAATGTAGTATGGATATTTTGAGGACCTTGGTGGTGGCGTAAATTGTGAAAGGTACTGTAGGCTCTGGTCAATGGAATTCTATGACCAGTTTAGTATTAATTTCAAATCTGGACCACTCATTATTTTATTGGAATATCCAAATGATAAACTATTTATGTTAAAAGACTTTCTCAAAAAATGAACGCACATAGTGAACAAAATGGCCGCCACGTACCGGTGCAAGCTGTTCCTACTACTGCACTGAC…
SfMasc	29.09	25.66	32.11	100	37.37	43.89	----------------------------------------MTNNNEQNGRQPPLP----PPTQTPNRQSTDQQ-----SQFRNCRDFVWGICTKGAQCRFRHELNVEYMKEILRFCHDYQNKTGCNRPDCTYLHASREEENLFLTAGQIPRALAERYAAMSNGPMN------------MYVNEYLVQPPP-------PP--------------PPPPPPP--------------------PLPSSALPPLPASSLFAPPPPPPPPPPP-TTAIAPVQTTPPLFSAP---PAFNGPTMFTTTQPPP--------------PLPHMFDASRPPPPLPTNATPNKNGAVKRSAERSDEAGPSKAKKADCVKVDG-HCENCIQRELRAELYRQELQKLECEYE…	>LC716474.1 Spodoptera frugiperda cell line Sf9 SfMasc mRNA for masculinizer, complete cds	ATGACTAACAACAACGAACAAAATGGCCGCCAGCCTCCTTTACCGCCACCGACACAGACCCCAAATCGACAATCTACAGACCAACAAAGTCAGTTTAGGAATTGTCGCGACTTTGTTTGGGGCATATGTACTAAAGGGGCTCAGTGTAGATTTCGACATGAATTAAATGTGGAATATATGAAAGAAATCTTAAGGTTTTGTCACGATTATCAGAACAAAACAGGTTGCAATAGACCAGATTGCACGTATTTGCATGCAAGTAGAGAGGAAGAGAACCTCTTTTTAACTGCTGGACAAATACCTAGAGCTCTGGCGGAAAGATATGCAGCTATGTCTAACGGGCCTATGAATATGTACGTGAACGAATATTTAGTACAACCACCACCGCCACCTCCGCCG…
HmMasc	27.6	26.43	32.42	37.37	100	41.97	-----------------MIS-----------------------------RQP-------QSTSSEPGQANSPI-----NGDEICRRYIWGTCTKNTQCIFRHELDIEKMKDILQFCHDYQNRNGCTRENCKYLHATKEEQNLFLATGQVPRVLAERHAAMAAAATNITTNAETIPQIAMFISESYMTQPP---PAPWPPLPPPPAALPPVAT-APPPPPP------------------VSPPRHNALHPIPQNQQPPPPPAPTPAPVP--VSIQQIRPSPTTYPA---MPTQNAPVLFPLTQPPP--------------MVPPTFDASRPPPPIPTHVPPG-NQQLKRKIEANGTAGPSKIRKPDGTEVSDNLCESCVQRELRIDGYKLQMETLHNEEE…	>LC701633.1 Homona magnanima NSR Masc mRNA for Masculinizer variant 1, complete cds	ATGATCTCTCGCCAACCACAATCAACATCATCTGAACCAGGGCAAGCTAATTCCCCAATTAATGGGGACGAAATTTGCCGAAGGTATATTTGGGGTACTTGTACTAAAAATACACAGTGCATCTTTCGTCACGAGTTGGACATTGAGAAGATGAAAGATATTTTACAGTTCTGCCACGATTATCAAAATAGAAACGGGTGTACTAGAGAGAACTGTAAATATCTACACGCTACAAAAGAAGAGCAAAATCTATTTCTTGCTACAGGGCAAGTACCTAGAGTATTAGCAGAACGGCACGCAGCTATGGCTGCAGCTGCTACTAACATAACTACTAACGCTGAGACAATTCCTCAAATAGCCATGTTTATTAGTGAGTCATATATGACTCAACCTCCGCCA…
PmMasc	27.81	26.29	34.36	43.89	41.97	100	MGGFLFLFVVSGGAVRSLISYTLDSKASQINGTLIKAFYSMNNHSDQNGRQPPLPAQPRPPARTETENTTSSN-----EPKQICRNYVWGTCKKNTKCKFRHELDFEEMKKILKFCHDYQNKTGCTRGDCTYLHTTREEENLFLATGEIPRVLAERHAAMQKAAT--ANNGETIRQIAVFIRESYVPPQQNGLPGPMPPSSVPPGATGCAARPAPPPPPPSVHA------------MSVMPAMPLQIMPLPVQQPPPPPPPPPPPPPPPTASPSDPRPTAPVYTAPLGQPPERTTVVFPMNQPPP--------------PLPVMFDASKPPPPLPNQIKAS-SVAVKHKAVSLPEAGPSKIRKPGDNNVADAHCENCVQRKIRIDLYCQELDKLQCEQE…	>lcl|KQ461108.1_cds_KPJ09006.1_46 [locus_tag=RR48_15147] [db_xref=InterPro:IPR000571,UniProtKB/Swiss-Prot:Q96K80] [protein=Zinc finger CCCH domain-containing protein 10] [protein_id=KPJ09006.1] [location=join(649729..649836,651908..652595,653106..653181,653255..653346,653988..654069,654813..654972,655196..655252,655332..655412,655999..656134,656427..656710)] [gbkey=CDS]	ATGGGCGGATTTCTCTTCTTGTTCGTCGTGTCAGGCGGCGCCGTCAGAAGTTTGATATCTTACACCTTAGACAGCAAAGCTTCTCAAATCAACGGAACACTCATCAAAGCGTTTTATTCCATGAACAATCACAGTGATCAAAATGGCCGCCAGCCCCCGCTGCCCGCGCAGCCACGGCCCCCTGCACGGACTGAAACAGAAAATACGACATCAAGCAATGAACCTAAGCAAATATGTCGTAACTATGTCTGGGGCACATGCAAGAAAAATACGAAATGTAAATTTCGTCACGAACTGGATTTTGAAGAAATGAAAAAAATTCTTAAATTCTGTCACGACTATCAAAACAAAACTGGCTGCACGAGGGGAGACTGTACATACCTACATACGACTAGAGAA…
